# Supplementary material for: New small γ-turn type N-primary amino terminal tripeptide organocatalyst for solvent-free asymmetric aldol reaction of various ketones with aldehydes
Source: Royal Society of Chemistry journal article supplement (doi:10.1039/d1ra08635a), 2021-01-01
Supplement: d1ra08635a1.pdf [file d1ra08635a1.pdf]

## Supporting Information

### **New Small $\gamma$ -Turn Type *N*-Primary Amino Terminal Tripeptide Organocatalyst for solvent free Asymmetric Aldol Reaction of Various Ketones with Aldehydes**

Rajkumar Thiyagarajan,<sup>a</sup> Zubeda Begum,<sup>a</sup> Chigusa Seki,<sup>a</sup> Yuko Okuyama,<sup>b</sup> Eunsang Kwon,<sup>c</sup> Koji Uwai,<sup>a</sup> Michio Tokiwa,<sup>d</sup>  
Suguru Tokiwa,<sup>d</sup> Mitsuhiro Takeshita,<sup>d</sup> and Hiroto Nakano<sup>a</sup>

<sup>a</sup> Division of Sustainable and Environmental Engineering, Graduate School of Engineering, Muroran Institute of  
Technology, 27-1 Mizumoto-cho, Muroran 050-8585, Japan.

E-mail: [catanaka@mmm.muroran-it.ac.jp](mailto:catanaka@mmm.muroran-it.ac.jp)

<sup>b</sup> Tohoku Medical and Pharmaceutical University, 4-4-1 Komatsushima, Aoba-ku, Sendai 981 8558, Japan

<sup>c</sup> Research and Analytical Centre for Giant Molecules, Graduate School of Sciences, Tohoku University 6-3 Aoba, Aramaki,  
Aoba-ku, Sendai 980-8578, Japan.

<sup>d</sup> Tokiwakai Group, 62 Numajiri, Tsuduri-chou Uchigo, Iwaki 973-8053, Japan.

# CONTENTS

|                                                                                                                                  | <b>Pages</b> |
|----------------------------------------------------------------------------------------------------------------------------------|--------------|
| <b>1. General information</b>                                                                                                    | <b>1</b>     |
| <b>2. Experimental procedure</b>                                                                                                 | <b>2-12</b>  |
| <b>3. Theoretical Calculations</b>                                                                                               | <b>13-24</b> |
| <b>4. <math>^1\text{H}</math> &amp; <math>^{13}\text{C}</math> NMR spectra of 3a-d, 5a-h, 6a-j, 8, 9, 12a,b, 13a,b and 14a,b</b> | <b>25-55</b> |
| <b>5. HPLC spectra of 17a-s</b>                                                                                                  | <b>56-73</b> |

## 1. General Information

Reagents and dry solvents were of the commercially available maximum grade and used without further purification. Reactions were performed under an inert atmosphere in flame dried and cooled glassware. The reaction progress was monitored by thin layer chromatography (TLC) using Merk silica plate gel 60 F<sub>254</sub> aluminum sheet. The purification of products were carried out using column chromatography techniques in silica gel 60 N (40–50  $\mu\text{m}$ ) purchased from Kanto Chemical Company. Visualization of the products was confirmed by ultraviolet light, iodine vapor and ninhydrin stain. <sup>1</sup>H and <sup>13</sup>C NMR spectra were recorded on a JEOL JNM-ECA500 (<sup>1</sup>H for 500 MHz and <sup>13</sup>C for 125 MHz). All the spectra were recorded at 21 °C. Chemical shifts ( $\delta$ ) are reported in parts per million (ppm) relative to the signals of tetramethylsilane (TMS) using the residual solvents signals. Report data for <sup>1</sup>H NMR spectroscopy was reported as: chemical shift ( $\delta$  ppm), multiplicity (s = singlet, d = doublet, t = triplet, q = quadruplet, dd = doublet of doublets, td = triplet of doublets, m = multiplet and br = broad, coupling constants (J) and assimilation were measured in hertz (Hz). Optical rotation was measured by JASCO DIP-360 polarimeter. The melting point was measured using a Yanaco micro melting point apparatus. High resolution mass spectra (HRMS) data was collected by electron impact (EI) using Hitachi RMG-GMG and JEOL JNK-DX303 sector instruments. The enantiomeric excess (*ee*) was determined using high pressure liquid chromatography (HPLC) principle by DAICEL CHIRALPAK AD-H, AS-H, IC columns.

## 2. Experimental procedure

## 2.1 General procedure for the synthesis of peptide organocatalysts **3a-d**, **5a-h**, **6a-j**, **8**, **9**, **12a,b**, **13a,b** and **14a,b**

To a solution of *N*-Boc-L-Proline, **7** and **11a,b** (0.5mmol), *N,N'*-Dicyclohexylcarbodiimide (DCC) (0.6 mmol) was suspended in dry CH<sub>2</sub>Cl<sub>2</sub> (5 ml) and stirred at 0 °C for 1 hour. The corresponding primary aromatic amines **2a-d** (0.55 mmol) were added slowly and the reaction mixture was gradually allowed to stir from 0 °C to 30 °C until the reaction completion. After the reaction was completed, as monitored by TLC, the insoluble by-product Dicyclohexyl urea (DCU) was filtered off and the filtrate was evaporated to dryness. The obtained oily residue was dissolved in CHCl<sub>3</sub> and washed consecutively with saturated aqueous NaHCO<sub>3</sub> solution, aqueous HCl (1.0 M) and brine. The organic phase was dried over anhydrous Na<sub>2</sub>SO<sub>4</sub>, filtered and concentrated under a reduced pressure to afford the obtained crude products that were used for next step without further purification. To the solution of the crude products in dry CH<sub>2</sub>Cl<sub>2</sub>, TFA was added dropwise over a period of times (v/v) at 0 °C and successively stirred at room temperature (r.t.) for 4 h. After the reaction completion, DCM and TFA were removed under a reduced pressure, the residue was basified by drop-wise addition of saturated NaHCO<sub>3</sub> solution at 0 °C and stirred for 1 hour at r.t. The crude products were extracted with CHCl<sub>3</sub>, dried over Na<sub>2</sub>SO<sub>4</sub> and concentrated under reduced pressure. The residue was purified by flash column chromatography on SiO<sub>2</sub> (CHCl<sub>3</sub>: MeOH = 99:1 to 95: 5) to afford the corresponding amino amides **3a-d**, **8** and **12a,b**.

### 2.1.1 L-Pro-Ph (**3a**)

Colorless solid. 90% yield. mp 73 °C.  $[\alpha]_D^{20} = -71.87$  (c = 0.64, CHCl<sub>3</sub>). <sup>1</sup>H NMR (500 MHz, CDCl<sub>3</sub>, ppm): δ 9.73 (s, 1H), 7.60 (m, 2H), 7.30-7.34 (m, 2H), 7.09 (t, *J* = 7.2 Hz, 1H), 3.86 (dd, *J* = 9.0, 5.3 Hz, 1H), 3.06-3.11 (m, 1H), 2.96-3.00 (m, 1H), 2.18-2.25 (m, 1H), 2.01-2.08 (m, 1H), 1.70-1.82 (m, 2H). <sup>13</sup>C NMR (125 MHz, CDCl<sub>3</sub>, ppm): δ 173.5, 137.8, 128.9, 123.8, 119.2, 61.0, 47.3, 30.77, 26.3. MS (EI): *m/z* = 190 [M]<sup>+</sup>, HRMS calculated for C<sub>11</sub>H<sub>14</sub>N<sub>2</sub>O<sub>1</sub> [M]<sup>+</sup>: 190.2460; found 190.1114.

### 2.1.2. L-Pro-1-Naph (**3b**)

Colorless solid. 95% yield. mp 63 °C.  $[\alpha]_D^{20} = -11.11$  (c = 0.81, CHCl<sub>3</sub>). <sup>1</sup>H NMR (500 MHz, CDCl<sub>3</sub>, ppm): δ 10.59 (s, 1H), 8.24-8.32 (m, 1H), 7.83-7.90 (m, 2H), 7.63-7.68 (m, 1H), 7.47-7.55 (m, 3H), 4.02 (q, *J* = 4.8 Hz, 1H), 3.10-3.21 (m, 2H), 2.25-2.35 (m, 1H), 2.15 (m, 1H), 1.77-1.91 (m, 2H). <sup>13</sup>C NMR (125 MHz, CDCl<sub>3</sub>, ppm): δ 173.5, 134.0, 132.5, 128.8, 126.1, 126.0, 125.7, 124.4, 120.2, 117.7, 61.5, 47.6, 30.9, 26.5. MS (EI): *m/z* = 240 [M]<sup>+</sup>, HRMS calculated for C<sub>15</sub>H<sub>16</sub>N<sub>2</sub>O [M]<sup>+</sup>: 240.3060; found 240.1255.

### 2. 1.3. L-Pro-1-Anth (**3c**)

Yellow solid. 85% yield. mp 91 °C.  $[\alpha]_D^{20} = -134.95$  (c = 0.45, CHCl<sub>3</sub>). <sup>1</sup>H NMR (500 MHz, CDCl<sub>3</sub>, ppm): δ 10.75 (s, 1H), 8.42 (d, *J* = 17.2 Hz, 2H), 8.27 (d, *J* = 6.9 Hz, 1H), 7.97-8.05 (m, 2H), 7.80 (d, *J* = 8.6 Hz, 1H), 7.45-7.54 (m, 3H), 4.08 (q, *J* = 4.8 Hz, 1H), 3.17-3.28 (m, 2H), 2.28-2.36 (m, 1H), 2.20 (m, 1H), 1.88 (m, 2H). <sup>13</sup>C NMR (125 MHz, CDCl<sub>3</sub>, ppm): δ 173.6, 132.2, 132.1, 131.4, 128.4, 128.0, 127.2, 125.7, 125.4, 125.3, 124.6, 118.8, 116.4, 77.3, 77.0, 76.8, 61.6, 47.6, 30.9, 26.5. MS (EI): *m/z* = 290 [M]<sup>+</sup>, HRMS calculated for C<sub>19</sub>H<sub>18</sub>N<sub>2</sub>O [M]<sup>+</sup>: 290.3660, found 290.1414.

### 2.1.4. L-Pro-1-Pyr (**3d**)

Colorless solid. 93% yield. mp 141 °C.  $[\alpha]_D^{20} = -75.55$  (c = 0.45, CHCl<sub>3</sub>). <sup>1</sup>H NMR (500 MHz, CDCl<sub>3</sub>, ppm): δ 10.85 (s, 1H), 8.79 (d, *J* = 8.0 Hz, 1H), 8.17 (q, *J* = 7.4 Hz, 3H), 8.09 (dd, *J* = 17.2, 9.7 Hz, 2H), 8.03-7.98 (m, 3H), 4.15-4.09 (m, 1H), 3.28-3.17 (m, 2H), 2.38-2.31 (m, 1H), 2.22 (m, 1H), 1.97-1.82 (m, 2H). <sup>13</sup>C NMR (125 MHz, CDCl<sub>3</sub>, ppm): δ 173.7, 131.6, 131.0, 130.9, 128.3, 127.8, 127.6,

126.3, 126.2, 125.6, 125.3, 125.3, 124.9, 124.8, 121.8, 119.9, 119.7, 77.4, 77.1, 76.9, 61.7, 47.7, 31.1, 26.6. MS (EI):  $m/z = 314$   $[M]^+$ , HRMS calculated for  $C_{21}H_{18}N_2O$   $[M]^+$ : 314.3880; found 314.1419.

#### 2.1.5. D-Pro-1-Naph (8)

Colorless solid. 90% yield. mp 75 °C.  $[\alpha]_D^{20} = 38.11$  ( $c = 0.45$ ,  $CHCl_3$ ).  $^1H$  NMR (500 MHz,  $CDCl_3$ , ppm):  $\delta$  10.57 (s, 1H), 8.27 (dd,  $J = 7.4, 1.1$  Hz, 1H), 7.88-7.81 (m, 2H), 7.62 (d,  $J = 8.6$  Hz, 1H), 7.54-7.46 (m, 3H), 3.98 (q,  $J = 4.8$  Hz, 1H), 3.17-3.06 (m, 2H), 2.29-2.22 (m, 2H), 2.13 (m, 1H), 1.87-1.74 (m, 2H).  $^{13}C$  NMR (125 MHz,  $CDCl_3$ , ppm):  $\delta$  173.6, 134.1, 132.7, 128.9, 126.2, 126.1, 126.1, 125.9, 124.5, 120.3, 117.8, 61.6, 47.6, 31.0, 29.8, 26.6. MS (EI):  $m/z = 314$   $[M]^+$ , HRMS calculated for  $C_{21}H_{18}N_2O$   $[M]^+$ : 240.3060; found 240.1267.

#### 2.1.6. L-Aze-1-Naph (12a)

Colorless solid. 60% yield. mp 110 °C.  $[\alpha]_D^{20} = -40.62$  ( $c = 0.45$ ,  $CHCl_3$ ).  $^1H$ NMR (500 MHz,  $CDCl_3$ , ppm):  $\delta$  10.41 (s, 1H), 8.28 (d,  $J = 7.4$  Hz, 1H), 7.98 (d,  $J = 8.6$  Hz, 1H), 7.88 (d,  $J = 8.0$  Hz, 1H), 7.67 (d,  $J = 8.0$  Hz, 1H), 7.57-7.48 (m, 3H), 4.60 (dd,  $J = 9.2, 8.0$  Hz, 1H), 3.96-3.88 (m, 1H), 3.50 (m, 1H), 2.84-2.77 (m, 1H), 2.61-2.53 (m, 1H).  $^{13}C$  NMR (125 MHz,  $CDCl_3$ , ppm):  $\delta$  172.2, 134.1, 132.3, 128.8, 126.1, 126.0, 125.9, 124.7, 120.2, 117.9, 60.0, 43.6, 26.7. MS (EI):  $m/z = 226$   $[M]^+$ , HRMS calculated for  $C_{21}H_{18}N_2O$   $[M]^+$ : 226.2790; found 226.1103.

#### 2.1.7. L-Pip-1-Naph (12b)

Colorless solid. 70% yield. mp 99 °C.  $[\alpha]_D^{20} = -28.96$  ( $c = 0.45$ ,  $CHCl_3$ ).  $^1H$  NMR (500 MHz,  $CDCl_3$ , ppm):  $\delta$  9.61 (s, 1H), 8.17 (d,  $J = 6.9$  Hz, 1H), 7.88-7.85 (m, 2H), 7.65 (d,  $J = 8.6$  Hz, 1H), 7.55-7.46 (m, 3H), 3.51 (q,  $J = 4.6$  Hz, 1H), 3.16 (m, 1H), 2.87-2.81 (m, 1H), 2.13-2.08 (m, 1H), 1.87-1.81 (m, 1H), 1.74-1.69 (m, 1H), 1.68-1.61 (m, 1H), 1.57-1.50 (m, 2H).  $^{13}C$  NMR (125 MHz,  $CDCl_3$ , ppm):  $\delta$  172.5, 134.1, 132.5, 128.9, 126.3, 126.2, 126.0, 126.0, 124.9, 120.4, 118.8, 60.7, 45.7, 29.8, 26.1, 23.8. MS (EI):  $m/z = 254$   $[M]^+$ , HRMS calculated for  $C_{21}H_{18}N_2O$   $[M]^+$ : 254.3330; found 254.1423.

### 2.2. General procedure for the synthesis of peptide organocatalysts 5a-h, 9 and 13a,b

*N*-Boc- amino acids **4a-e** (4.135 mmol) were stirred with *N, N'*-Dicyclohexylcarbodiimide DCC (4.55 mmol) in  $CH_2Cl_2$  (15 mL) at 0 °C for 1 h. Corresponding amino amides **3a-d**, **8** **12a,b** (4.135 mmol) were added slowly and the reaction was stirred at 30 °C. After the reaction completion, as monitored by thin layer chromatography, insoluble by-product DCU was filtered off and the filtrate was evaporated to dryness. The obtained oily residue was dissolved in  $CH_2Cl_2$ , and washed sequentially with saturated aqueous  $NaHCO_3$  solution, aqueous HCl (1.0 M), and brine. The organic phase was dried over anhydrous  $Na_2SO_4$ , filtered, and concentrated under a reduced pressure to afford the crude products that were used for next step without further purification. To the solution of the obtained crude products in dry  $CH_2Cl_2$ , TFA was added in dropwise over a period of times (2 mL) at 0 °C and successively stirred at room temperature (r.t.) for 4 h. After the reaction completion DCM and TFA were removed under a reduced pressure, the residue was basified by drop-wise addition of saturated  $NaHCO_3$  solution at 0 °C and stirred for 1 h at r.t. The crude products were extracted with  $CHCl_3$ , dried over  $Na_2SO_4$  and concentrated under reduced pressure. The residue was purified by flash column chromatography on  $SiO_2$  ( $CHCl_3$ : MeOH = 99:1 to 95: 5) to obtain the corresponding dipeptide catalysts **5a-h**, **9** and **13a,b**.

### 2.2.1. L-Ala- L-Pro-1-Naph (5a)

Colorless solid. 88% yield. mp 96 °C.  $[\alpha]_D^{20} = -115.6$  (c = 0.50, CHCl<sub>3</sub>). <sup>1</sup>H NMR (500 MHz, CDCl<sub>3</sub>, ppm): δ 9.93 (s, 1H), 8.15 (d, J = 8.6 Hz, 1H), 8.04 (d, J = 8.6 Hz, 1H), 7.84 (d, J = 8.0 Hz, 1H), 7.64 (d, J = 8.0 Hz, 1H), 7.53-7.56 (m, 1H), 7.44-7.51 (m, 2H), 5.01 (d, J = 6.9 Hz, 1H), 3.77 (q, J = 6.7 Hz, 1H), 3.55-3.63 (m, 2H), 2.70-2.74 (m, 1H), 2.18-2.28 (m, 1H), 2.06-2.14 (m, 1H), 1.83-1.90 (m, 1H), 1.70 (s, 2H), 1.32 (d, J = 6.9 Hz, 3H). <sup>13</sup>C NMR (125 MHz, CDCl<sub>3</sub>) δ 177.4, 169.2, 133.98, 133.2, 128.6, 126.2, 126.1, 125.9, 125.7, 124.8, 120.9, 118.7, 60.7, 48.6, 47.1, 25.9, 25.3, 21.6. MS (EI): m/z = 311 [M]<sup>+</sup>, HRMS calculated for C<sub>18</sub>H<sub>21</sub>N<sub>3</sub>O<sub>2</sub> [M]<sup>+</sup>: 311.3850; found 311.1638.

### 2.2.2. L-Val- L-Pro-1-Naph (5b)

Colorless solid. 91% yield. mp 111 °C.  $[\alpha]_D^{20} = -84.13$  (c = 0.57, CHCl<sub>3</sub>). <sup>1</sup>H NMR (500 MHz, CDCl<sub>3</sub>, ppm): δ 10.02 (s, 1H), 8.19-8.21 (m, 1H), 8.11 (d, J = 8.0 Hz, 1H), 7.84 (d, J = 7.4 Hz, 1H), 7.63 (d, J = 8.0 Hz, 1H), 7.51-7.55 (m, 1H), 7.43-7.51 (m, 2H), 5.03 (d, J = 6.9 Hz, 1H), 3.58-3.64 (m, 2H), 3.40 (d, J = 6.3 Hz, 1H), 2.69-2.73 (m, 1H), 2.20-2.29 (m, 1H), 2.06-2.13 (m, 1H), 1.84-1.98 (m, 2H), 1.57 (s, 2H), 0.91 (q, J = 3.4 Hz, 6H). <sup>13</sup>C NMR (125 MHz, CDCl<sub>3</sub>) δ 176.5, 169.2, 133.9, 133.3, 128.5, 126.1, 125.8, 125.7, 124.7, 121.0, 118.2, 60.6, 58.5, 47.5, 32.6, 25.9, 25.3, 19.9, 17.1. MS (EI): m/z = 339 [M]<sup>+</sup>, HRMS calculated for C<sub>20</sub>H<sub>25</sub>N<sub>3</sub>O<sub>2</sub> [M]<sup>+</sup>: 339.4390; found 339.1942.

### 2.2.3. L-Tle- L-Pro-1-Naph (5c)

Colorless solid. 92% yield. mp 121 °C.  $[\alpha]_D^{20} = -110$  (c = 0.63, CHCl<sub>3</sub>). <sup>1</sup>H NMR (500 MHz, CDCl<sub>3</sub>, ppm): δ 10.02 (s, 1H), 8.22 (d, J = 6.9 Hz, 1H), 8.16 (d, J = 8.6 Hz, 1H), 7.85-7.83 (m, 1H), 7.63 (d, J = 8.0 Hz, 1H), 7.54-7.47 (m, 2H), 7.44 (t, J = 7.7 Hz, 1H), 5.03 (dd, J = 8.0, 1.1 Hz, 1H), 3.69-3.65 (m, 2H), 3.41 (s, 1H), 2.73-2.68 (m, 1H), 2.30-2.20 (m, 1H), 2.12-2.05 (m, 1H), 1.93-1.86 (m, 1H), 1.66 (s, 2H), 0.97 (s, 9H). <sup>13</sup>C NMR (125 MHz, CDCl<sub>3</sub>, ppm): δ 175.6, 169.2, 133.9, 133.3, 128.5, 126.1, 126.0, 125.8, 125.7, 124.6, 121.1, 118.1, 60.5, 60.4, 48.5, 35.5, 26.1, 25.3. MS (EI): m/z = 353 [M]<sup>+</sup>, HRMS calculated for C<sub>21</sub>H<sub>27</sub>N<sub>3</sub>O<sub>2</sub> [M]<sup>+</sup>: 353.4660; found 353.2097.

### 2.2.4. L-Phg- L-Pro-1-Naph (5d)

Colorless solid. 78% yield. mp 101 °C.  $[\alpha]_D^{20} = -29.60$  (c = 0.42, CHCl<sub>3</sub>). <sup>1</sup>H NMR (500 MHz, CDCl<sub>3</sub>, ppm): δ 9.77 (s, 1H), 8.03 (t, J = 8.9 Hz, 2H), 7.85-7.86 (m, 1H), 7.65 (d, J = 8.0 Hz, 1H), 7.49-7.56 (m, 2H), 7.43 (t, J = 8.0 Hz, 1H), 7.32-7.33 (m, 2H), 7.14-7.20 (m, 3H), 5.06 (d, J = 6.9 Hz, 1H), 4.70 (s, 1H), 3.58 (dd, J = 17.2, 9.7 Hz, 1H), 3.27-3.31 (m, 1H), 2.62-2.66 (m, 1H), 2.01-2.12 (m, 5H), 1.83-1.91 (m, 1H). <sup>13</sup>C NMR (125 MHz, CDCl<sub>3</sub>) δ 174.2, 169.0, 140.4, 133.9, 133.0, 129.3, 128.5, 128.2, 126.9, 126.3, 126.2, 125.8, 125.6, 125.0, 121.1, 119.0, 61.0, 58.1, 46.9, 26.2, 25.1. MS (EI): m/z = 373 [M]<sup>+</sup>, HRMS calculated for C<sub>23</sub>H<sub>23</sub>N<sub>3</sub>O<sub>2</sub> [M]<sup>+</sup>: 373.4560; found 373.1794.

### 2.2.5. L-Phe- L-Pro-1-Naph (5e)

Colorless solid. 60% yield. mp 99 °C.  $[\alpha]_D^{20} = -88.00$  (c = 0.40, CHCl<sub>3</sub>). <sup>1</sup>H NMR (500 MHz, CDCl<sub>3</sub>, ppm): δ 9.99 (s, 1H), 8.24 (d, J = 8.6 Hz, 1H), 8.16 (d, J = 8.6 Hz, 1H), 7.87 (d, J = 8.6 Hz, 1H), 7.67 (d, J = 8.6 Hz, 1H), 7.58-7.62 (m, 1H), 7.44-7.53 (m, 2H), 7.02-7.05 (m, 3H), 6.96-6.98 (m, 2H), 4.99 (d, J = 6.9 Hz, 1H), 3.85 (t, J = 7.2 Hz, 1H), 3.48 (m, 1H), 3.02-3.08 (m, 1H), 2.96 (q, J = 6.9 Hz, 1H), 2.85 (q, J = 6.5 Hz, 1H), 2.64 (q, J = 5.9 Hz, 1H), 1.95-2.07 (m, 2H), 1.76-1.84 (m, 1H), 1.66 (s, 2H). <sup>13</sup>C NMR (125 MHz, CDCl<sub>3</sub>) δ 175.7, 168.6, 136.7, 134.0, 133.3, 129.1, 128.6, 128.5, 126.8, 126.3, 125.9, 125.9, 125.7, 124.7, 120.9, 118.2, 60.6, 55.0, 47.1, 43.1, 25.9, 25.1. MS (EI): m/z = 387 [M]<sup>+</sup>, HRMS calculated for C<sub>24</sub>H<sub>25</sub>N<sub>3</sub>O<sub>2</sub> [M]<sup>+</sup>: 387.4830; found 387.1950.

### 2.2.6. L-Tle- L-Pro-1-Ph (5f)

Colorless solid. 80% yield. mp 153 °C.  $[\alpha]_D^{20} = -42.50$  (c = 0.40, CHCl<sub>3</sub>). <sup>1</sup>H NMR (500 MHz, CDCl<sub>3</sub>, ppm): δ 9.56 (s, 1H), 7.48 (d, J = 8.0 Hz, 2H), 7.29 (m, 2H), 7.05 (t, J = 7.2 Hz, 1H), 4.86 (dd, J = 8.0, 1.7 Hz, 1H), 3.60-3.63 (m, 2H), 3.37 (s, 1H), 2.55-2.59 (m, 1H), 2.11-2.21 (m, 1H), 1.98-2.05 (m, 1H), 1.80-1.88 (m, 1H), 1.71 (s, 2H), 0.98 (s, 9H). <sup>13</sup>C NMR (125 MHz, CDCl<sub>3</sub>, ppm): δ 175.4, 168.9, 138.3, 129.0, 124.0, 119.7, 60.5, 60.5, 48.5, 35.6, 26.2, 26.0, 25.3. MS (EI): m/z = 303 [M]<sup>+</sup>, HRMS calculated for C<sub>17</sub>H<sub>25</sub>N<sub>3</sub>O<sub>2</sub> [M]<sup>+</sup>: 303.4060; found 303.1949.

### 2.2.7. L-Tle- L-Pro-1-Anth (5g)

Yellow solid. 91% yield. mp 91 °C.  $[\alpha]_D^{20} = -134.95$  (c = 0.45, CHCl<sub>3</sub>). <sup>1</sup>H NMR (500 MHz, CDCl<sub>3</sub>, ppm): δ 10.23 (s, 1H), 8.77 (s, 1H), 8.42 (s, 1H), 8.29 (d, J = 7.4 Hz, 1H), 8.11 (dd, J = 5.4, 3.7 Hz, 1H), 7.99 (dd, J = 5.7, 4.0 Hz, 1H), 7.78 (d, J = 8.6 Hz, 1H), 7.41-7.50 (m, 3H), 5.09 (d, J = 6.9 Hz, 1H), 3.66-3.71 (m, 2H), 3.42 (s, 1H), 2.74 (m, 1H), 2.23-2.33 (m, 1H), 2.09-2.13 (m, 1H), 1.89-1.97 (m, 1H), 1.69 (s, 2H), 0.96 (s, 9H). <sup>13</sup>C NMR (125 MHz, CDCl<sub>3</sub>, ppm): δ 175.8, 169.3, 133.3, 132.1, 131.6, 131.4, 128.7, 127.7, 126.9, 125.7, 125.4, 125.2, 124.7, 124.7, 119.7, 116.3, 60.6, 60.4, 48.5, 35.5, 26.2, 26.1, 25.4. MS (EI): m/z = 403 [M]<sup>+</sup>, HRMS calculated for C<sub>25</sub>H<sub>29</sub>N<sub>3</sub>O<sub>2</sub> [M]<sup>+</sup>: 403.5260; found 403.2269.

### 2.2.8. L-Tle- L-Pro-1-Pyr (5h)

Green solid. 91% yield. mp 95 °C.  $[\alpha]_D^{20} = -151.78$  (c = 0.56, CHCl<sub>3</sub>). <sup>1</sup>H NMR (500 MHz, CDCl<sub>3</sub>, ppm): δ 10.35 (s, 1H), 8.75 (d, J = 8.6 Hz, 1H), 8.37 (d, J = 9.2 Hz, 1H), 8.14-8.18 (m, 3H), 8.11 (t, J = 4.6 Hz, 1H), 7.95-8.02 (m, 3H), 5.12-5.14 (m, 1H), 3.67-3.74 (m, 2H), 3.44 (s, 1H), 2.74-2.79 (m, 1H), 2.26-2.35 (m, 1H), 2.13 (m, 1H), 1.91-1.99 (m, 1H), 1.63 (s, 2H), 1.00 (s, 9H). <sup>13</sup>C NMR (125 MHz, CDCl<sub>3</sub>, ppm): δ 175.9, 169.2, 131.6, 131.4, 130.9, 128.2, 127.7, 127.3, 126.3, 126.0, 125.2, 125.1, 124.8, 124.7, 121.6, 120.6, 119.7, 60.6, 60.5, 48.5, 35.6, 26.2, 26.1, 25.4. MS (EI): m/z = 427 [M]<sup>+</sup>, HRMS calculated for C<sub>27</sub>H<sub>29</sub>N<sub>3</sub>O<sub>2</sub> [M]<sup>+</sup>: 427.5480; found 427.2254.

### 2.2.9. L-Tle-D-Pro-1-Naph (9)

Colorless solid. 85% yield. mp 153 °C.  $[\alpha]_D^{20} = 10.96$  (c = 0.40, CHCl<sub>3</sub>). <sup>1</sup>H NMR (500 MHz, CDCl<sub>3</sub>, ppm): δ 10.07 (s, 1H), 8.16-8.10 (m, 2H), 7.83 (d, J = 8.0 Hz, 1H), 7.63 (d, J = 8.0 Hz, 1H), 7.54-7.43 (m, 3H), 5.01 (d, J = 8.0 Hz, 1H), 3.73-3.59 (m, 2H), 3.40 (d, J = 11.5 Hz, 1H), 2.71 (q, J = 6.1 Hz, 1H), 2.26-2.16 (m, 1H), 2.08 (s, 1H), 1.90-1.82 (m, 1H), 1.63 (s, 2H), 1.08 (s, 9H). <sup>13</sup>C NMR (125 MHz, CDCl<sub>3</sub>, ppm): δ 175.6, 169.2, 133.9, 133.3, 128.5, 126.1, 126.0, 125.8, 125.7, 124.6, 121.1, 118.1, 60.5, 60.4, 48.5, 35.5, 26.1, 25.3. MS (EI): m/z = 353 [M]<sup>+</sup>, HRMS calculated for C<sub>27</sub>H<sub>29</sub>N<sub>3</sub>O<sub>2</sub> [M]<sup>+</sup>: 353.4660; found 353.2097.

### 2.2.10. L-Tle- L-Aze-1-Naph (13a)

Colorless solid. 70% yield. mp 153 °C.  $[\alpha]_D^{20} = -121.06$  (c = 0.40, CHCl<sub>3</sub>). <sup>1</sup>H NMR (500 MHz, CDCl<sub>3</sub>, ppm): δ 10.32 (s, 1H), 8.28 (d, J = 7.4 Hz, 1H), 8.15 (d, J = 8.6 Hz, 1H), 7.86-7.84 (m, 1H), 7.65 (d, J = 8.0 Hz, 1H), 7.53-7.46 (m, 3H), 5.21 (dd, J = 9.2, 6.3 Hz, 1H), 4.29 (m, 1H), 4.17 (m, 1H), 3.12 (s, 1H), 2.97-2.91 (m, 1H), 2.58-2.51 (m, 1H), 1.60 (s, 2H), 1.00 (s, 9H). <sup>13</sup>C NMR (125 MHz, CDCl<sub>3</sub>, ppm): δ 177.0, 169.1, 134.0, 133.2, 128.5, 126.2, 125.9, 125.7, 124.8, 121.1, 118.3, 62.9, 58.5, 49.5, 35.2, 26.1, 18.0. MS (EI): m/z = 339 [M]<sup>+</sup>, HRMS calculated for C<sub>27</sub>H<sub>29</sub>N<sub>3</sub>O<sub>2</sub> [M]<sup>+</sup>: 339.4390; found 339.1951.

### 2.2.11. L-Tle- L-Pip-1-Naph (13b)

Colorless solid. 70% yield. mp 153 °C.  $[\alpha]_D^{20} = -109.72$  (c = 0.40, CHCl<sub>3</sub>). <sup>1</sup>H NMR (500 MHz, CDCl<sub>3</sub>, ppm): δ 9.10 (s, 1H), 8.21 (d, *J* = 7.4 Hz, 1H), 7.98-7.95 (m, 1H), 7.85 (dd, *J* = 7.2, 2.6 Hz, 1H), 7.64 (d, *J* = 8.0 Hz, 1H), 7.53-7.48 (m, 3H), 7.47-7.44 (m, 1H), 5.50 (d, *J* = 5.2 Hz, 1H), 4.06 (d, *J* = 13.7 Hz, 1H), 3.66 (s, 1H), 3.21 (m, 1H), 2.36 (d, *J* = 13.7 Hz, 1H), 2.18-2.08 (m, 1H), 1.83-1.76 (m, 3H), 1.67 (s, 3H), 1.59 (m, 1H), 0.95 (s, 9H). <sup>13</sup>C NMR (125 MHz, CDCl<sub>3</sub>, ppm): δ 177.0, 169.7, 134.1, 132.9, 128.8, 126.3, 126.0, 125.9, 125.6, 124.8, 120.6, 118.2, 57.8, 52.9, 45.1, 36.0, 26.5, 25.7, 25.1, 20.3. MS (EI): *m/z* = 367 [M]<sup>+</sup>, HRMS calculated for C<sub>27</sub>H<sub>29</sub>N<sub>3</sub>O<sub>2</sub> [M]<sup>+</sup>: 367.4930; found 367.2268.

## 2.3. General procedure for the synthesis of peptide organocatalysts 6a-j, 10 and 14a-b

To a solution of *N*, *N'*-Dicyclohexylcarbodiimide (DCC) (1.29 mmol) in dry CH<sub>2</sub>Cl<sub>2</sub> (10 mL) were added *N*-Boc-L-amino acids **4'a-f** (0.86 mmol) at 0 °C and the reaction mixture was stirred for 1 hour. After 1 hour, corresponding dipeptides **5a-h**, **9** and **13a-b** (0.95 mmol) were added and the reaction was stirred for another 24 hour at rt. The insoluble by-product DCU was filtered off and the filtrate evaporated to dryness. The obtained oily residue was dissolved in CH<sub>2</sub>Cl<sub>2</sub> and extracted sequentially with saturated aqueous NaHCO<sub>3</sub> solution, aqueous HCl (1.0 M), and brine. The organic phase was dried over anhydrous Na<sub>2</sub>SO<sub>4</sub>, filtered, and concentrated under a reduced pressure to afford the crude products that were used for next step without further purification. To the solution of the crude products in dry CH<sub>2</sub>Cl<sub>2</sub>, TFA was added in dropwise over a period of times (0.4 mL) at 0 °C and successively stirred at room temperature (r.t.) for 4 h. After the reaction completion, DCM and TFA were removed under a reduced pressure, the residue was basified by drop-wise addition of saturated NaHCO<sub>3</sub> solution at 0 °C and stirred for 1 h at r.t. The crude products were extracted with CHCl<sub>3</sub>, dried over Na<sub>2</sub>SO<sub>4</sub> and concentrated under reduced pressure. The residue was purified by flash column chromatography on SiO<sub>2</sub> (CHCl<sub>3</sub>: MeOH = 99:1 to 95: 5) to obtain the corresponding tripeptide catalysts **6a-j**, **10** and **14a,b**.

### 2.3.1. L-Ala- L-Tle- L-Pro-1-Naph (6a)

White solid. 93% yield. mp 102 °C.  $[\alpha]_D^{20} = -46.59$  (c = 0.58, CHCl<sub>3</sub>). <sup>1</sup>H NMR (500 MHz, CDCl<sub>3</sub>, ppm): δ 9.83 (s, 1H), 8.20 (d, *J* = 6.9 Hz, 1H), 8.15 (q, *J* = 4.6 Hz, 2H), 7.84-7.86 (m, 1H), 7.64 (d, *J* = 8.0 Hz, 1H), 7.44-7.54 (m, 3H), 4.98 (dd, *J* = 7.4, 1.7 Hz, 1H), 4.65 (d, *J* = 9.2 Hz, 1H), 3.97 (m, 1H), 3.71-3.76 (m, 1H), 3.56 (q, *J* = 6.9 Hz, 1H), 2.65-2.69 (m, 1H), 2.20-2.30 (m, 1H), 2.05-2.13 (m, 1H), 1.87-1.95 (m, 1H), 1.57 (s, 3H), 1.39 (d, *J* = 6.9 Hz, 3H), 1.01 (s, 9H). <sup>13</sup>C NMR (125 MHz, CDCl<sub>3</sub>, ppm): δ 175.7, 172.8, 169.1, 133.9, 133.2, 128.5, 126.1, 125.8, 125.8, 125.7, 124.7, 121.0, 118.2, 60.6, 56.5, 50.8, 48.8, 35.2, 26.3, 26.1, 25.3, 21.9. MS (EI): *m/z* = 424 [M]<sup>+</sup>, HRMS calculated for C<sub>24</sub>H<sub>32</sub>N<sub>4</sub>O<sub>3</sub> [M]<sup>+</sup>: 424.5450; found 424.2467.

### 2.3.2. L-Val- L-Tle- L-Pro-1-Naph (6b)

White solid. 90% yield. mp 83 °C.  $[\alpha]_D^{20} = -62.50$  (c = 0.58, CHCl<sub>3</sub>). <sup>1</sup>H NMR (500 MHz, CDCl<sub>3</sub>, ppm): δ 9.85 (s, 1H), 8.24 (d, *J* = 9.2 Hz, 1H), 8.20 (d, *J* = 8.0 Hz, 1H), 8.15 (d, *J* = 8.0 Hz, 1H), 7.83-7.87 (m, 1H), 7.64 (t, *J* = 8.3 Hz, 1H), 7.47-7.54 (m, 2H), 7.45 (t, *J* = 7.7 Hz, 1H), 4.98 (dd, *J* = 7.7, 1.4 Hz, 1H), 4.67 (d, *J* = 9.2 Hz, 1H), 4.00 (m, 1H), 3.71-3.75 (m, 1H), 3.31 (d, *J* = 4.0 Hz, 1H), 2.66 (m, 1H), 2.33-2.42 (m, 1H), 2.20-2.29 (m, 1H), 2.07-2.12 (m, 1H), 1.86-1.94 (m, 1H), 1.03 (d, *J* = 6.9 Hz, 4H), 1.01 (s, 9H), 0.87 (d, *J* = 6.9 Hz, 3H). <sup>13</sup>C NMR (125 MHz, CDCl<sub>3</sub>) δ 174.4, 172.9, 169.1, 133.9, 133.2, 128.5, 126.1, 125.8, 125.8, 125.7, 124.7, 121.1, 118.2, 60.6, 60.2, 56.6, 48.8, 34.9, 30.6, 26.4, 26.1, 25.3, 19.7, 16.1. MS (EI): *m/z* = 452 [M]<sup>+</sup>, HRMS calculated for C<sub>26</sub>H<sub>36</sub>N<sub>4</sub>O<sub>3</sub> [M]<sup>+</sup>: 452.5990; found 452.2781.



### 2.3.3. L-Tle- L-Tle- L-Pro-1-Naph (6c)

White solid. 96% yield. mp 177 °C.  $[\alpha]_D^{20} = -70.31$  (c = 0.40, CHCl<sub>3</sub>). <sup>1</sup>H NMR (500 MHz, CDCl<sub>3</sub>, ppm): δ 1.02 (s, 9H), 1.05 (s, 9H), 1.57 (s, 2H), 1.84-1.98 (m, 1H), 2.04-2.15 (m, 1H), 2.17-2.32 (m, 1H), 2.66 (m, 1H), 3.20 (s, 1H), 3.68-3.77 (m, 1H), 3.99 (m, 1H), 4.67 (d, *J* = 9.2 Hz, 1H), 4.97 (d, *J* = 8.0 Hz, 1H), 7.41-7.56 (m, 3H), 7.63 (d, *J* = 8.6 Hz, 1H), 7.78-7.90 (m, 2H), 8.14 (d, *J* = 8.0 Hz, 1H), 8.20 (d, *J* = 7.4 Hz, 1H), 9.83 (s, 1H). <sup>13</sup>C NMR (125 MHz, CDCl<sub>3</sub>, ppm): δ 173.8, 173.0, 169.1, 133.9, 133.2, 128.5, 126.1, 125.8, 125.7, 124.7, 121.1, 118.2, 64.4, 60.5, 56.6, 48.8, 34.9, 34.2, 26.9, 26.5, 26.1, 25.3. MS (EI): *m/z* = 466 [M]<sup>+</sup>, HRMS calculated for C<sub>27</sub>H<sub>38</sub>N<sub>4</sub>O<sub>3</sub> [M]<sup>+</sup>: 466.6260; found 466.2949.

### 2.3.4. L-Phg- L-Tle- L-Pro-1-Naph (6d)

White solid. 72% yield. mp 106 °C.  $[\alpha]_D^{20} = +46.59$  (c = 0.58, CHCl<sub>3</sub>). <sup>1</sup>H NMR (500 MHz, CDCl<sub>3</sub>, ppm): δ 9.75 (s, 1H), 8.14 (dd, *J* = 23.8, 7.7 Hz, 2H), 7.83-7.85 (m, 1H), 7.64 (d, *J* = 8.6 Hz, 1H), 7.49-7.54 (m, 3H), 7.43-7.47 (m, 1H), 7.36-7.42 (m, 4H), 7.30-7.34 (m, 1H), 4.93 (dd, *J* = 7.7, 2.0 Hz, 1H), 4.68 (d, *J* = 9.7 Hz, 1H), 4.57 (s, 1H), 3.86 (m, 1H), 3.66-3.70 (m, 1H), 2.60-2.66 (m, 1H), 2.15-2.25 (m, 1H), 1.99-2.06 (m, 1H), 1.83-1.87 (m, 2H), 0.94 (s, 9H). <sup>13</sup>C NMR (125 MHz, CDCl<sub>3</sub>, ppm): δ 172.8, 172.4, 169.1, 141.1, 134.0, 133.1, 129.0, 128.5, 128.2, 126.9, 126.1, 125.9, 125.8, 125.7, 124.8, 121.0, 118.4, 60.6, 59.9, 56.8, 48.7, 35.4, 26.3, 26.2, 25.2. MS (EI): *m/z* = 486 [M]<sup>+</sup>, HRMS calculated for C<sub>29</sub>H<sub>34</sub>N<sub>4</sub>O<sub>3</sub> [M]<sup>+</sup>: 486.6160; found 486.2638.

### 2.3.5. L-Phe- L-Tle- L-Pro-1-Naph (6e)

White solid. 85% yield. mp 93 °C.  $[\alpha]_D^{20} = +84.63$  (c = 0.58, CHCl<sub>3</sub>). <sup>1</sup>H NMR (500 MHz, CDCl<sub>3</sub>, ppm): δ 9.79 (s, 1H), 8.12-8.19 (m, 3H), 7.82 (dd, *J* = 9.5, 8.3 Hz, 1H), 7.63 (d, *J* = 8.6 Hz, 1H), 7.42-7.53 (m, 3H), 7.32 (t, *J* = 7.4 Hz, 2H), 7.24 (dd, *J* = 16.3, 7.2 Hz, 3H), 4.96 (dd, *J* = 8.0, 1.7 Hz, 1H), 4.61-4.67 (m, 1H), 3.99 (m, 1H), 3.71-3.76 (m, 1H), 3.67 (q, *J* = 4.4 Hz, 1H), 3.28 (dd, *J* = 13.7, 3.4 Hz, 1H), 2.75 (dd, *J* = 13.7, 9.2 Hz, 1H), 2.63-2.67 (m, 1H), 2.20-2.33 (m, 1H), 2.07-2.16 (m, 1H), 1.88-1.95 (m, 1H), 1.56 (d, *J* = 8.0 Hz, 2H), 0.93-1.02 (m, 9H). <sup>13</sup>C NMR (125 MHz, CDCl<sub>3</sub>, ppm): δ 174.3, 172.6, 169.1, 137.6, 133.9, 133.2, 129.3, 128.7, 128.5, 126.9, 126.1, 125.8, 125.7, 124.7, 121.1, 118.3, 60.6, 56.7, 56.5, 48.8, 40.9, 35.2, 26.3, 26.2, 25.3. MS (EI): *m/z* = 500 [M]<sup>+</sup>, HRMS calculated for C<sub>30</sub>H<sub>36</sub>N<sub>4</sub>O<sub>3</sub> [M]<sup>+</sup>: 500.6430; found 500.2792.

### 2.3.6. Gly- L-Tle- L-Pro-1-Naph (6f)

White solid. 87% yield. mp 99 °C.  $[\alpha]_D^{20} = -55.00$  (c = 0.4, CHCl<sub>3</sub>). <sup>1</sup>H NMR (500 MHz, CDCl<sub>3</sub>, ppm): δ 9.81 (s, 1H), 8.17 (dd, *J* = 26.6, 7.7 Hz, 2H), 8.01 (d, *J* = 9.2 Hz, 1H), 7.84-7.85 (m, 1H), 7.64 (d, *J* = 8.0 Hz, 1H), 7.43-7.54 (m, 3H), 4.97 (dd, *J* = 8.0, 1.7 Hz, 1H), 4.72 (d, *J* = 9.2 Hz, 1H), 3.95 (m, 1H), 3.72-3.76 (m, 1H), 3.43 (dd, *J* = 21.8, 17.2 Hz, 2H), 2.66 (m, 1H), 2.20-2.30 (m, 1H), 2.04-2.12 (m, 1H), 1.88-1.95 (m, 1H), 1.60 (s, 2H), 1.01 (s, 9H). <sup>13</sup>C NMR (125 MHz, CDCl<sub>3</sub>, ppm): δ 172.6, 169.1, 133.9, 133.2, 128.5, 126.1, 125.8, 125.7, 124.7, 121.0, 118.3, 60.6, 56.5, 48.8, 44.6, 35.3, 26.3, 26.2, 25.3. MS (EI): *m/z* = 410 [M]<sup>+</sup>, HRMS calculated for C<sub>23</sub>H<sub>30</sub>N<sub>4</sub>O<sub>3</sub> [M]<sup>+</sup>: 410.5180; found 410.2319.

### 2.3.7. L-Tle- L-Tle- L-Pro-Ph (6g)

White solid. 70% yield. mp 233 °C.  $[\alpha]_D^{20} = -71.42$  (c = 0.55, CHCl<sub>3</sub>). <sup>1</sup>H NMR (500 MHz, CDCl<sub>3</sub>, ppm): δ 9.38 (s, 1H), 7.55 (d, *J* = 8.0 Hz, 2H), 7.31 (t, *J* = 8.0 Hz, 2H), 7.09 (t, *J* = 7.4 Hz, 1H), 4.62-4.70 (m, 2H), 3.88 (q, *J* = 8.4 Hz, 1H), 3.71 (m, 1H), 3.37 (s, 1H), 2.40 (q, *J* = 3.6 Hz, 1H), 2.12-2.21 (m, 1H), 1.92-2.05 (m, 2H), 1.04 (s, 9H), 0.99 (s, 9H). <sup>13</sup>C NMR (125 MHz, CDCl<sub>3</sub>, ppm): δ 171.8, 168.9, 138.2, 129.0, 124.1, 119.5, 64.1, 60.7, 57.3, 48.8, 35.1, 33.6, 27.1, 26.6, 26.5, 25.1. MS (EI): *m/z* = 416 [M]<sup>+</sup>, HRMS calculated for C<sub>23</sub>H<sub>36</sub>N<sub>4</sub>O<sub>3</sub> [M]<sup>+</sup>: 416.5660; found 416.2853.

### 2.3.8. L-Tle- L-Tle- L-Pro-1-Anth (6h)

Brown solid. 80% yield. mp 105 °C.  $[\alpha]_D^{20} = -23.45$  (c = 0.60, CHCl<sub>3</sub>). <sup>1</sup>H NMR (500 MHz, CDCl<sub>3</sub>, ppm): δ 10.04 (s, 1H), 8.74 (s, 1H), 8.43 (s, 1H), 8.27 (d, J = 7.4 Hz, 1H), 8.09-8.11 (m, 1H), 8.00 (dd, J = 5.9, 3.9 Hz, 1H), 7.90 (d, J = 9.2 Hz, 1H), 7.79 (d, J = 8.6 Hz, 1H), 7.48 (m, 2H), 7.43 (dd, J = 8.6, 7.4 Hz, 1H), 5.05 (dd, J = 7.7, 1.4 Hz, 1H), 4.69 (d, J = 9.7 Hz, 1H), 4.02 (m, 1H), 3.74-3.78 (m, 1H), 3.24 (s, 1H), 2.69-2.72 (m, 1H), 2.23-2.33 (m, 1H), 2.12 (m, 1H), 1.91-1.99 (m, 1H), 1.60 (s, 2H), 1.08 (s, 9H), 1.00 (s, 9H). <sup>13</sup>C NMR (125 MHz, CDCl<sub>3</sub>, ppm): δ 173.9, 173.0, 169.2, 133.1, 132.1, 131.5, 131.4, 128.6, 127.8, 127.0, 125.7, 125.5, 125.2, 124.8, 124.7, 119.6, 116.6, 77.2, 77.0, 76.7, 64.5, 60.6, 56.7, 48.8, 34.8, 34.2, 26.9, 26.5, 26.1, 25.3. MS (EI): m/z = 516 [M]<sup>+</sup>, HRMS calculated for C<sub>31</sub>H<sub>40</sub>N<sub>4</sub>O<sub>3</sub> [M]<sup>+</sup>: 516.6860; found 516.3094.

### 2.3.9. L-Tle- L-Tle- L-Pro-1-Pyr (6i)

Green solid. 83% yield. mp 115 °C.  $[\alpha]_D^{20} = -8.0$  (c = 0.50, CHCl<sub>3</sub>). <sup>1</sup>H NMR (500 MHz, CDCl<sub>3</sub>, ppm): δ 10.16 (s, 1H), 8.72 (d, J = 8.6 Hz, 1H), 8.34 (d, J = 9.2 Hz, 1H), 8.14-8.16 (m, 3H), 8.10 (d, J = 9.2 Hz, 1H), 7.97-8.02 (m, 3H), 7.90 (d, J = 9.2 Hz, 1H), 5.07 (d, J = 8.0 Hz, 1H), 4.70 (d, J = 9.2 Hz, 1H), 4.02 (m, 1H), 3.74-3.79 (m, 1H), 3.22 (s, 1H), 2.72 (m, 1H), 2.24-2.34 (m, 1H), 2.09-2.17 (m, 1H), 1.92-2.00 (m, 1H), 1.58 (s, 4H), 1.06 (s, 9H), 1.04 (s, 9H). <sup>13</sup>C NMR (125 MHz, CDCl<sub>3</sub>, ppm): δ 174.0, 173.2, 169.3, 131.6, 131.5, 131.0, 128.4, 127.7, 127.4, 126.5, 126.1, 125.3, 125.2, 125.2, 124.9, 124.8, 121.8, 120.7, 120.0, 64.5, 60.7, 56.8, 48.9, 35.0, 34.3, 27.0, 26.6, 26.3, 25.5. MS (EI): m/z = 540 [M]<sup>+</sup>, HRMS calculated for C<sub>33</sub>H<sub>40</sub>N<sub>4</sub>O<sub>3</sub> [M]<sup>+</sup>: 540.7080; found 540.3094.

### 2.3.10. D-Tle- L-Tle- L-Pro-1-Naph (6j)

White solid. 70% yield. mp 233 °C.  $[\alpha]_D^{20} = 56.13$  (c = 0.45, CHCl<sub>3</sub>). <sup>1</sup>H NMR (500 MHz, CDCl<sub>3</sub>, ppm): δ 9.82 (s, 1H), 8.20 (d, J = 7.4 Hz, 1H), 8.13 (d, J = 8.0 Hz, 1H), 7.85-7.84 (m, 1H), 7.64 (d, J = 8.6 Hz, 1H), 7.51 (m, 2H), 7.47-7.43 (m, 1H), 7.11 (d, J = 9.2 Hz, 1H), 4.96 (dd, J = 8.0, 1.7 Hz, 1H), 4.70 (d, J = 9.2 Hz, 1H), 3.96 (m, 1H), 3.74-3.70 (m, 1H), 3.12 (s, 1H), 2.69-2.66 (m, 1H), 2.29-2.20 (m, 1H), 2.10 (m, 1H), 1.94-1.87 (m, 1H), 1.55 (s, 2H), 1.03 (s, 9H), 1.01 (s, 9H). <sup>13</sup>C NMR (125 MHz, CDCl<sub>3</sub>, ppm): δ 173.8, 172.9, 169.2, 134.1, 133.3, 128.7, 126.2, 126.0, 125.9, 124.8, 121.2, 118.3, 64.8, 60.7, 56.8, 48.8, 35.2, 34.5, 26.8, 26.6, 26.3, 25.4. MS (EI): m/z = 466 [M]<sup>+</sup>, HRMS calculated for C<sub>33</sub>H<sub>40</sub>N<sub>4</sub>O<sub>3</sub> [M]<sup>+</sup>: 466.6260; found 466.3142.

### 2.3.11. L-Tle- L-Tle-D-Pro-1-Naph (10)

White solid. 85% yield. mp 225 °C.  $[\alpha]_D^{20} = 73.22$  (c = 0.51, CHCl<sub>3</sub>). <sup>1</sup>H NMR (500 MHz, CDCl<sub>3</sub>, ppm): δ 9.66 (s, 1H), 8.05 (d, J = 8.6 Hz, 1H), 7.98 (d, J = 7.4 Hz, 1H), 7.82 (d, J = 8.6 Hz, 1H), 7.65 (d, J = 8.6 Hz, 1H), 7.53-7.42 (m, 3H), 4.93 (d, J = 8.0 Hz, 1H), 4.58 (d, J = 8.0 Hz, 1H), 4.15-4.11 (m, 1H), 3.74-3.65 (m, 1H), 2.77 (s, 1H), 2.64 (q, J = 6.3 Hz, 1H), 2.29-2.19 (m, 1H), 2.13-2.08 (m, 1H), 2.01-1.93 (m, 1H), 1.12 (s, 9H), 0.80 (s, 9H). <sup>13</sup>C NMR (125 MHz, CDCl<sub>3</sub>, ppm): δ 174.4, 172.3, 169.7, 134.2, 133.3, 128.5, 127.2, 126.0, 125.8, 125.4, 122.0, 120.4, 64.3, 61.1, 57.6, 48.4, 34.6, 34.0, 28.1, 26.8, 26.7, 24.8. MS (EI): m/z = 466 [M]<sup>+</sup>, HRMS calculated for C<sub>33</sub>H<sub>40</sub>N<sub>4</sub>O<sub>3</sub> [M]<sup>+</sup>: 466.6260; found 466.4930.

### 2.3.12. L-Tle- L-Tle- L-Aze-1-Naph (14a)

White solid. 90% yield. mp 168 °C.  $[\alpha]_D^{20} = -89.70$  (c = 0.55, CHCl<sub>3</sub>). <sup>1</sup>H NMR (500 MHz, CDCl<sub>3</sub>, ppm): δ 10.15 (s, 1H), 8.25 (d, J = 6.9 Hz, 1H), 8.13-8.11 (m, 1H), 7.86-7.83 (m, 2H), 7.65 (d, J = 8.0 Hz, 1H), 7.52-7.46 (m, 3H), 5.19 (dd, J = 9.7, 6.3 Hz, 1H), 4.60 (dd, J = 15.8, 8.9 Hz, 1H), 4.30 (d, J = 9.2 Hz, 1H), 4.21 (td, J = 8.6, 5.7 Hz, 1H), 3.21 (d, J = 16.0 Hz, 1H), 2.97-2.90 (m, 1H), 2.59-2.51 (m, 1H), 1.58 (s, 2H), 1.06 (s, 10H), 1.05 (s, 9H). <sup>13</sup>C NMR (125 MHz, CDCl<sub>3</sub>, ppm): δ 174.7, 174.1, 169.2, 134.1, 133.2, 128.7, 126.2,

126.0, 126.0, 125.9, 125.0, 121.2, 118.6, 64.5, 63.0, 55.0, 50.0, 34.4, 34.3, 27.0, 26.6, 18.1. MS (EI):  $m/z = 466 [M]^+$ , HRMS calculated for  $C_{33}H_{40}N_4O_3 [M]^+$ : 452.5990; found 452.2785.

### 2.3.13. L-Tle- L-Tle- L-Pip-1-Naph (14b)

White solid. 75% yield. mp 220 °C.  $[\alpha]_D^{20} = -93.81$  ( $c = 0.50$ ,  $CHCl_3$ ).  $^1H$  NMR (500 MHz,  $CDCl_3$ , ppm):  $\delta$  8.83 (s, 1H), 8.15 (d,  $J = 8.0$  Hz, 1H), 7.93-7.88 (m, 1H), 7.85-7.78 (m, 2H), 7.73-7.67 (m, 2H), 7.52-7.48 (m, 2H), 5.46 (d,  $J = 4.0$  Hz, 1H), 5.04 (d,  $J = 9.7$  Hz, 1H), 4.63 (d,  $J = 7.4$  Hz, 1H), 4.21 (d,  $J = 14.9$  Hz, 1H), 3.27 (m, 1H), 3.18 (s, 1H), 2.33 (d,  $J = 13.7$  Hz, 1H), 2.09-1.62 (m, 2H), 1.56 (s, 2H), 1.04 (s, 9H), 0.97 (s, 9H).  $^{13}C$  NMR (125 MHz,  $CDCl_3$ , ppm):  $\delta$  174.7, 174.1, 169.2, 134.1, 133.2, 128.7, 126.2, 126.0, 126.0, 125.9, 125.0, 121.2, 118.6, 64.5, 63.0, 55.0, 50.0, 34.4, 34.3, 27.0, 26.6, 18.1. MS (EI):  $m/z = 480.6530 [M]^+$ , HRMS calculated for  $C_{33}H_{40}N_4O_3 [M]^+$ : 480.6530; found 480.3100.

## 2.4. General procedure for the asymmetric aldol reaction of various ketones with aromatic aldehydes

The peptide catalyst **6c** (30 mol%) was added to a solution of ketones **15a-h** (0.4 mmol) and the aldehydes **16a-i** (0.1 mmol) under the neat reaction condition. The reaction mixture was stirred at 0 °C for appropriate time until the reaction completion, monitored by thin layer chromatography (TLC). The diastereomeric ratio was determined by  $^1H$  NMR spectroscopic analysis of the crude reaction mixture. Consequently, the reaction mixture was purified by flash column chromatography on  $SiO_2$  (*n*-hexane/ $CH_3CO_2Et$ ) to afford the corresponding aldol products **17a-p**.<sup>[6a-j]</sup>

### Gram scale for the asymmetric aldol reaction of cyclohexanone (15a) with 4-nitrobenzaldehyde (16a)

The peptide catalyst **6c** (30 mol%) was added to a solution of cyclohexanone **15a** (2.06 ml, 19.851 mmol) and the 4-nitrobenzaldehyde **16a** (1g, 6.617 mmol) under neat reaction condition. The reaction mixture was stirred at 0 °C for appropriate time until the reaction completion, monitored by thin layer chromatography (TLC). The diastereomeric ratio was determined by  $^1H$  NMR spectroscopic analysis of the crude reaction mixture. Consequently, the reaction mixture was purified by flash column chromatography on  $SiO_2$  (*n*-hexane/ $CH_3CO_2Et$ ) to afford the 2-[Hydroxy-(4-nitrophenyl)-methyl]-cyclohexan-1-one **17a**. The enantiomeric excess (*ee*) of **17a** was determined by HPLC (CHIRALPAK-AD-H hexane/*i*-PrOH = 90:10 1.0mL /min,  $\lambda = 254$  nm) (1.65g, 98% yield, *dr* = 24:76 and enantiomeric excess 93 %*ee*).

#### 2.4.1. 2-[Hydroxy-(4-nitrophenyl)-methyl]-cyclohexan-1-one (17a)<sup>[6a,9]</sup>

$^1H$  NMR (500 MHz,  $CDCl_3$ , ppm):  $\delta$  8.21-8.19 (m, 2H), 7.51-7.46 (m, 2H), 5.47 (s, H), 4.89 (dd,  $J = 8.6, 2.9$  Hz, 1H), 4.07 (d,  $J = 2.9$  Hz, 1H), 3.18 (d,  $J = 2.9$  Hz, H), 2.64-2.55 (m, 1H), 2.51-2.46 (m, 1H), 2.42-2.32 (m, 1H), 2.14-2.08 (m, 1H), 1.86-1.80 (m, 1H), 1.74-1.64 (m, 1H), 1.63-1.49 (m, 3H), 1.42-1.24 (m, 1H). The *ee* was determined by chiral HPLC: (AD-H column, *n*-hexane/*iso*-propanol = 90/10, flow rate = 1.0 mL/min,  $\lambda = 254$  nm):  $t_{major} = 33.86$  min,  $t_{minor} = 25.58$  min,  $dr(syn/anti) = 20:80$ , 98% *ee* (*anti*).

#### 2.4.2. 2-[Hydroxy-(2-nitrophenyl)-methyl]-cyclohexan-1-one (17b)<sup>[6c]</sup>

$^1H$  NMR (500 MHz,  $CDCl_3$ , ppm):  $\delta$  7.83 (dd,  $J = 8.0, 1.1$  Hz, 1H), 7.75 (dd,  $J = 8.0, 1.1$  Hz, 1H), 7.64-7.58 (m, 1H), 7.43-7.40 (m, 1H), 5.43 (d,  $J = 6.9$  Hz, 1H), 2.77-2.72 (m, 1H), 2.44 (m, 1H), 2.36-2.29 (m, 1H), 2.11-2.06 (m, 1H), 1.86-1.81 (m, 1H), 1.77-1.71 (m, 1H), 1.71-1.53 (m, 3H). The *ee* was determined by chiral HPLC: AD-H column, *n*-hexane/*iso*-propanol: 90/10, flow rate = 1.0 mL/min,  $\lambda = 254$  nm):  $t_{major} = 22.84$  min,  $t_{minor} = 24.55$  min,  $dr(syn/anti) = 22:78$ , 99% *ee* (*anti*).

**2.4.3. 2-[Hydroxy-(3-nitrophenyl)-methyl]-cyclohexan-1-one (17c)** <sup>[6a]</sup>

<sup>1</sup>H NMR (500 MHz, CDCl<sub>3</sub>, ppm): δ 8.22-8.11 (m, 2H), 7.68-7.66 (m, 1H), 7.53 (td, *J* = 7.7, 4.6 Hz, 1H), 5.48 (s, H), 4.90 (dd, *J* = 8.6, 2.9 Hz, 1H), 4.13 (d, *J* = 2.9 Hz, 1H), 3.20 (d, *J* = 3.4 Hz, H), 2.68-2.60 (m, 1H), 2.53-2.47 (m, 1H), 2.44-2.34 (m, 1H), 2.15-2.10 (m, 1H), 1.88-1.82 (m, 1H), 1.79-1.50 (m, 4H), 1.44-1.35 (m, 1H). The ee was determined by chiral HPLC: (*AD-H column, n-hexane/iso propanol* = 90/10, *flow rate* = 1.0 mL/min,  $\lambda$ =254 nm): *t*<sub>major</sub>= 21.76 min, *t*<sub>minor</sub>= 27.55 min, *dr*(*syn/anti*) = 20:80, 99% ee (*anti*).

**2.4.4. 2-[Hydroxy-(2-bromophenyl)-methyl]-cyclohexan-1-one (17d)** <sup>[6]</sup>

<sup>1</sup>H NMR (500 MHz, CDCl<sub>3</sub>, ppm): δ 7.58-7.49 (m, 2H), 7.36-7.30 (m, 1H), 7.13-7.07 (m, 1H), 5.30-5.21 (m, 1H), 3.85 (brs, 1H), 2.76-2.68 (m, 1H), 2.44-2.38 (m, 2H), 2.08-2.0 (m, 1H), 1.80-1.74 (m, 1H), 1.75-1.70 (m, 2H), 1.58-1.54 (m, 2H). The ee was determined by chiral HPLC: *AD-H column, n-hexane/iso propanol* = 90/10, *flow rate* = 1.0 mL/min,  $\lambda$ =224 nm, *dr*(*syn/anti*) = 25:75, 86% ee (*anti*).

**2.4.5. 2-[Hydroxy-(3-bromophenyl)-methyl]-cyclohexan-1-one (17e)** <sup>[6c]</sup>

<sup>1</sup>H NMR (500 MHz, CDCl<sub>3</sub>, ppm): δ 7.49-7.48 (m, 1H), 7.40 (m, 1H), 7.24-7.18 (m, 2H), 5.36 (d, *J* = 1.7 Hz, H), 4.74 (d, *J* = 8.6 Hz, 1H), 4.01 (s, 1H), 3.03 (d, *J* = 45.2 Hz, 0H), 2.61-2.55 (m, 1H), 2.50-2.44 (m, 1H), 2.41-2.32 (m, 1H), 2.10 (m, 1H), 1.88-1.78 (m, 1H), 1.73-1.63 (m, 2H), 1.63-1.48 (m, 2H). The ee was determined by chiral HPLC: (*AD-H column, n-hexane/iso-propanol* = 90/10, *flow rate* = 1.0 mL/min,  $\lambda$ =254 nm): *t*<sub>major</sub>= 12.57 min, *t*<sub>minor</sub>= 14.67 min, *dr*(*syn/anti*) = 25:75, 93% ee (*anti*).

**2.4.6. 2-[Hydroxy-(4-bromophenyl)-methyl]-cyclohexan-1-one (17f)** <sup>[6c]</sup>

<sup>1</sup>H NMR (500 MHz, CDCl<sub>3</sub>, ppm): δ 7.48-7.47 (m, 2H), 7.21-7.18 (m, 2H), 5.35 (s, H), 4.75 (d, *J* = 7.4 Hz, 1H), 4.00 (d, *J* = 4.0 Hz, 1H), 3.06 (s, H), 2.56-2.47 (m, 2H), 2.37 (q, *J* = 5.5 Hz, 1H), 2.11 (d, *J* = 3.4 Hz, 1H), 1.84 (d, *J* = 24.6 Hz, 1H), 1.68 (t, *J* = 12.6 Hz, 2H), 1.56 (t, *J* = 11.5 Hz, 2H), 1.29 (t, *J* = 12.3 Hz, 1H). The ee was determined by chiral HPLC: (*AD-H column, n-hexane/iso-propanol* = 90/10, *flow rate* = 1.0 mL/min,  $\lambda$ =254 nm): *t*<sub>major</sub>= 18.35 min, *t*<sub>minor</sub>= 15.97 min, *dr*(*syn/anti*) = 23:77, 94% ee (*anti*).

**2.4.7. 2-[Hydroxy-(4-chlorophenyl)-methyl]-cyclohexan-1-one (17g)** <sup>[6c]</sup>

<sup>1</sup>H NMR (500 MHz, CDCl<sub>3</sub>, ppm): δ 7.32 (m, 2H), 7.27-7.23 (m, 3H), 5.36 (d, *J* = 2.3 Hz, H), 4.77 (dd, *J* = 8.9, 2.6 Hz, 1H), 3.99 (d, *J* = 2.9 Hz, H), 3.06 (d, *J* = 3.4 Hz, 1H), 2.58-2.53 (m, 1H), 2.51-2.44 (m, 1H), 2.41-2.32 (m, 1H), 2.10 (m, 1H), 1.88-1.79 (m, 1H), 1.72-1.47 (m, 4H). The ee was determined by chiral HPLC: (*AD-H column, n-hexane/iso-propanol* = 90/10, *flow rate* = 1.0 mL/min,  $\lambda$ =254 nm): *t*<sub>major</sub>= 16.19 min, *t*<sub>minor</sub>= 14.30 min, *dr*(*syn/anti*) = 14:86, 98% ee (*anti*).

**2.4.8. 2-[Hydroxy-(4-cyanophenyl)-methyl]-cyclohexan-1-one (17h)** <sup>[6a]</sup>

<sup>1</sup>H NMR (500 MHz, CDCl<sub>3</sub>, ppm): δ 7.66-7.63 (m, 2H), 7.49-7.42 (m, 2H), 5.44 (s, H), 4.84 (dd, *J* = 8.6, 2.9 Hz, 1H), 4.07 (d, *J* = 2.9 Hz, H), 3.16 (d, *J* = 3.4 Hz, 1H), 2.62-2.55 (m, 1H), 2.52-2.46 (m, 1H), 2.43-2.33 (m, 1H), 2.12 (m, 1H), 1.88-1.81 (m, 1H), 1.76-1.65 (m, 2H), 1.64-1.48 (m, 2H), 1.45-1.19 (m, 1H). The ee was determined by chiral HPLC: (*AD-H column, n-hexane/iso-propanol* = 90/10, *flow rate* = 1.0 mL/min,  $\lambda$ =254 nm): *t*<sub>major</sub>= 30.36 min, *t*<sub>minor</sub>= 24.62 min, *dr*(*syn/anti*) = 33:67, 94% ee (*anti*).

**2.4.9. 2-[Hydroxy-phenyl-methyl]-cyclohexan-1-one (17i)** <sup>[6c]</sup>

<sup>1</sup>H NMR (500 MHz, CDCl<sub>3</sub>, ppm): δ 7.35-7.26 (m, 5H), 5.37 (s, H), 4.78 (dd, *J* = 8.6, 2.3 Hz, 1H), 3.98 (d, *J* = 2.9 Hz, 1H), 2.64-2.57 (m, 1H), 2.48-2.43 (m, 1H), 2.38-2.30 (m, 1H), 2.09-2.02 (m, 1H), 1.78-1.72 (m, 1H), 1.70-1.47 (m, 3H), 1.32-1.23 (m, 1H). The ee

was determined by chiral HPLC: (*AD-H column, n-hexane/iso-propanol* = 90/10, *flow rate* = 1.0 mL/min,  $\lambda=254$  nm): *t*<sub>major</sub>= 15.9 min, *t*<sub>minor</sub>= 12.69 min, *dr*(*syn/anti*) = 25:75, 60% *ee* (*anti*).

**2.4.10.** 2-[Hydroxy-(4-(methoxyphenyl) methyl)-cyclopentan-1-one (**17j**)<sup>[8b,d]</sup>

<sup>1</sup>H NMR (500 MHz, CDCl<sub>3</sub>, ppm):  $\delta$  7.24 (d, *J* = 8.9 Hz, 2H), 6.88 (d, *J* = 8.4 Hz, 2H), 4.74 (dd, *J* = 8.9, 1.9 Hz, 1H), 3.93 (d, *J* = 2.4 Hz, 1H), 3.80 (s, 3H), 2.64-2.30 (m, 3H), 2.13-2.05 (m, 1H), 1.81-1.23 (m, 5H). The *ee* was determined by chiral HPLC: (*AD-H column, n-hexane/iso-propanol* = 98/2, *flow rate* = 0.4 mL/min,  $\lambda=254$  nm): *t*<sub>major</sub>= 165.78 min, *t*<sub>minor</sub>= 154.72 min, *dr*(*syn/anti*) = 26:74, 58% *ee* (*anti*).

**2.4.10.** 2-[Hydroxy-(4-(nitrophenyl) methyl)-cyclopentan-1-one (**17n**)<sup>[8b,d]</sup>

<sup>1</sup>H NMR (500 MHz, CDCl<sub>3</sub>, ppm):  $\delta$  8.25-8.20 (m, 2H), 7.57-7.52 (m, 2H), 5.43 (s, 1H), 4.85 (d, *J* = 9.2 Hz, 0H), 2.84 (s, 1H), 2.50-2.36 (m, 2H), 2.33-2.11 (m, 1H), 2.06-1.94 (m, 2H), 1.81-1.68 (m, 2H). The *ee* was determined by chiral HPLC: (*IC column, n-hexane/iso-propanol* = 85/15, *flow rate* = 0.8 mL/min,  $\lambda=254$  nm): *t*<sub>major</sub>= 29.69 min, *t*<sub>minor</sub>= 24.63 min, *dr*(*syn/anti*) = 15:85, 93% *ee* (*anti*).

**2.4.11.** 2-[Hydroxy(4-nitrophenyl) methyl] cycloheptan-1-one (**17m**)<sup>[8b,d]</sup>

<sup>1</sup>H NMR (500 MHz, CDCl<sub>3</sub>, ppm):  $\delta$  8.28-8.21 (m, 2H), 7.60-7.54 (m, 2H), 4.87 (dd, *J* = 9.0, 1.0 Hz, 1H), 4.77 (d, *J* = 1.0 Hz, 1H), 2.56-2.26 (m, 3H), 2.11-1.99 (m, 1H), 1.85-1.71 (m, 2H), 1.62-1.53 (m, 1H). The *ee* was determined by chiral HPLC: (*AD-H column, n-hexane/iso-propanol* = 90/10, *flow rate* = 1.0 mL/min,  $\lambda=254$  nm): *t*<sub>major</sub>= 48.1 min, *t*<sub>minor</sub>= 20.70 min, *dr* (*syn/anti*) = 15:85, 91% *ee* (*anti*).

**2.4.12.** 2-[Hydroxy-(4-(nitrophenyl)-methyl)-4-methylcyclohexan-1-one (**17o**)<sup>[8b]</sup>

<sup>1</sup>H NMR (500 MHz, CDCl<sub>3</sub>, ppm):  $\delta$  8.21 (d, *J* = 8.6 Hz, 2H), 7.51-7.46 (m, 2H), 4.89 (m, 1H), 4.00 (dd, *J* = 105.4, 2.9 Hz, 1H), 2.76-2.36 (m, 3H), 2.11-1.76 (m, 3H), 1.62-1.56 (m, 2H), 1.48-1.23 (m, 2H), 0.96 (dd, *J* = 81.3, 12.6 Hz, 3H). The *ee* was determined by chiral HPLC: (*AD-H column, n-hexane/iso-propanol*: 90/10, *flow Rate* = 1.0 mL/min,  $\lambda=254$  nm): *t*<sub>major</sub>= 32.36 min, *t*<sub>minor</sub>= 34.44 min, *dr* (*syn/anti*) = 21:79, 90% *ee* (*anti*).

**2.4.13.** 6-[Hydroxy-(4-nitro-phenyl)-methyl]-2,2-dimethyl-1,3-dioxan-5-one (**17p**)<sup>[8a]</sup>

<sup>1</sup>H NMR (500 MHz, CDCl<sub>3</sub>, ppm):  $\delta$  8.21 (dd, *J* = 8.9, 2.0 Hz, 2H), 7.61-7.55 (m, 2H), 5.00 (d, *J* = 8.0 Hz, 1H), 4.29 (dd, *J* = 17.5, 1.4 Hz, 1H), 4.22 (dd, *J* = 7.7, 1.4 Hz, 1H), 4.09 (dd, *J* = 17.5, 2.6 Hz, 1H), 1.39 (s, 3H), 1.21 (s, 3H). The *ee* was determined by chiral HPLC: (*AD-H column, n-hexane/iso-propanol*: 95/05, *flow Rate* = 1.0 mL/min,  $\lambda=254$  nm): *t*<sub>major</sub>= 55.87 min, *t*<sub>minor</sub>= 42.13 min, *dr*(*syn/anti*) = 30:70, 68% *ee* (*anti*).

**2.4.14.** 3-[Hydroxy-[4-(nitrophenyl) methyl] dihydro-2H-pyran-4-one (**17q**)<sup>[8b]</sup>

<sup>1</sup>H NMR (500 MHz, CDCl<sub>3</sub>, ppm):  $\delta$  8.23 (m, 2H), 7.53-7.50 (m, 2H), 5.55 (s, H), 4.98 (d, *J* = 8.0 Hz, 1H), 4.27-4.19 (m, 1H), 3.85 (m, 1H), 3.78-3.69 (m, 2H), 3.47-3.41 (m, 1H), 2.96-2.87 (m, 1H), 2.76-2.65 (m, 1H), 2.55-2.46 (m, 1H). The *ee* was determined by chiral HPLC: (*AD-H column, n-hexane/iso-propanol* = 90/10, *flow rate* = 1.0 mL/min,  $\lambda=254$  nm): *t*<sub>major</sub>= 59.75 min, *t*<sub>minor</sub>= 50.60 min, *dr*(*syn/anti*) = 13:87, 94% *ee* (*anti*).

**2.4.15.** 3-Hydroxy-3-(4-nitrophenyl)-1-propan-1-one (**17r**)<sup>[8f]</sup>

<sup>1</sup>H NMR (500 MHz, CDCl<sub>3</sub>, ppm): δ 8.21 (dt, *J* = 9.0, 2.0 Hz, 2H), 7.54 (d, *J* = 8.6 Hz, 2H), 5.29-5.25 (m, 1H), 3.65 (d, *J* = 3.4 Hz, 1H), 2.87-2.83 (m, 2H), 2.23 (s, 3H). The ee was determined by chiral HPLC: (*AS-H* column, *n*-hexane/*iso*-propanol: 90/10, flow Rate = 1.0 mL/min, λ=254 nm): *t*<sub>major</sub>= 18.36 min, *t*<sub>minor</sub>= 13.9 min, *dr*(*syn/anti*) = *n.d.*, 52% ee.

**2.4.16.** 3-Hydroxy-3-(4-nitrophenyl)-1-phenylpropan-1-one (**17s**)<sup>[8b]</sup>

<sup>1</sup>H NMR (500 MHz, CDCl<sub>3</sub>, ppm): δ 8.25–7.46 (m, 9H), 5.46 (d, *J* = 8.6 Hz, 1H), 3.90 (d, *J* = 2.9 Hz, 1H), 3.44–3.31 (m, 2H). The ee was determined by chiral HPLC: (*AD-H* column, *n*-hexane/*iso*-propanol: 90/10, flow Rate = 1.0 mL/min, λ=254 nm): *t*<sub>major</sub>= 34.14 min, *t*<sub>minor</sub>= 39.27 min, *dr*(*syn/anti*) = *n.d.*, 82% ee.

### 3. Theoretical Calculations

The DFT method (at the B3LYP/6-31G(d) level of theory) was used to perform the conformational analysis with Gaussian 16 program package. The Gas phase geometry optimizations were performed using the B3LYP hybrid density functional and the 6-31G(d) basis set as implemented in the Gaussian 16. Vibrational mode analysis was performed for all structures to ensure that they have zero (for a ground state) or one (for a transition state) imaginary frequency.

1) Gaussian 16, Revision A.03,

M. J. Frisch, G. W. Trucks, H. B. Schlegel, G. E. Scuseria, M. A. Robb, J. R. Cheeseman, G. Scalmani, V. Barone, G. A. Petersson, H. Nakatsuji, X. Li, M. Caricato, A. V. Marenich, J. Bloino, B. G. Janesko, R. Gomperts, B. Mennucci, H. P. Hratchian, J. V. Ortiz, A. F. Izmaylov, J. L. Sonnenberg, D. Williams-Young, F. Ding, F. Lipparini, F. Egidi, J. Goings, B. Peng, A. Petrone, T. Henderson, D. Ranasinghe, V. G. Zakrzewski, J. Gao, N. Rega, G. Zheng, W. Liang, M. Hada, M. Ehara, K. Toyota, R. Fukuda, J. Hasegawa, M. Ishida, T. Nakajima, Y. Honda, O. Kitao, H. Nakai, T. Vreven, K. Throssell, J. A. Montgomery, Jr., J. E. Peralta, F. Ogliaro, M. J. Bearpark, J. J. Heyd, E. N. Brothers, K. N. Kudin, V. N. Staroverov, T. A. Keith, R. Kobayashi, J. Normand, K. Raghavachari, A. P. Rendell, J. C. Burant, S. S. Iyengar, J. Tomasi, M. Cossi, J. M. Millam, M. Klene, C. Adamo, R. Cammi, J. W. Ochterski, R. L. Martin, K. Morokuma, O. Farkas, J. B. Foresman, and D. J. Fox, Gaussian, Inc., Wallingford CT, 2016.

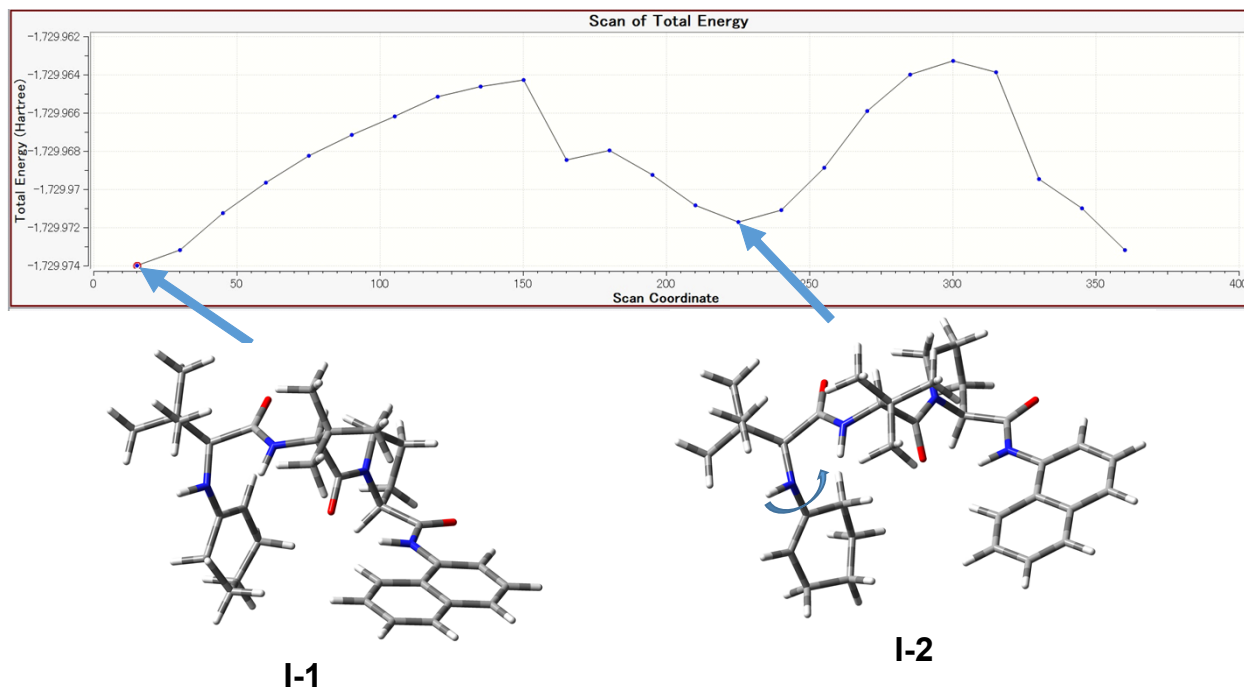

Ratio I-1 : I-2 = 96.14 : 3.86

**Figure S1.** The coordinate scan calculations (at the B3LYP/6-31G(d) level of theory) and total energies (in hartree, calculated at the B3LYP/6-31G(d) level of theory in gas phase) of **6c** generated by varying two torsion angles (the dihedral scans showed with u-shaped arrows, as shown in the bottom structures).

Table S1. Cartesian coordinates (Angstroms) for I-1 in gas phase.

Point Group: C1

Imaginary Freq: 0

Total energy = -1729.297620 hartree

| Symbol | X        | Y        | Z        |
|--------|----------|----------|----------|
| C      | -4.49757 | -0.46142 | 1.037219 |
| C      | -3.41505 | -0.88272 | 1.860457 |
| C      | -3.61771 | -1.73187 | 2.927445 |
| C      | -4.91203 | -2.20898 | 3.233678 |
| C      | -5.98055 | -1.8197  | 2.460511 |
| C      | -5.81235 | -0.94465 | 1.353602 |
| C      | -6.92297 | -0.54508 | 0.565208 |
| C      | -6.74187 | 0.303832 | -0.49938 |
| C      | -5.46032 | 0.791319 | -0.83497 |
| C      | -4.34993 | 0.422096 | -0.09184 |
| N      | -3.05418 | 0.889281 | -0.39962 |
| C      | -2.66623 | 1.751865 | -1.39003 |
| O      | -3.40928 | 2.298002 | -2.19775 |
| C      | -1.1338  | 2.008465 | -1.39628 |
| C      | -0.73191 | 3.060562 | -2.43486 |
| C      | -0.50229 | 2.233577 | -3.7091  |
| C      | 0.155118 | 0.943637 | -3.19688 |
| N      | -0.37235 | 0.806185 | -1.81639 |
| C      | -0.01448 | -0.12661 | -0.90364 |
| C      | 0.978817 | -1.22341 | -1.32241 |
| O      | -0.44021 | -0.08936 | 0.265267 |
| C      | 0.36532  | -2.66443 | -1.30656 |
| C      | 0.070519 | -3.16401 | 0.120565 |
| C      | 1.376213 | -3.61478 | -1.97768 |
| C      | -0.93965 | -2.65885 | -2.1278  |
| N      | 2.149876 | -1.08598 | -0.46259 |
| C      | 3.273934 | -0.43955 | -0.89222 |
| O      | 3.474703 | -0.12178 | -2.06289 |
| C      | 4.320738 | -0.14619 | 0.207987 |
| N      | 3.654384 | 0.083426 | 1.486207 |
| C      | 3.081032 | 1.341093 | 1.770359 |
| C      | 2.714845 | 1.510583 | 3.231157 |
| C      | 1.714723 | 2.651951 | 3.457827 |



|   |          |          |          |
|---|----------|----------|----------|
| C | 2.135781 | 3.901499 | 2.677294 |
| C | 2.169967 | 3.608428 | 1.17064  |
| C | 2.8321   | 2.289543 | 0.847939 |
| C | 5.43236  | -1.24934 | 0.314325 |
| C | 6.543652 | -0.74213 | 1.260567 |
| C | 4.873876 | -2.58406 | 0.846418 |
| C | 6.062742 | -1.48112 | -1.07398 |
| H | -2.4022  | -0.54559 | 1.667771 |
| H | -2.77172 | -2.03523 | 3.538323 |
| H | -5.05899 | -2.87835 | 4.077033 |
| H | -6.98288 | -2.17685 | 2.685536 |
| H | -7.91082 | -0.9201  | 0.820488 |
| H | -7.59076 | 0.612848 | -1.10349 |
| H | -5.33245 | 1.458681 | -1.67475 |
| H | -2.27553 | 0.510829 | 0.137428 |
| H | -0.81917 | 2.266964 | -0.3798  |
| H | 0.196225 | 3.548387 | -2.1159  |
| H | -1.50872 | 3.816293 | -2.5587  |
| H | 0.125779 | 2.741375 | -4.44651 |
| H | -1.468   | 2.011993 | -4.17334 |
| H | 1.24761  | 1.021582 | -3.169   |
| H | -0.11375 | 0.07321  | -3.80281 |
| H | 1.343051 | -1.03492 | -2.33211 |
| H | -0.34853 | -4.17632 | 0.077202 |
| H | -0.64318 | -2.51811 | 0.636879 |
| H | 0.985889 | -3.21613 | 0.721453 |
| H | 0.988921 | -4.64036 | -1.98068 |
| H | 2.333306 | -3.61827 | -1.44579 |
| H | 1.5699   | -3.32558 | -3.0178  |
| H | -1.34404 | -3.67488 | -2.19854 |
| H | -0.77056 | -2.30164 | -3.15163 |
| H | -1.71062 | -2.03037 | -1.66887 |
| H | 1.998529 | -1.06114 | 0.54121  |
| H | 4.822879 | 0.770719 | -0.13436 |
| H | 4.155623 | -0.29597 | 2.280363 |

|   |          |          |          |
|---|----------|----------|----------|
| H | 3.631359 | 1.695372 | 3.815079 |
| H | 2.299461 | 0.565286 | 3.606574 |
| H | 1.633507 | 2.86791  | 4.529957 |
| H | 0.720207 | 2.330421 | 3.12014  |
| H | 3.135167 | 4.214879 | 3.010734 |
| H | 1.455321 | 4.735992 | 2.886177 |
| H | 2.691152 | 4.420873 | 0.645036 |
| H | 1.140331 | 3.61859  | 0.773863 |
| H | 3.089748 | 2.121073 | -0.1944  |
| H | 7.365438 | -1.46643 | 1.294361 |
| H | 6.199094 | -0.60264 | 2.292336 |
| H | 6.952249 | 0.21381  | 0.912904 |
| H | 5.680161 | -3.32292 | 0.920909 |
| H | 4.106245 | -2.99047 | 0.180664 |
| H | 4.429431 | -2.48393 | 1.843608 |
| H | 6.892355 | -2.19247 | -0.98651 |
| H | 6.456516 | -0.54894 | -1.49345 |
| H | 5.342439 | -1.88199 | -1.79134 |

Table S2. Cartesian coordinates (Angstroms) for **TS-1** in gas phase.

Point Group: C1

Imaginary Freq: 1

Total energy = -1729.287407 hartree

| Symbol | X        | Y        | Z        |
|--------|----------|----------|----------|
| C      | -0.00399 | -0.00636 | 0.005573 |
| C      | -0.00781 | -0.00926 | 1.42932  |
| C      | 1.169509 | -0.01472 | 2.146598 |
| C      | 2.417601 | -0.01743 | 1.484094 |
| C      | 2.457533 | -0.01665 | 0.109509 |
| C      | 1.266011 | -0.01241 | -0.66477 |
| C      | 1.318721 | -0.01598 | -2.0832  |
| C      | 0.156552 | -0.01447 | -2.81542 |
| C      | -1.10528 | -0.00603 | -2.1827  |
| C      | -1.19929 | 0.000285 | -0.7997  |
| N      | -2.44391 | 0.007678 | -0.1342  |
| C      | -3.70351 | -0.01238 | -0.67117 |

|   |          |          |          |
|---|----------|----------|----------|
| O | -3.97383 | -0.05627 | -1.86609 |
| C | -4.81809 | 0.007488 | 0.411421 |
| C | -6.21547 | -0.13097 | -0.2012  |
| C | -6.61464 | 1.320414 | -0.50823 |
| C | -6.04929 | 2.116858 | 0.677151 |
| N | -4.88324 | 1.310144 | 1.117923 |
| C | -4.09983 | 1.540797 | 2.198007 |
| C | -4.3668  | 2.800531 | 3.041448 |
| O | -3.2045  | 0.743699 | 2.531851 |
| C | -3.1759  | 3.817824 | 3.036681 |
| C | -1.95314 | 3.30016  | 3.818365 |
| C | -3.6696  | 5.129292 | 3.678367 |
| C | -2.7682  | 4.098161 | 1.576117 |
| N | -4.74163 | 2.362394 | 4.380832 |
| C | -6.0486  | 2.229016 | 4.750077 |
| O | -6.99472 | 2.614513 | 4.063936 |
| C | -6.27656 | 1.562508 | 6.126232 |
| N | -5.18585 | 0.630115 | 6.413547 |
| C | -5.14507 | -0.63911 | 5.732577 |
| C | -6.44784 | -1.28514 | 5.295012 |
| C | -6.27349 | -2.77247 | 4.946704 |
| C | -5.01932 | -3.0022  | 4.096909 |
| C | -3.764   | -2.55873 | 4.860248 |
| C | -3.95486 | -1.22302 | 5.531392 |
| C | -6.47009 | 2.601661 | 7.288813 |
| C | -6.90722 | 1.844771 | 8.563655 |
| C | -5.17716 | 3.388181 | 7.579138 |
| C | -7.59589 | 3.589107 | 6.920364 |
| H | -0.93899 | -0.00567 | 1.985729 |
| H | 1.13464  | -0.0174  | 3.23273  |
| H | 3.338793 | -0.02132 | 2.060545 |
| H | 3.410688 | -0.02058 | -0.41426 |
| H | 2.289088 | -0.02154 | -2.57309 |
| H | 0.194015 | -0.01879 | -3.90153 |
| H | -2.01126 | -0.00559 | -2.77102 |

|   |          |          |          |
|---|----------|----------|----------|
| H | -2.43687 | 0.089447 | 0.881374 |
| H | -4.59555 | -0.76746 | 1.152596 |
| H | -6.89368 | -0.57167 | 0.538441 |
| H | -6.20057 | -0.76051 | -1.09191 |
| H | -7.69485 | 1.458908 | -0.6087  |
| H | -6.13888 | 1.634389 | -1.44214 |
| H | -6.76828 | 2.202595 | 1.498894 |
| H | -5.73466 | 3.123396 | 0.385016 |
| H | -5.24299 | 3.323002 | 2.658237 |
| H | -1.14798 | 4.043265 | 3.776217 |
| H | -1.57754 | 2.36129  | 3.405599 |
| H | -2.19176 | 3.141804 | 4.876686 |
| H | -2.86085 | 5.869071 | 3.699901 |
| H | -4.00488 | 4.967957 | 4.708023 |
| H | -4.50533 | 5.562023 | 3.114924 |
| H | -1.99409 | 4.873129 | 1.544307 |
| H | -3.61769 | 4.458868 | 0.982219 |
| H | -2.36095 | 3.207529 | 1.08566  |
| H | -4.08392 | 1.80578  | 4.917137 |
| H | -7.24647 | 1.0574   | 6.014455 |
| H | -5.03137 | 0.518512 | 7.40864  |
| H | -6.86378 | -0.74588 | 4.430151 |
| H | -7.19501 | -1.18062 | 6.094116 |
| H | -7.16865 | -3.13969 | 4.430076 |
| H | -6.18629 | -3.35207 | 5.876392 |
| H | -5.10051 | -2.41946 | 3.168369 |
| H | -4.93687 | -4.05605 | 3.80494  |
| H | -2.90806 | -2.4973  | 4.175156 |
| H | -3.49076 | -3.3211  | 5.608069 |
| H | -3.0609  | -0.70025 | 5.868119 |
| H | -7.13915 | 2.560291 | 9.360733 |
| H | -6.13208 | 1.175802 | 8.956837 |
| H | -7.80722 | 1.24572  | 8.380206 |
| H | -5.33687 | 4.075445 | 8.418254 |
| H | -4.86985 | 3.983202 | 6.713424 |

|   |          |          |          |
|---|----------|----------|----------|
| H | -4.34319 | 2.728519 | 7.842031 |
| H | -7.77597 | 4.271026 | 7.759853 |
| H | -8.53248 | 3.06359  | 6.703072 |
| H | -7.34684 | 4.186745 | 6.040322 |

Table S3. Cartesian coordinates (Angstroms) for I-2 in gas phase.

Point Group: C1

Imaginary Freq: 0

Total energy = -1729.294587 hartree

| Symbol | X        | Y        | Z        |
|--------|----------|----------|----------|
| C      | -4.49281 | 1.137375 | 0.376766 |
| C      | -3.3592  | 1.921935 | 0.732478 |
| C      | -3.48268 | 3.027202 | 1.547174 |
| C      | -4.74453 | 3.412478 | 2.053158 |
| C      | -5.86085 | 2.678786 | 1.726615 |
| C      | -5.77443 | 1.534527 | 0.888494 |
| C      | -6.93387 | 0.787645 | 0.552845 |
| C      | -6.83175 | -0.31389 | -0.26141 |
| C      | -5.58419 | -0.72921 | -0.775   |
| C      | -4.42825 | -0.02874 | -0.4676  |
| N      | -3.16415 | -0.41685 | -0.96125 |
| C      | -2.85194 | -1.4527  | -1.80108 |
| O      | -3.65001 | -2.23931 | -2.29779 |
| C      | -1.33009 | -1.54391 | -2.10088 |
| C      | -1.01121 | -2.62796 | -3.13538 |
| C      | -0.8186  | -3.89047 | -2.28167 |
| C      | -0.0988  | -3.37834 | -1.02571 |
| N      | -0.55734 | -1.9709  | -0.90768 |
| C      | -0.12623 | -1.05346 | -0.01268 |
| C      | 0.854866 | -1.49911 | 1.088282 |
| O      | -0.48732 | 0.137221 | -0.0794  |
| C      | 0.241624 | -1.43612 | 2.528278 |
| C      | -0.00228 | 0.009066 | 3.005741 |
| C      | 1.222906 | -2.12953 | 3.494006 |
| C      | -1.095   | -2.20514 | 2.534514 |
| N      | 2.069371 | -0.70517 | 0.961448 |

|   |          |          |          |
|---|----------|----------|----------|
| C | 3.079873 | -1.07875 | 0.127608 |
| O | 3.113702 | -2.15965 | -0.46105 |
| C | 4.219468 | -0.04356 | -0.018   |
| N | 3.744635 | 1.309513 | 0.32777  |
| C | 3.376391 | 2.217244 | -0.70188 |
| C | 2.376693 | 1.705218 | -1.71662 |
| C | 2.205221 | 2.670375 | -2.89953 |
| C | 2.06252  | 4.115402 | -2.41037 |
| C | 3.324399 | 4.55316  | -1.6521  |
| C | 3.812741 | 3.488878 | -0.70053 |
| C | 5.506093 | -0.44169 | 0.794647 |
| C | 6.623469 | 0.583081 | 0.497098 |
| C | 5.228496 | -0.48125 | 2.310962 |
| C | 6.009382 | -1.82698 | 0.338777 |
| H | -2.36845 | 1.669451 | 0.369981 |
| H | -2.59923 | 3.607226 | 1.799971 |
| H | -4.82909 | 4.285446 | 2.694757 |
| H | -6.83902 | 2.965004 | 2.106223 |
| H | -7.89565 | 1.104173 | 0.948348 |
| H | -7.71824 | -0.88608 | -0.52173 |
| H | -5.51832 | -1.59752 | -1.41429 |
| H | -2.34929 | 0.092487 | -0.62361 |
| H | -0.97356 | -0.55181 | -2.39599 |
| H | -0.08377 | -2.36853 | -3.65821 |
| H | -1.81583 | -2.73216 | -3.86454 |
| H | -0.24115 | -4.66922 | -2.78783 |
| H | -1.79822 | -4.30228 | -2.02086 |
| H | 0.990577 | -3.39418 | -1.13666 |
| H | -0.37019 | -3.94991 | -0.13313 |
| H | 1.16187  | -2.52939 | 0.907542 |
| H | -0.44987 | -0.00649 | 4.006437 |
| H | -0.67471 | 0.549788 | 2.336244 |
| H | 0.934556 | 0.573827 | 3.08299  |
| H | 0.827117 | -2.10851 | 4.516083 |
| H | 2.196789 | -1.62953 | 3.499596 |

|   |          |          |          |
|---|----------|----------|----------|
| H | 1.382339 | -3.17926 | 3.218232 |
| H | -1.50168 | -2.24146 | 3.55134  |
| H | -0.96632 | -3.24088 | 2.195781 |
| H | -1.84719 | -1.72759 | 1.897447 |
| H | 2.047681 | 0.285957 | 1.181402 |
| H | 4.50593  | -0.08848 | -1.07611 |
| H | 4.357597 | 1.764399 | 0.994687 |
| H | 1.412958 | 1.539792 | -1.21356 |
| H | 2.68549  | 0.71976  | -2.09122 |
| H | 1.332305 | 2.371749 | -3.49242 |
| H | 3.078592 | 2.597751 | -3.56268 |
| H | 1.193134 | 4.183161 | -1.74188 |
| H | 1.871164 | 4.79302  | -3.25132 |
| H | 3.126367 | 5.483519 | -1.10085 |
| H | 4.120833 | 4.804528 | -2.3718  |
| H | 4.546948 | 3.794878 | 0.046514 |
| H | 7.555968 | 0.263535 | 0.976006 |
| H | 6.39977  | 1.588647 | 0.87074  |
| H | 6.809484 | 0.6632   | -0.58025 |
| H | 6.150901 | -0.71665 | 2.854338 |
| H | 4.488086 | -1.2477  | 2.562021 |
| H | 4.859685 | 0.476761 | 2.697293 |
| H | 6.931686 | -2.07576 | 0.877345 |
| H | 6.233567 | -1.83316 | -0.73403 |
| H | 5.275211 | -2.61321 | 0.52349  |

Table S4. Cartesian coordinates (Angstroms) for **TS-2** in gas phase.

Point Group: C1

Imaginary Freq: 1

Total energy = -1729.285376 hartree

| Symbol | X        | Y        | Z        |
|--------|----------|----------|----------|
| C      | -4.53233 | 1.041345 | 0.406089 |
| C      | -3.42473 | 1.821816 | 0.843175 |
| C      | -3.58989 | 2.859493 | 1.73566  |
| C      | -4.86993 | 3.177425 | 2.242724 |
| C      | -5.96206 | 2.445736 | 1.838985 |

|   |          |          |          |
|---|----------|----------|----------|
| C | -5.83255 | 1.370096 | 0.919471 |
| C | -6.96725 | 0.624912 | 0.504919 |
| C | -6.82323 | -0.40955 | -0.38727 |
| C | -5.55664 | -0.75687 | -0.90472 |
| C | -4.42363 | -0.05592 | -0.52198 |
| N | -3.1417  | -0.37726 | -1.01704 |
| C | -2.78934 | -1.33883 | -1.92679 |
| O | -3.55977 | -2.10175 | -2.49844 |
| C | -1.26038 | -1.37385 | -2.20038 |
| C | -0.89591 | -2.37096 | -3.30477 |
| C | -0.6946  | -3.68941 | -2.54259 |
| C | -0.01327 | -3.25818 | -1.23565 |
| N | -0.50046 | -1.87081 | -1.02625 |
| C | -0.10237 | -1.01092 | -0.0618  |
| C | 0.873322 | -1.51368 | 1.019951 |
| O | -0.49434 | 0.17211  | -0.04975 |
| C | 0.244371 | -1.54342 | 2.454006 |
| C | -0.01319 | -0.13309 | 3.020298 |
| C | 1.21615  | -2.29359 | 3.386446 |
| C | -1.08842 | -2.31722 | 2.395034 |
| N | 2.087751 | -0.71271 | 0.954462 |
| C | 3.09529  | -1.01607 | 0.089926 |
| O | 3.116666 | -2.0367  | -0.59873 |
| C | 4.252332 | 0.007607 | 0.047571 |
| N | 3.770251 | 1.3423   | 0.459673 |
| C | 3.325126 | 2.243728 | -0.59488 |
| C | 1.913054 | 2.762043 | -0.43889 |
| C | 1.400877 | 3.478277 | -1.69839 |
| C | 2.472126 | 4.400704 | -2.29152 |
| C | 3.722751 | 3.597705 | -2.67874 |
| C | 4.124034 | 2.617053 | -1.60327 |
| C | 5.496908 | -0.45984 | 0.888644 |
| C | 6.66612  | 0.519911 | 0.642289 |
| C | 5.176915 | -0.50915 | 2.395965 |
| C | 5.956988 | -1.85689 | 0.423343 |



|   |          |          |          |
|---|----------|----------|----------|
| H | -2.42171 | 1.61903  | 0.48333  |
| H | -2.72542 | 3.438141 | 2.049867 |
| H | -4.98746 | 3.997386 | 2.946111 |
| H | -6.9538  | 2.680657 | 2.218603 |
| H | -7.94366 | 0.889058 | 0.903028 |
| H | -7.69066 | -0.9803  | -0.70803 |
| H | -5.45798 | -1.57266 | -1.60594 |
| H | -2.34527 | 0.123138 | -0.62614 |
| H | -0.92157 | -0.35488 | -2.4135  |
| H | 0.037081 | -2.05458 | -3.78448 |
| H | -1.68185 | -2.43653 | -4.05843 |
| H | -0.08905 | -4.41612 | -3.09154 |
| H | -1.67047 | -4.13944 | -2.33659 |
| H | 1.078158 | -3.24577 | -1.32057 |
| H | -0.29535 | -3.89774 | -0.3938  |
| H | 1.184084 | -2.53085 | 0.779884 |
| H | -0.47339 | -0.21533 | 4.012021 |
| H | -0.68011 | 0.44557  | 2.377769 |
| H | 0.918978 | 0.430601 | 3.146883 |
| H | 0.804371 | -2.3435  | 4.401201 |
| H | 2.18631  | -1.78957 | 3.441774 |
| H | 1.387431 | -3.32149 | 3.043741 |
| H | -1.50504 | -2.42346 | 3.4029   |
| H | -0.95063 | -3.32718 | 1.988778 |
| H | -1.83652 | -1.80147 | 1.783609 |
| H | 2.095189 | 0.244213 | 1.293928 |
| H | 4.571632 | 0.01232  | -1.00247 |
| H | 4.481972 | 1.80987  | 1.011819 |
| H | 1.881927 | 3.443695 | 0.426963 |
| H | 1.243817 | 1.931491 | -0.18512 |
| H | 0.489362 | 4.04075  | -1.46369 |
| H | 1.119876 | 2.725682 | -2.44844 |
| H | 2.747    | 5.161372 | -1.54737 |
| H | 2.083209 | 4.938256 | -3.16487 |
| H | 4.561881 | 4.276393 | -2.88529 |

|   |          |          |          |
|---|----------|----------|----------|
| H | 3.546008 | 3.055895 | -3.62172 |
| H | 5.129483 | 2.201318 | -1.66795 |
| H | 7.562409 | 0.168886 | 1.166257 |
| H | 6.465467 | 1.535921 | 1.002745 |
| H | 6.908408 | 0.585213 | -0.42521 |
| H | 6.071461 | -0.7965  | 2.960892 |
| H | 4.394675 | -1.24348 | 2.613066 |
| H | 4.840141 | 0.459782 | 2.782269 |
| H | 6.863531 | -2.14419 | 0.969515 |
| H | 6.190277 | -1.86259 | -0.64725 |
| H | 5.19458  | -2.61955 | 0.593736 |

#### 4. $^1\text{H}$ & $^{13}\text{C}$ NMR SPECTRA

L-Pro-Ph (**3a**) (Chemical Formula:  $\text{C}_{11}\text{H}_{14}\text{N}_2\text{O}$ )

##### $^1\text{H}$ -NMR

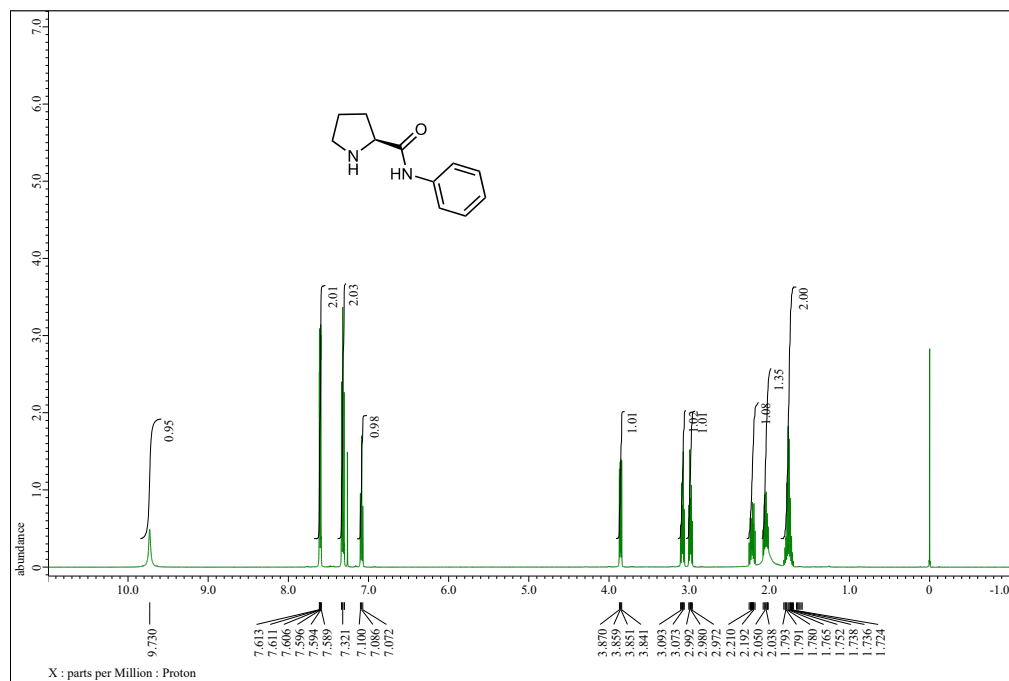

##### $^{13}\text{C}$ -NMR

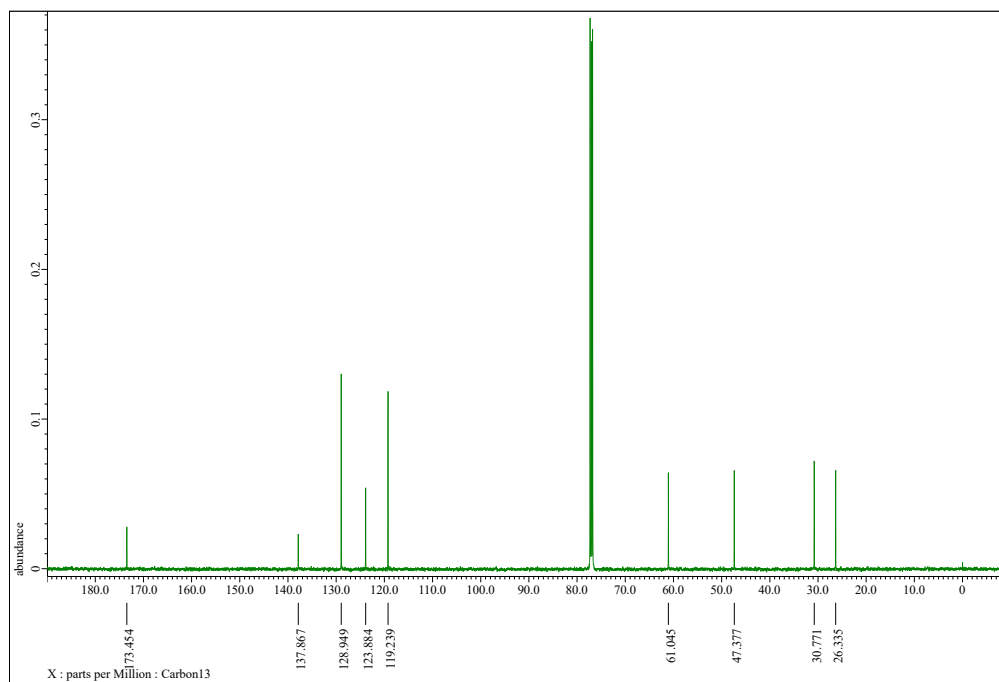

### L-Pro-1-Naph (3b) (Chemical Formula: C<sub>15</sub>H<sub>16</sub>N<sub>2</sub>O)

#### <sup>1</sup>H-NMR

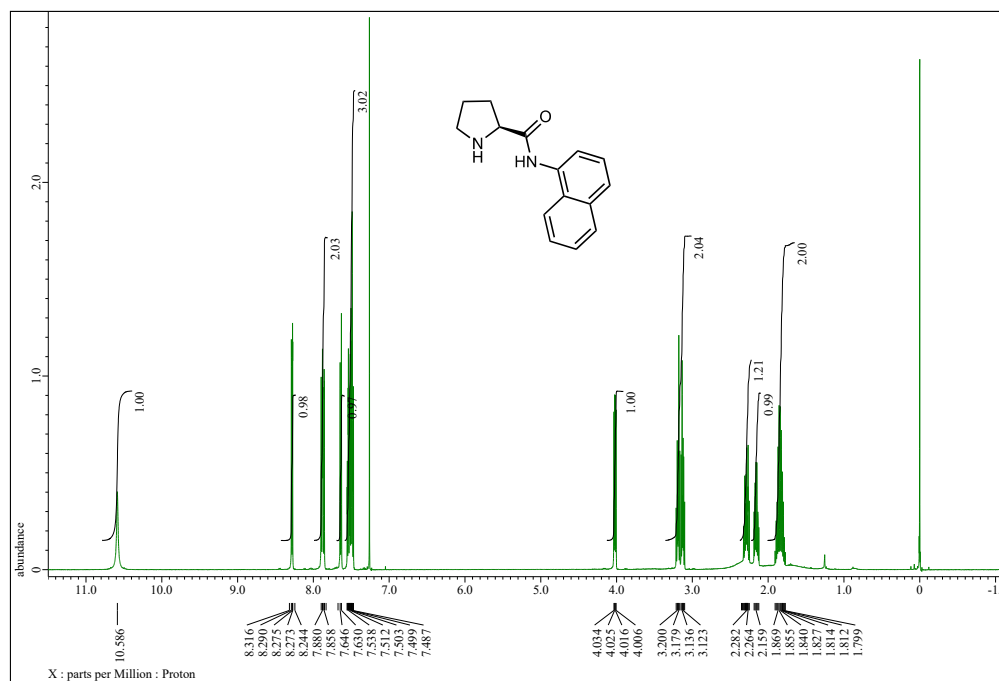

#### <sup>13</sup>C-NMR

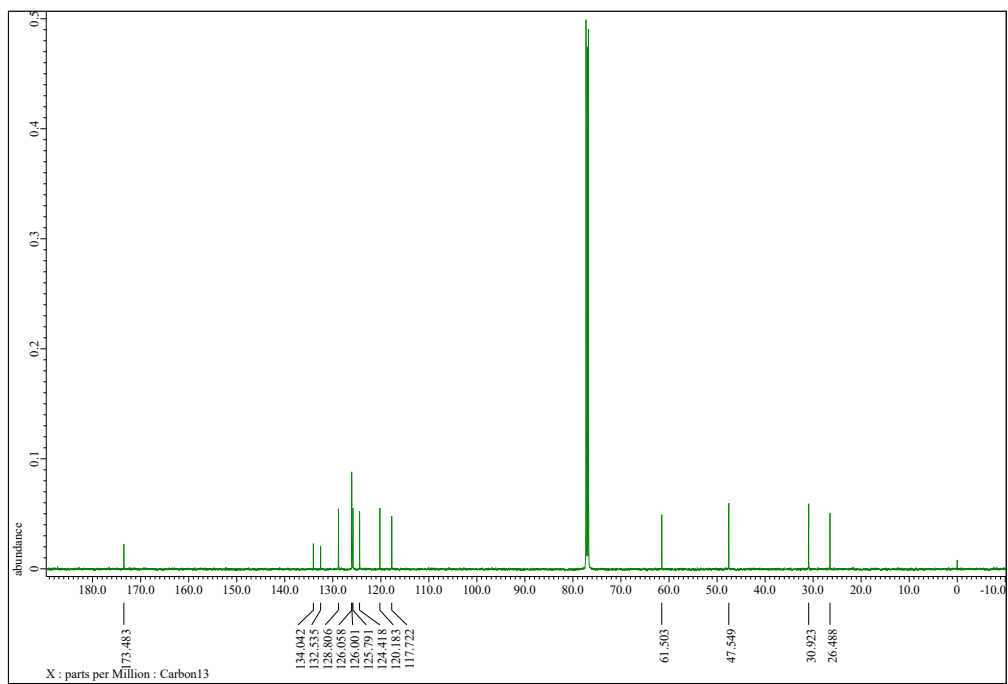

**L-Pro-1-Anth (3c)** (Chemical Formula:  $C_{19}H_{18}N_2O$ )

**$^1H$ -NMR**

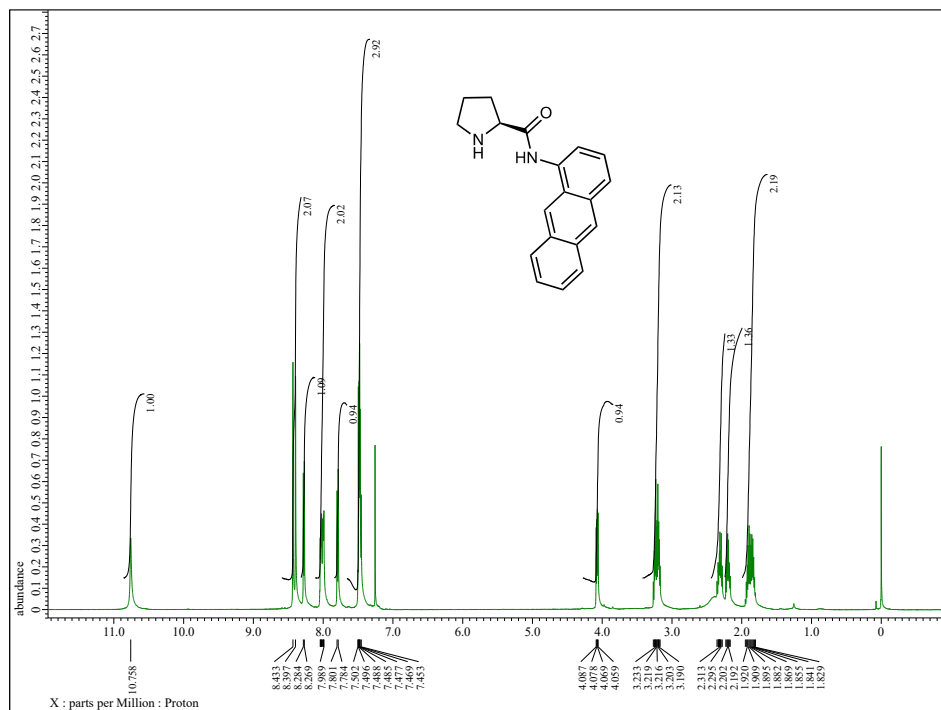

## <sup>13</sup>C-NMR

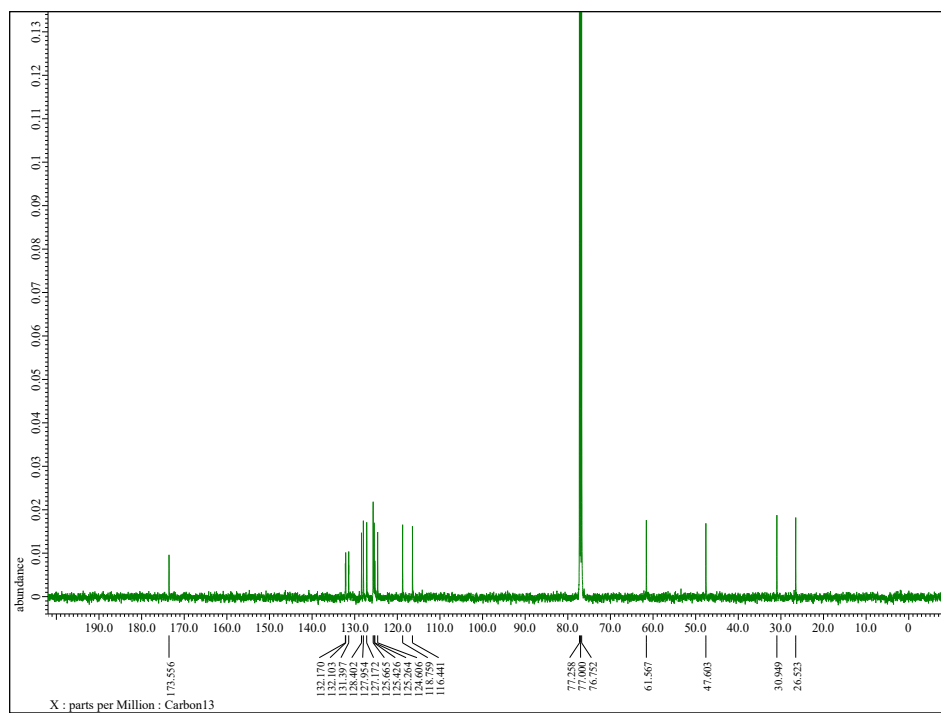

## L-Pro-1-Pyr (3d) (Chemical Formula: C<sub>21</sub>H<sub>18</sub>N<sub>2</sub>O)

### <sup>1</sup>H-NMR

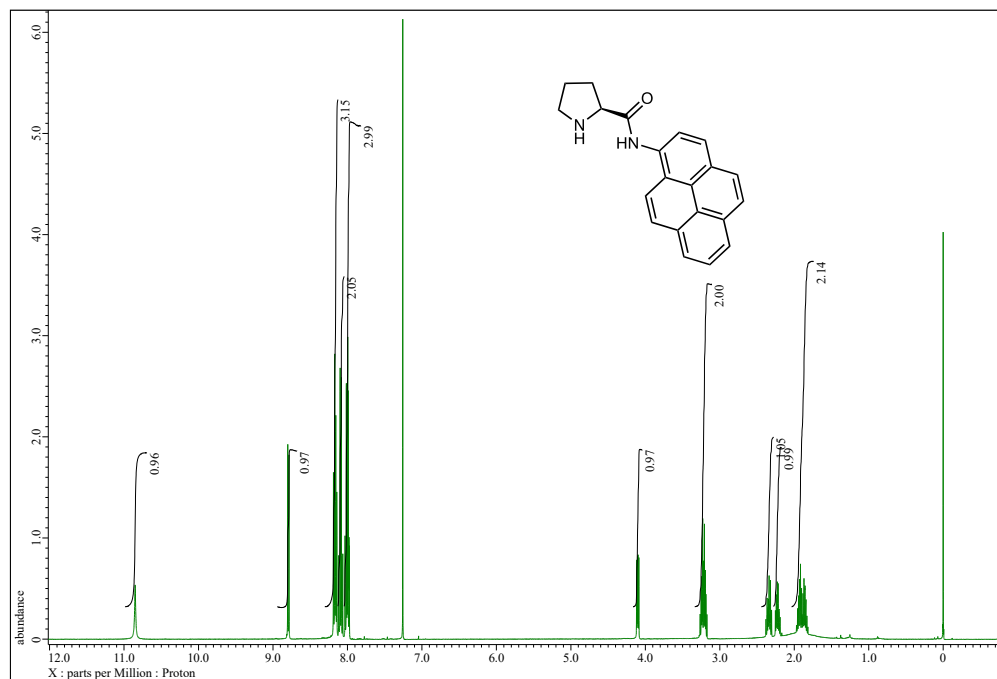

# <sup>13</sup>C-NMR

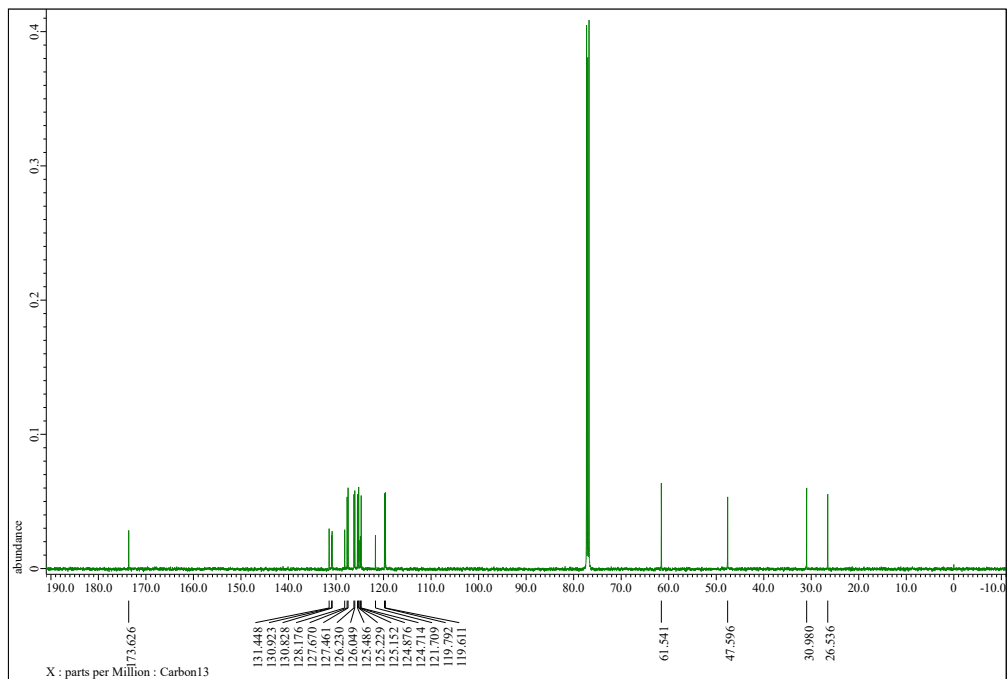

## <sup>D</sup>Pro-1-Naph (8) (Chemical Formula: C<sub>15</sub>H<sub>16</sub>N<sub>2</sub>O)

### <sup>1</sup>H-NMR

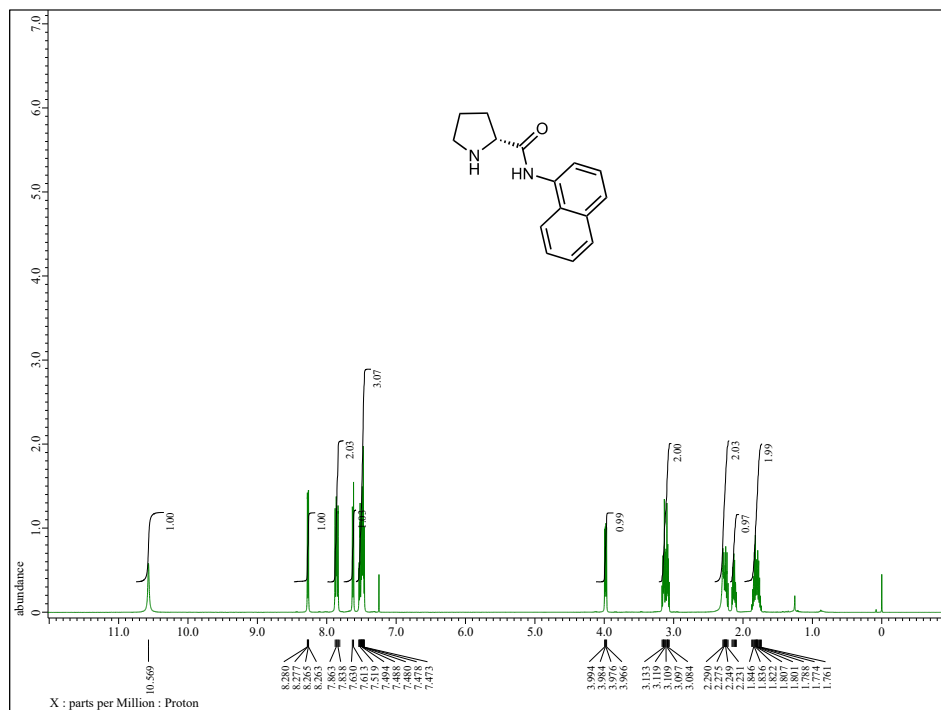

## <sup>13</sup>C-NMR

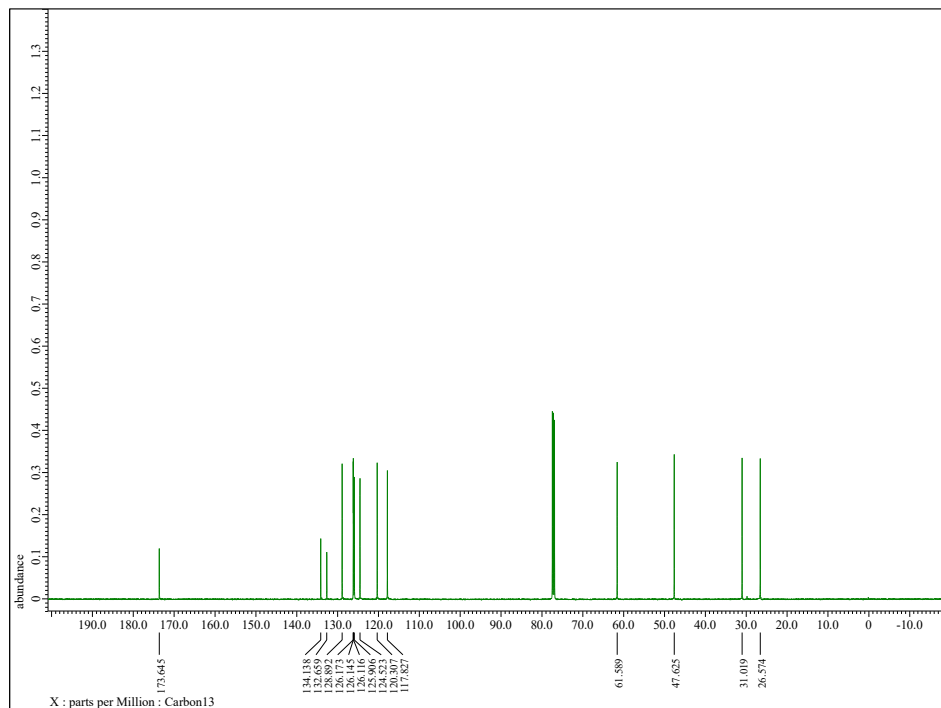

## L-Aze-1-Naph (12a) (Chemical Formula: C<sub>14</sub>H<sub>14</sub>N<sub>2</sub>O)

### <sup>1</sup>H-NMR

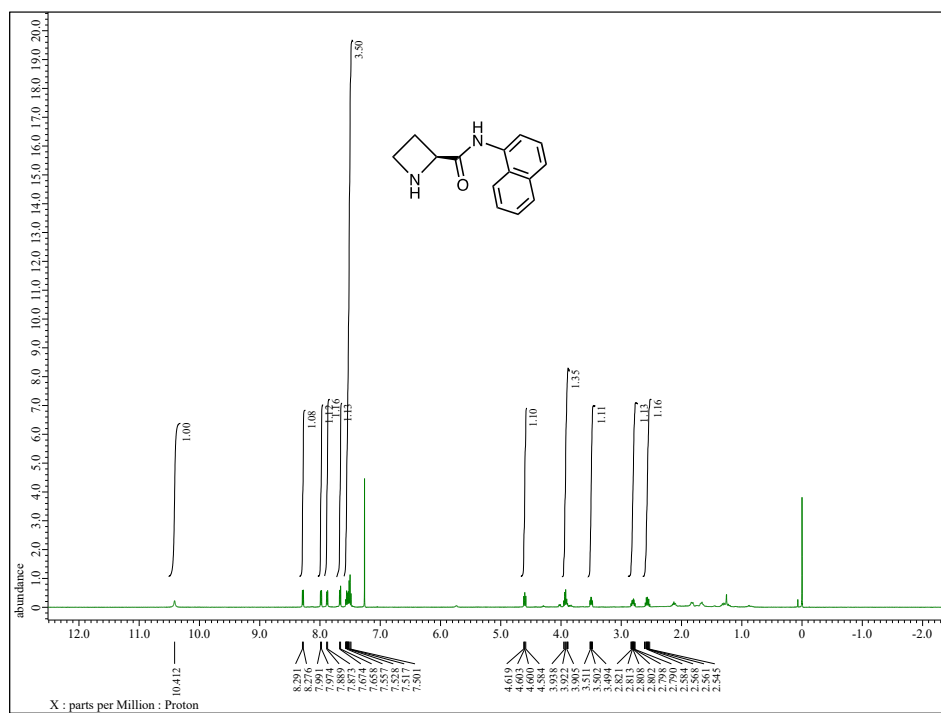



## <sup>13</sup>C-NMR

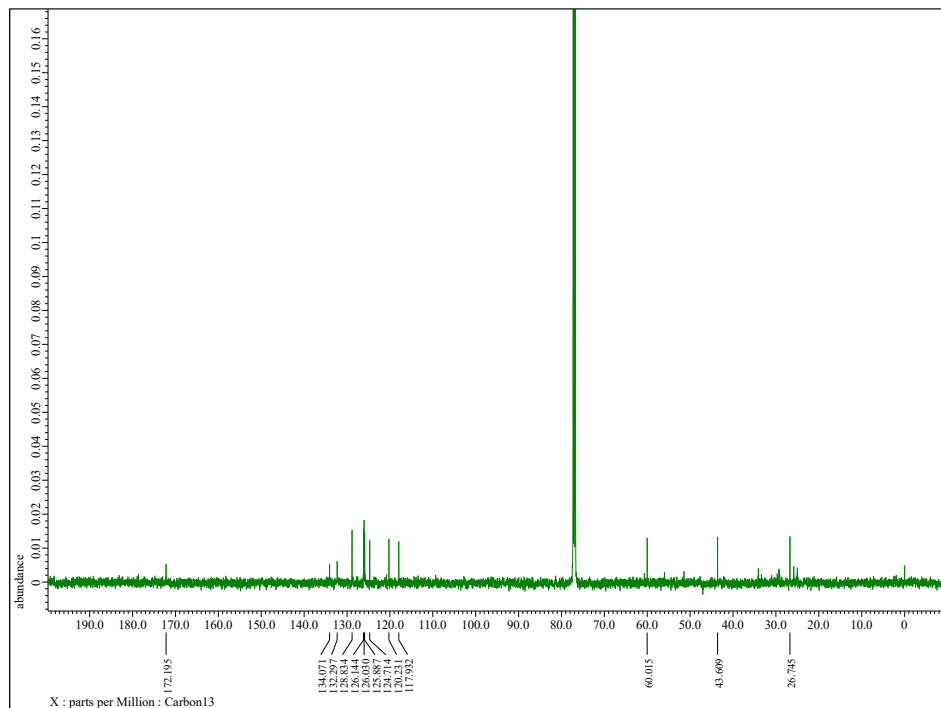

## L-Pip-1-Naph (12b) (Chemical Formula: C<sub>16</sub>H<sub>18</sub>N<sub>2</sub>O)

### <sup>1</sup>H-NMR

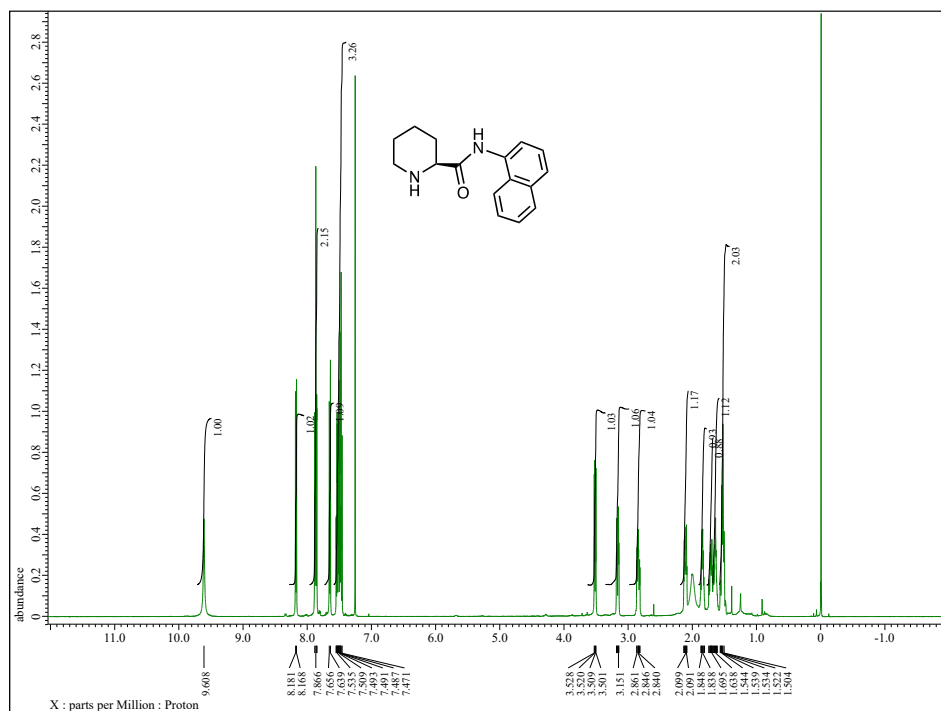

### <sup>13</sup>C-NMR

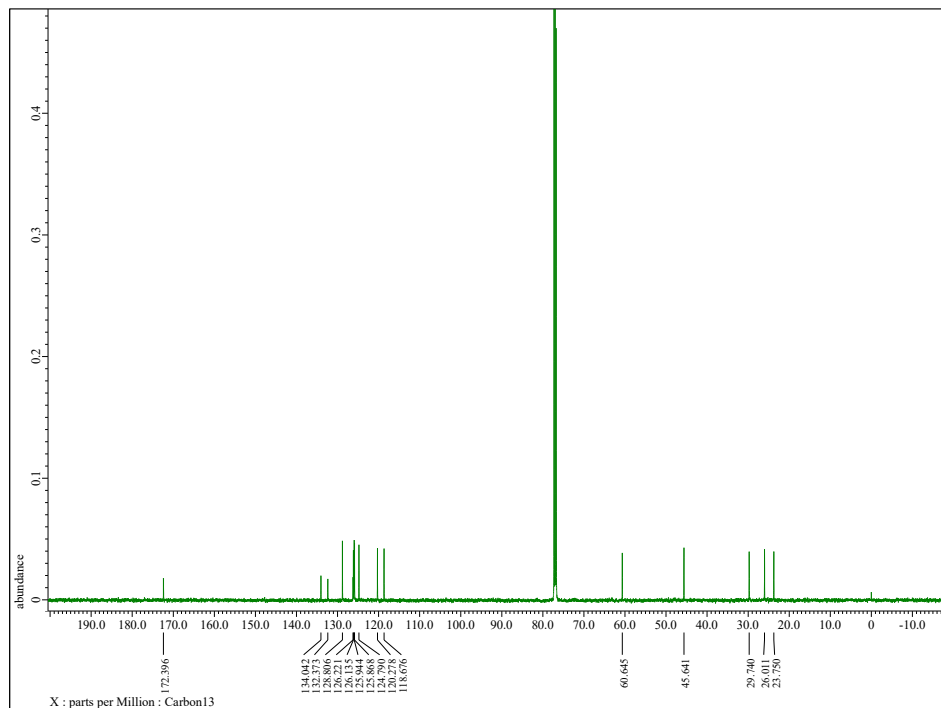

### L-Ala- L-Pro-1-Naph (5a) (Chemical Formula: C<sub>18</sub>H<sub>18</sub>N<sub>3</sub>O<sub>2</sub>)

### <sup>1</sup>H-NMR

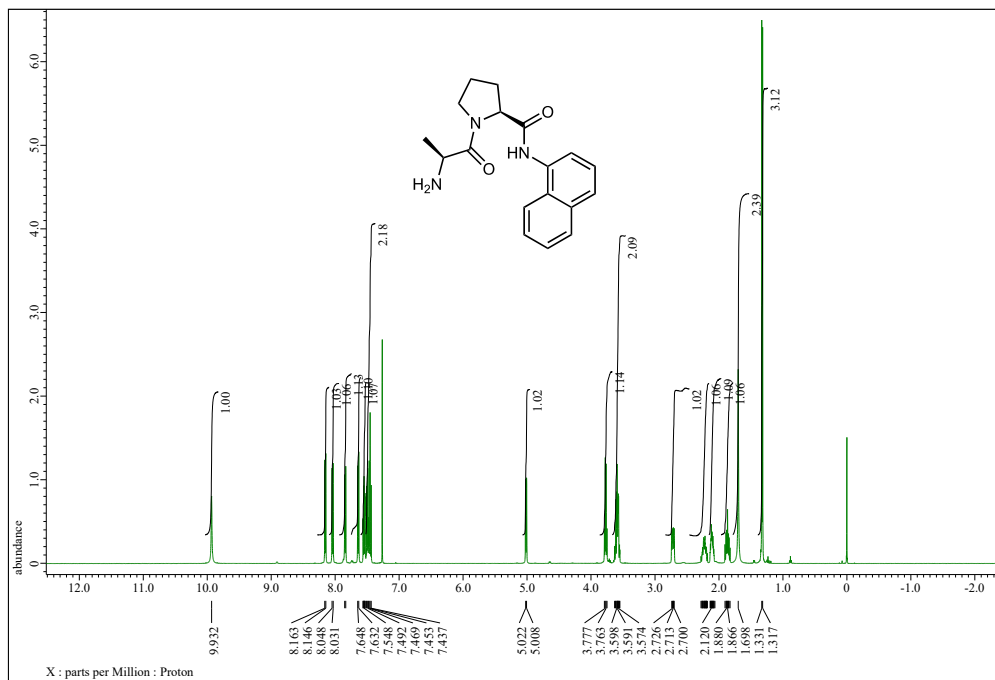

### <sup>13</sup>C-NMR

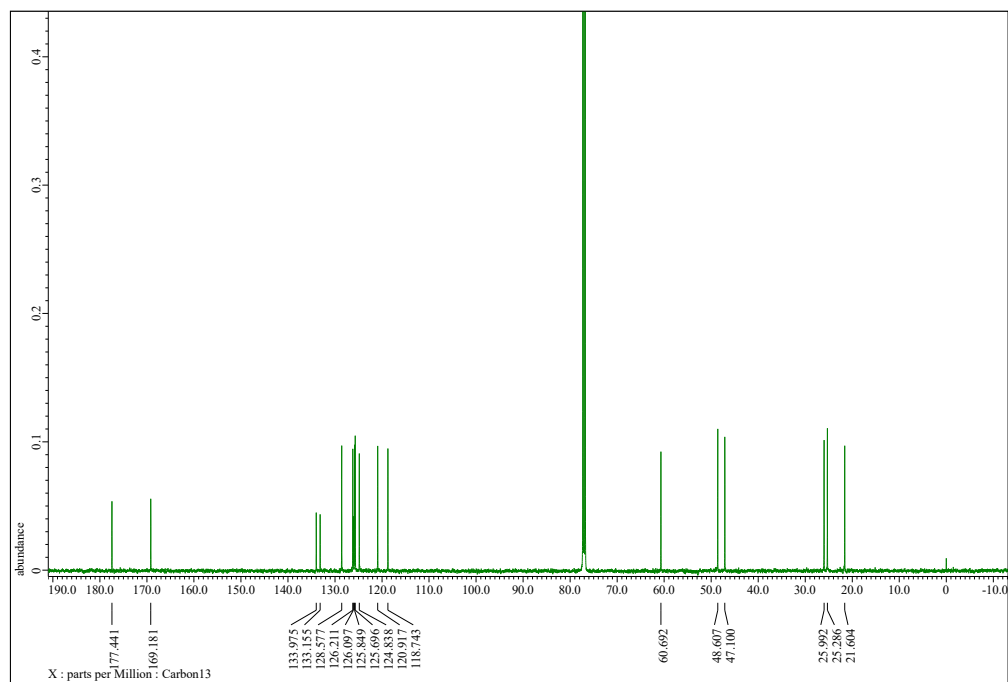

**L-Val- L-Pro-1-Naph (5b)** (Chemical Formula:  $C_{20}H_{25}N_3O_2$ )

**$^1H$ -NMR**

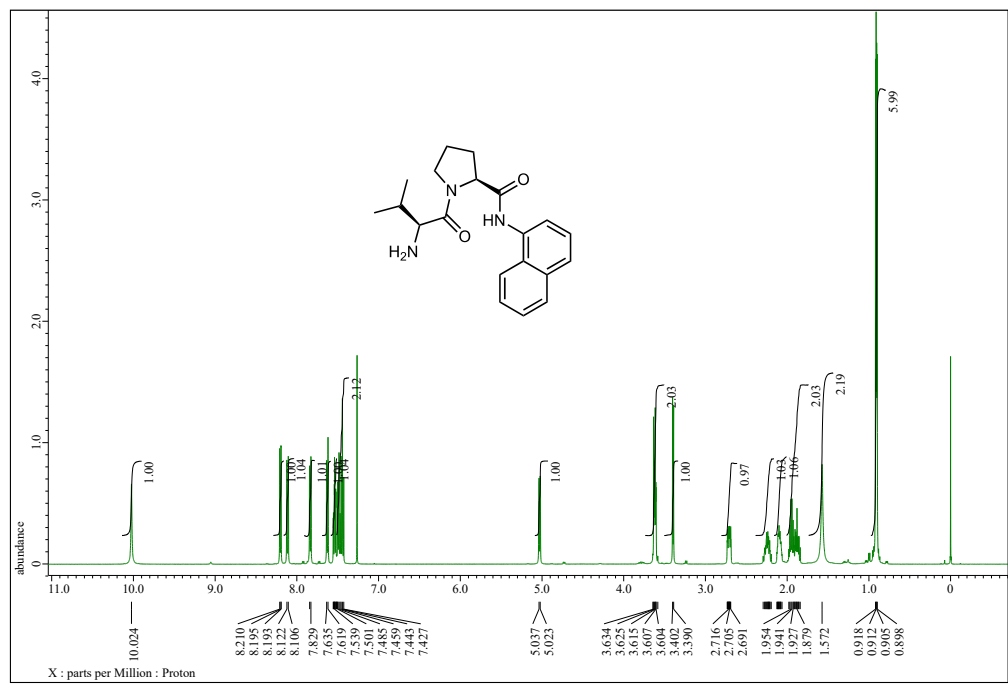

## <sup>13</sup>C-NMR

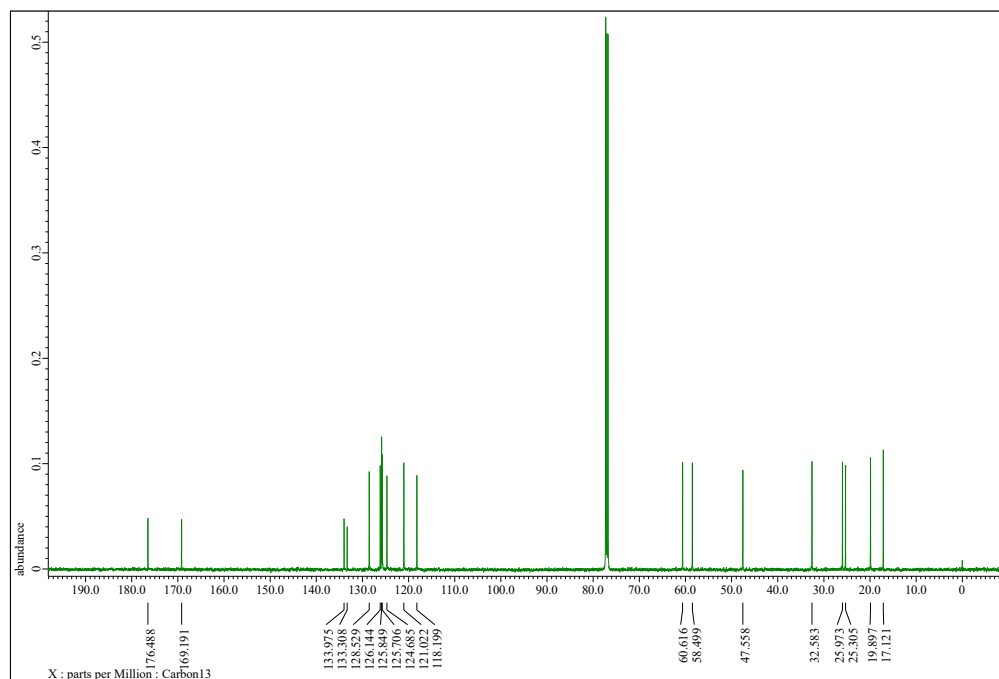

## L-Tle- L-Pro-1-Naph (5c) (Chemical Formula: C<sub>21</sub>H<sub>27</sub>N<sub>3</sub>O<sub>2</sub>)

## <sup>1</sup>H-NMR

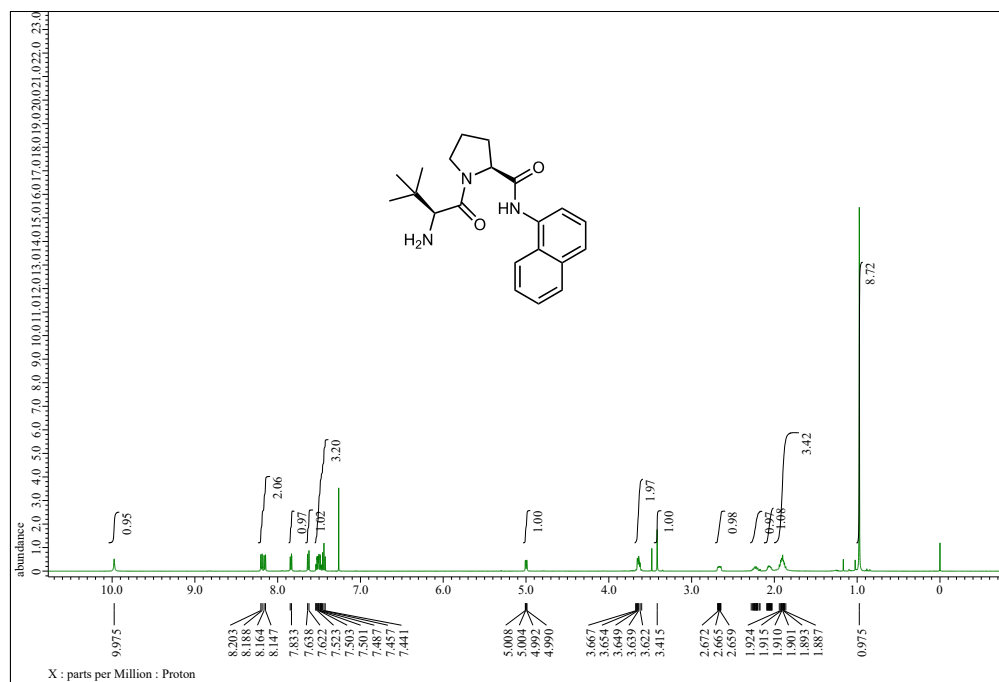

### **13C-NMR**

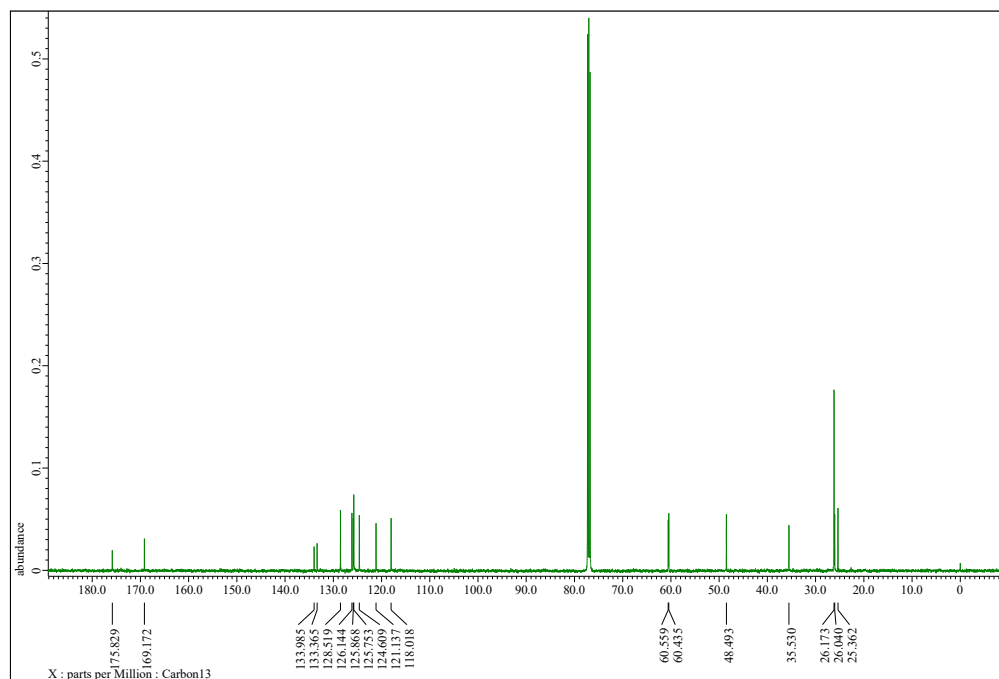

### **L-Phg- L-Pro-1-Naph (5d) (Chemical Formula: C<sub>23</sub>H<sub>23</sub>N<sub>3</sub>O<sub>2</sub>)**

### **1H-NMR**

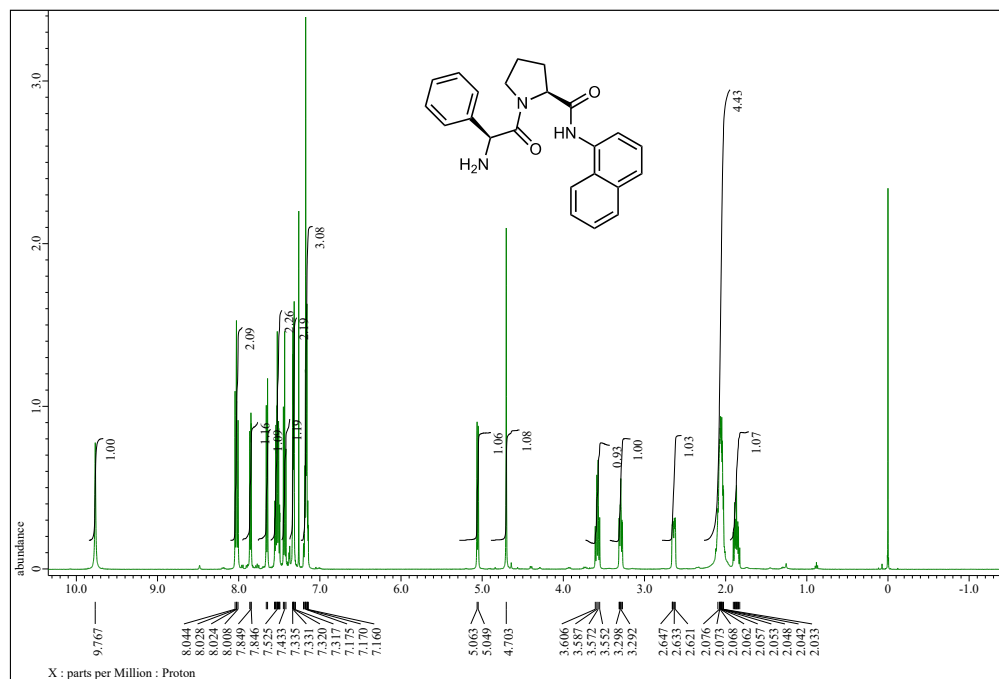

### **13C-NMR**

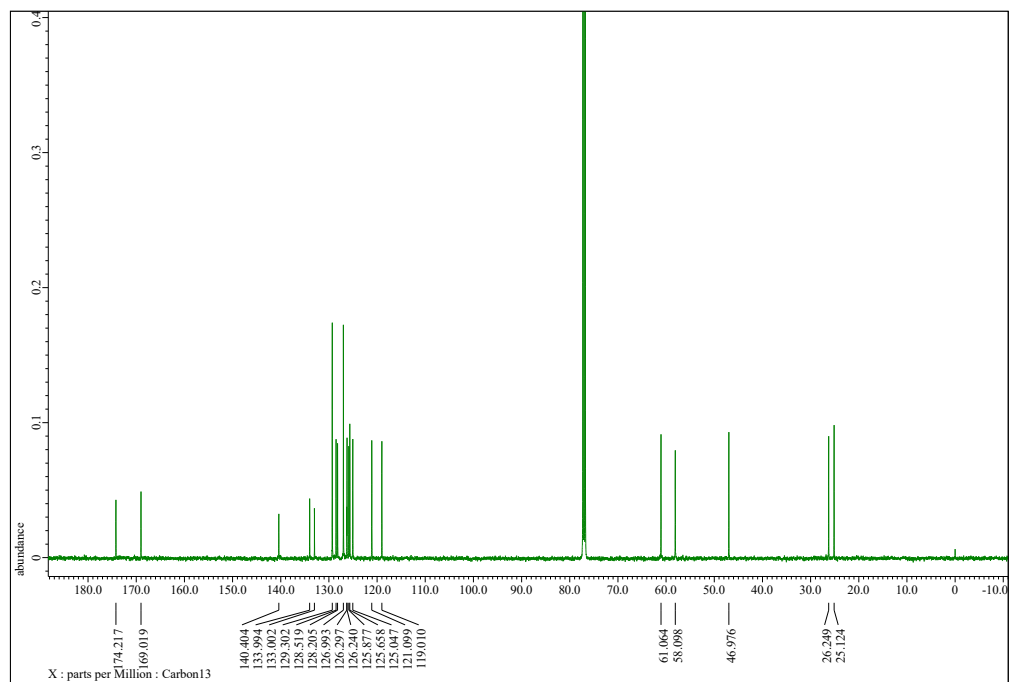

**L-Phe- L-Pro-1-Naph (5e) (Chemical Formula: C<sub>24</sub>H<sub>25</sub>N<sub>3</sub>O<sub>2</sub>)**

**<sup>1</sup>H-NMR**

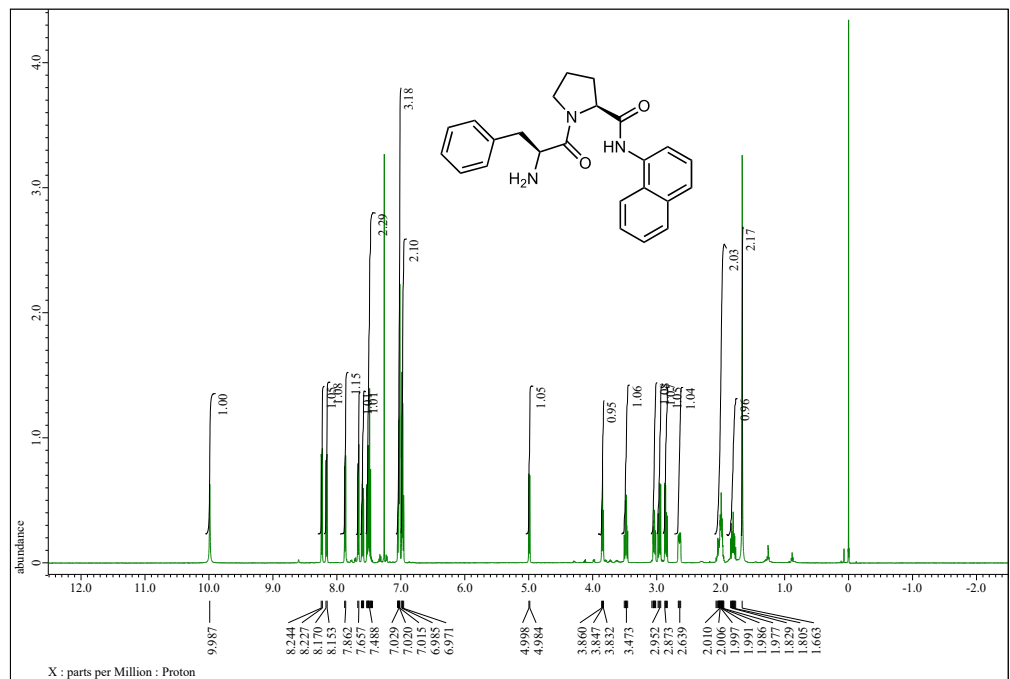

**<sup>13</sup>C-NMR**

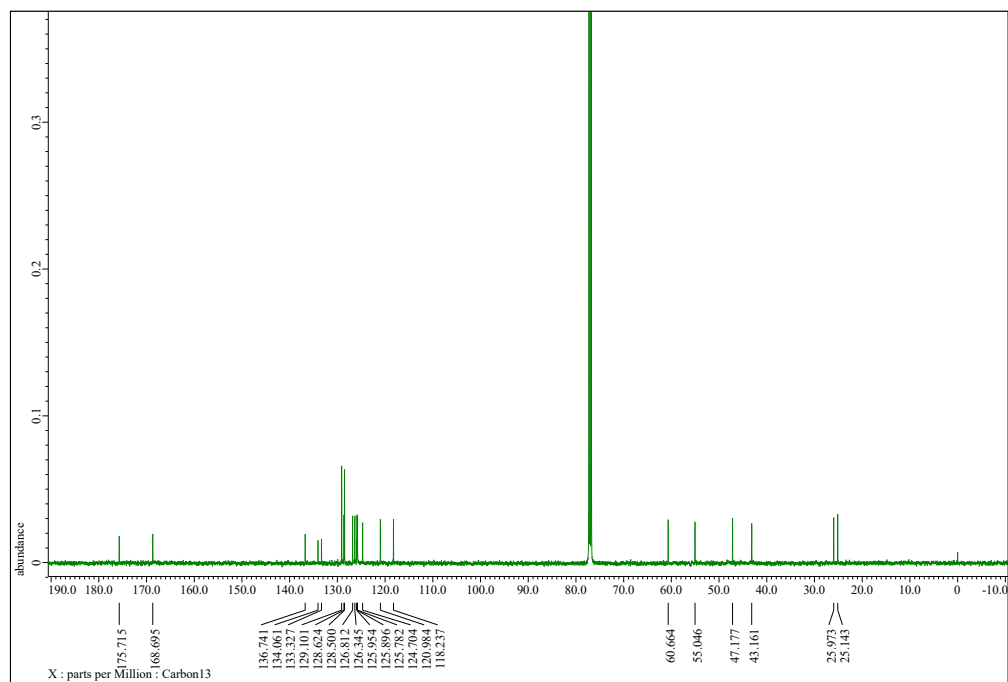

**L-Tle- L-Pro-1-Ph (5f)** (Chemical Formula:  $C_{17}H_{25}N_3O_2$ )

**<sup>1</sup>H-NMR**

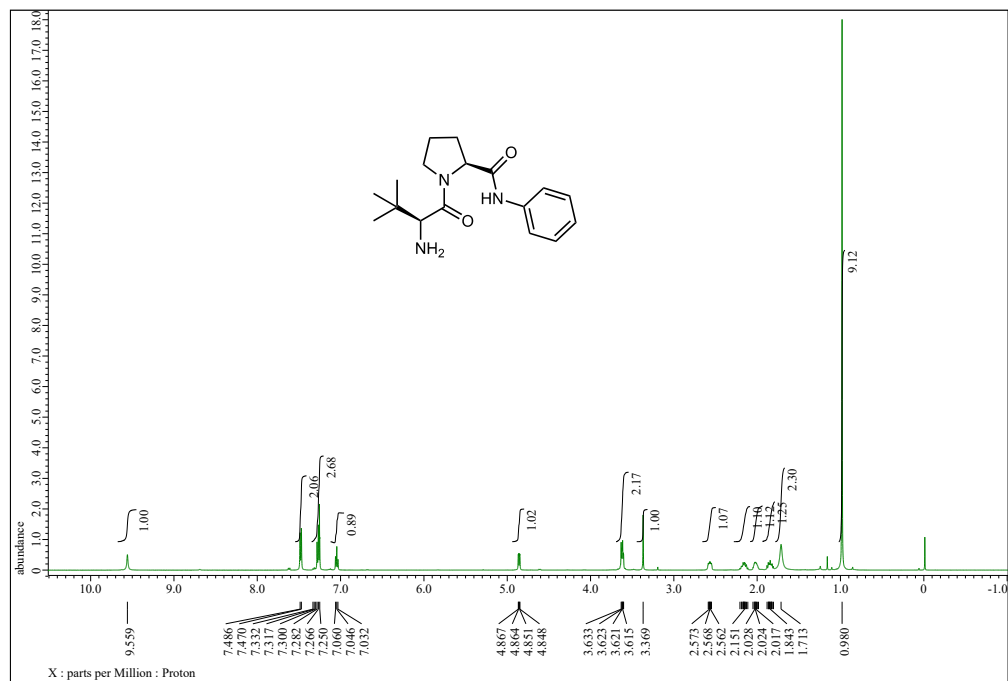

### <sup>13</sup>C-NMR

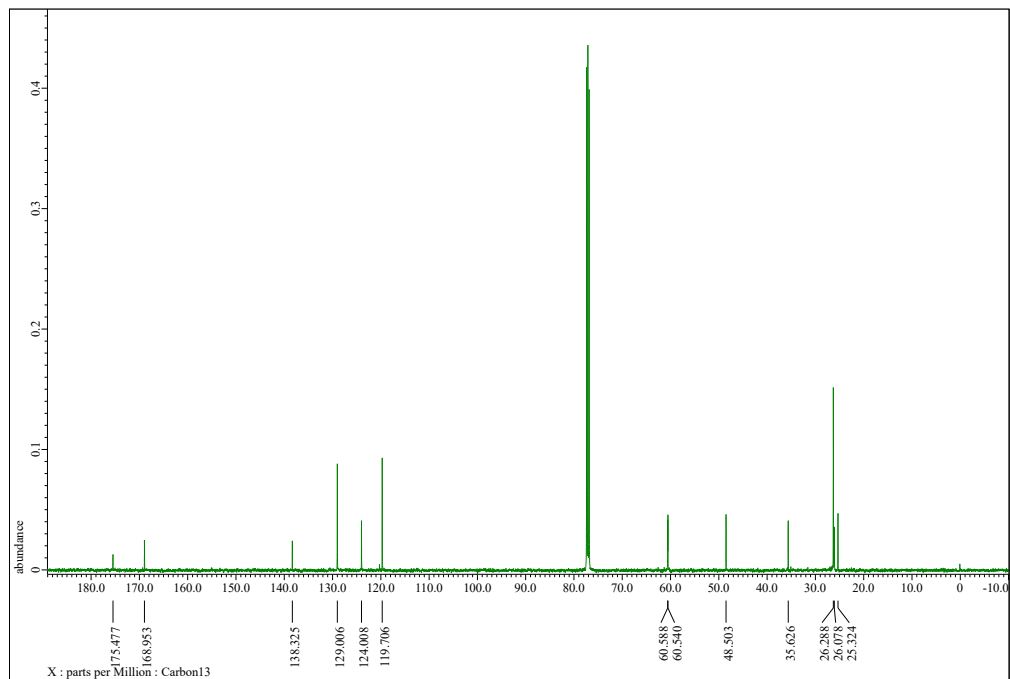

### L-Tle- L-Pro-1-Anth (5g) (Chemical Formula: C<sub>25</sub>H<sub>29</sub>N<sub>3</sub>O<sub>2</sub>)

### <sup>1</sup>H-NMR

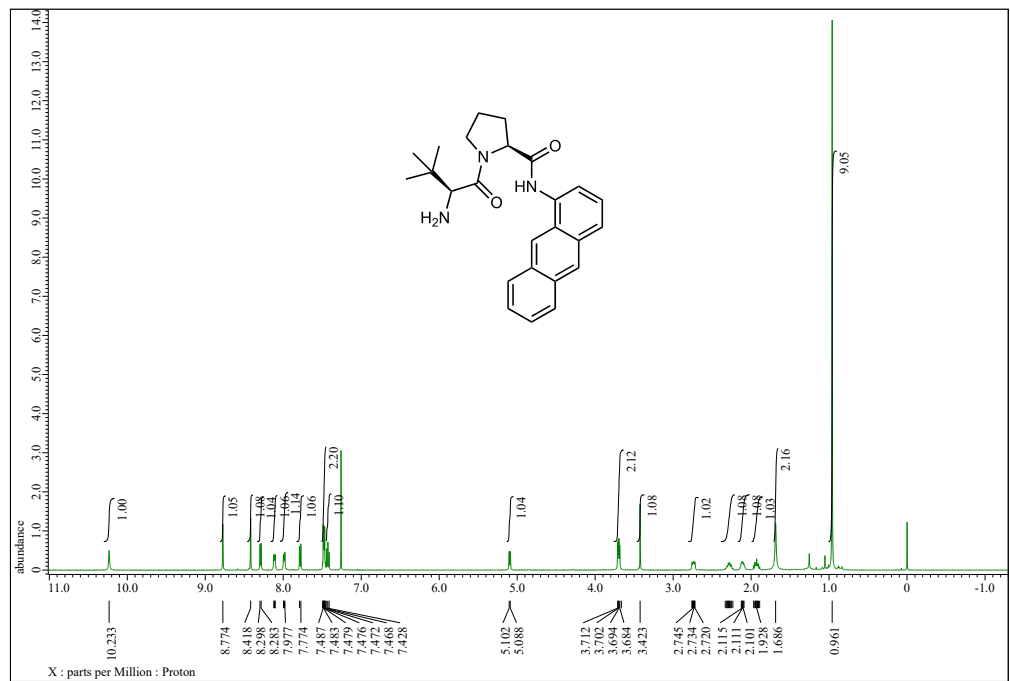



## <sup>13</sup>C-NMR

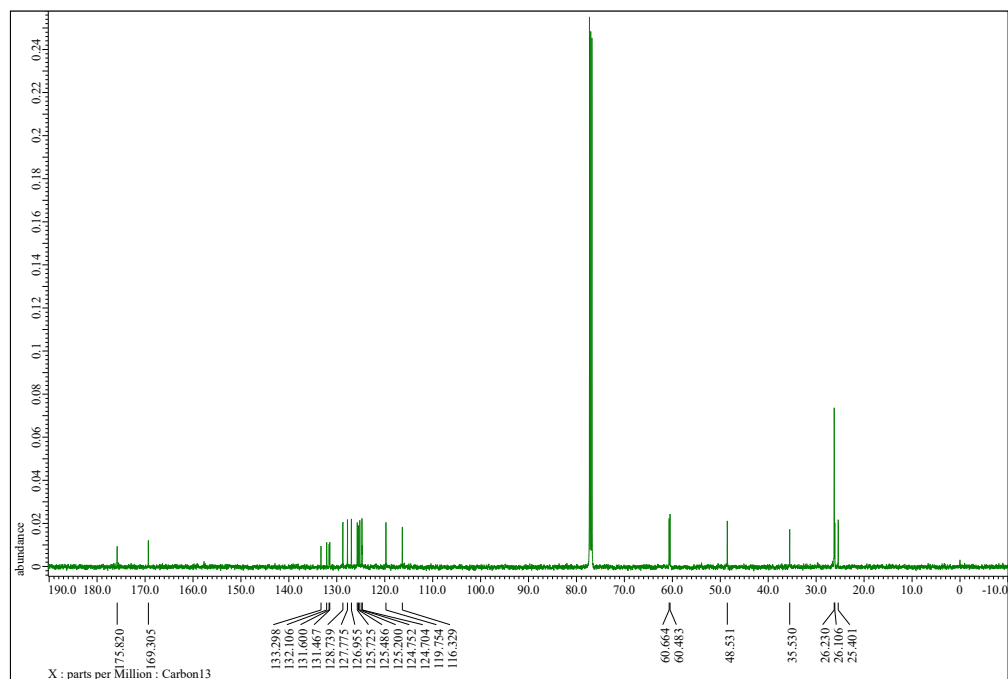

## L-Tle- L-Pro-1-Pyr (5h) (Chemical Formula: C<sub>27</sub>H<sub>29</sub>N<sub>3</sub>O<sub>2</sub>)

### <sup>1</sup>H-NMR

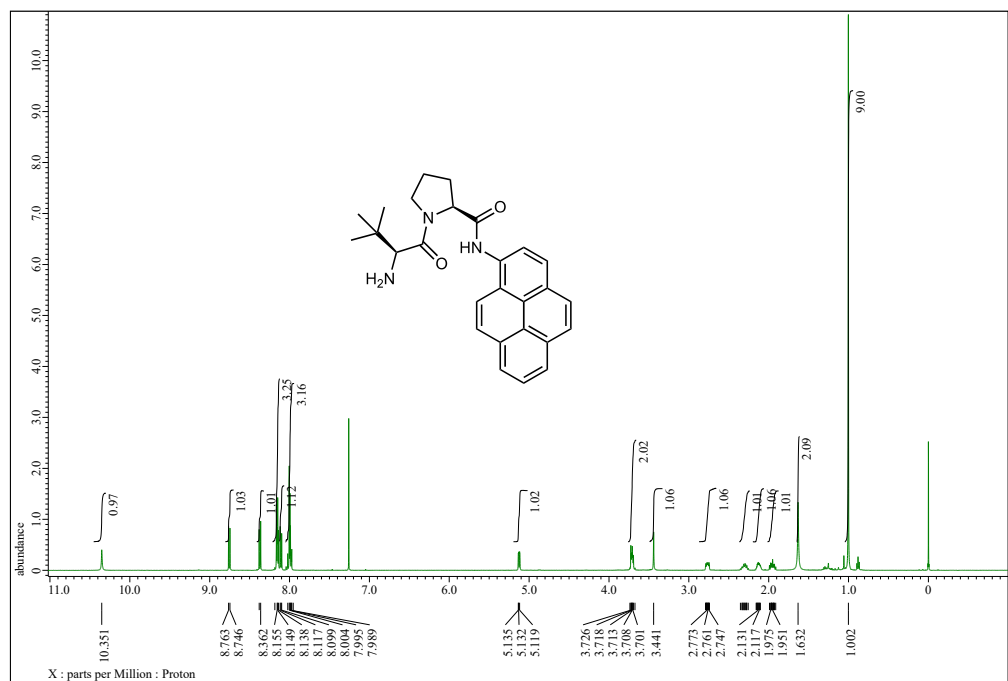

## <sup>13</sup>C-NMR

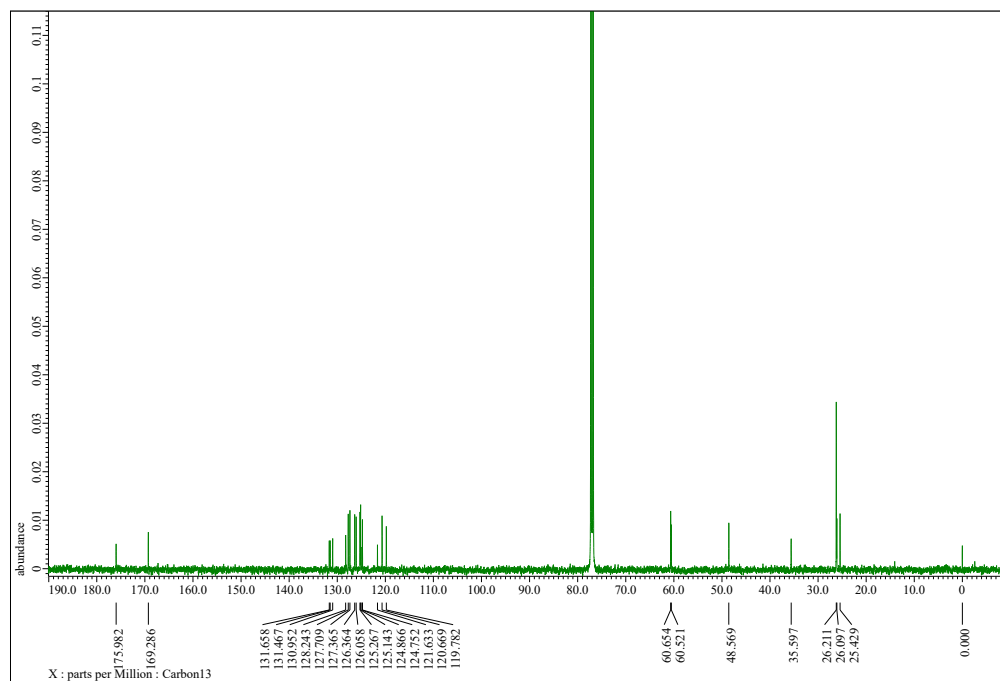

L-Tle-D-Pro-1-Naph (9) (Chemical Formula: C<sub>21</sub>H<sub>27</sub>N<sub>3</sub>O<sub>2</sub>)

## <sup>1</sup>H-NMR

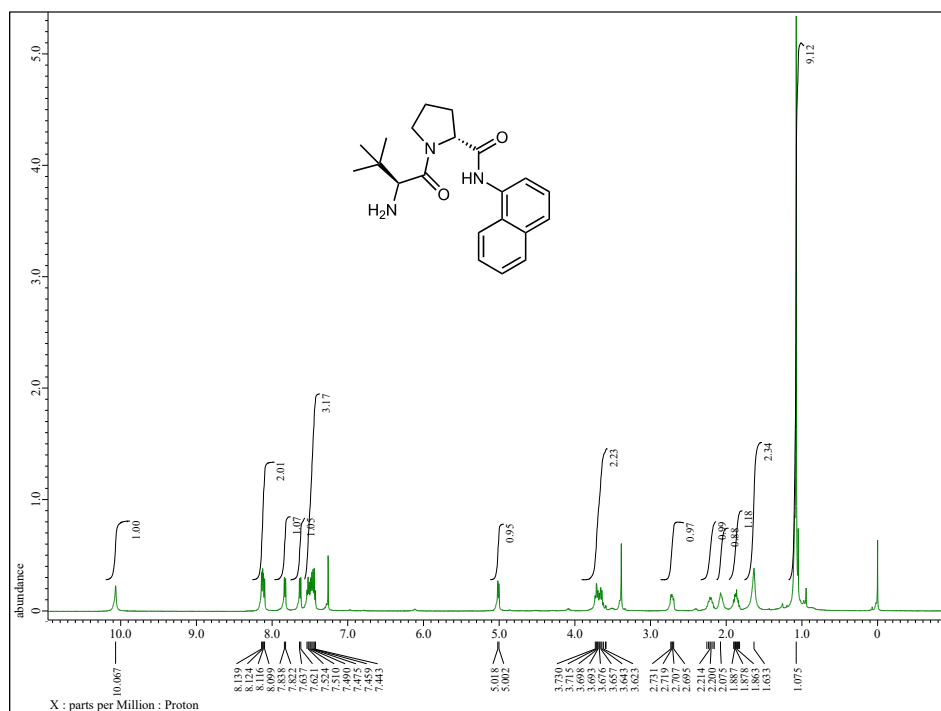

### 13C-NMR

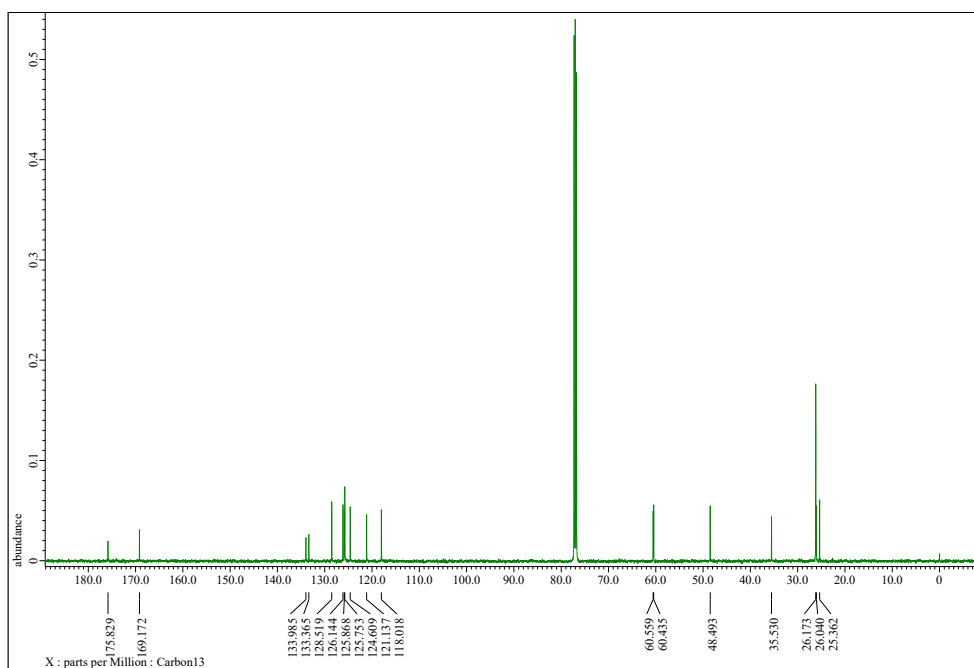

### L-Tle- L-Aze-1-Naph (13a) (Chemical Formula: C<sub>20</sub>H<sub>25</sub>N<sub>3</sub>O<sub>2</sub>)

#### <sup>1</sup>H-NMR

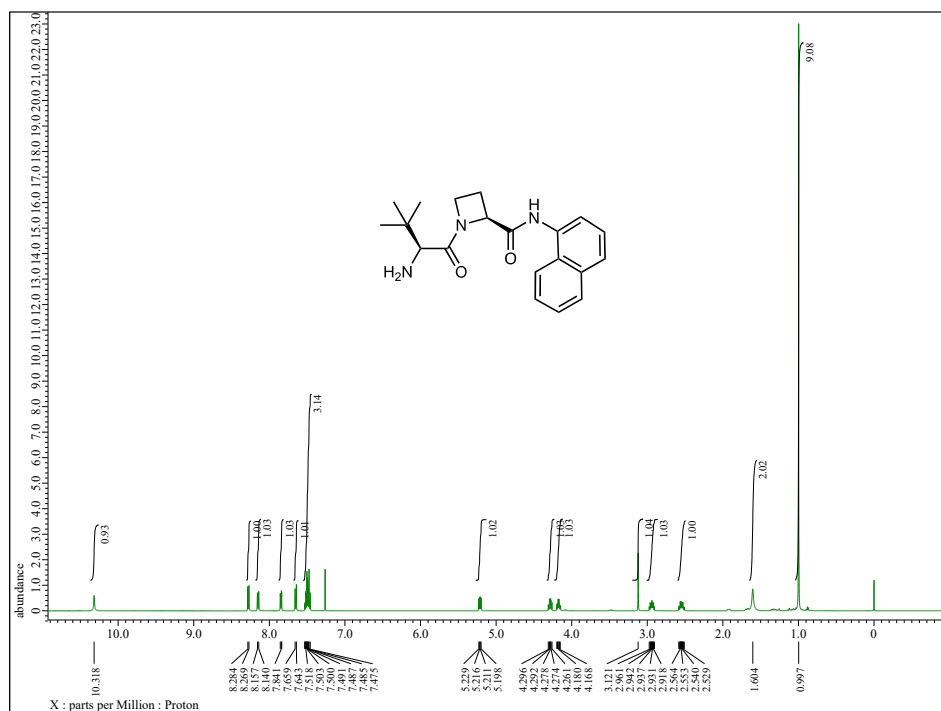

### <sup>13</sup>C-NMR

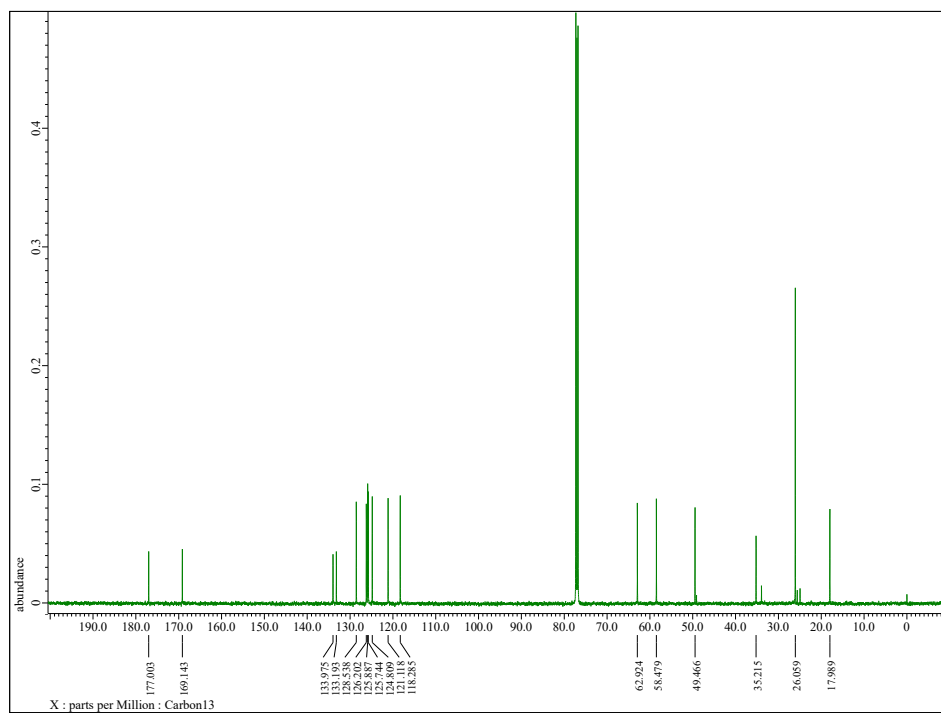

### L-Tle- L-Pip-1-Naph (13b) (Chemical Formula: C<sub>22</sub>H<sub>29</sub>N<sub>3</sub>O<sub>2</sub>)

#### <sup>1</sup>H-NMR

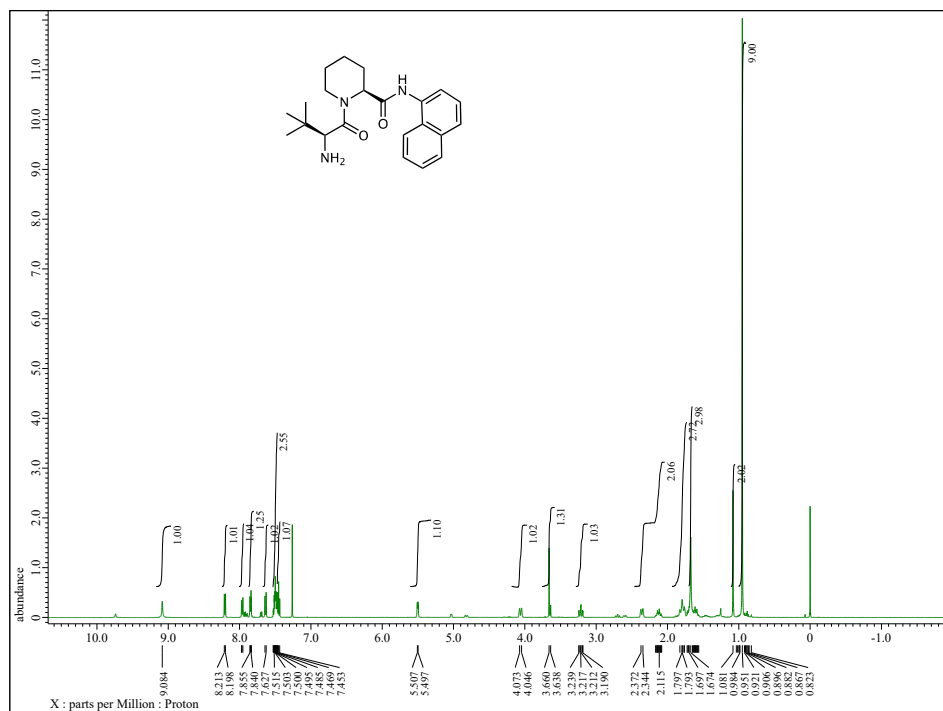

### 13C-NMR

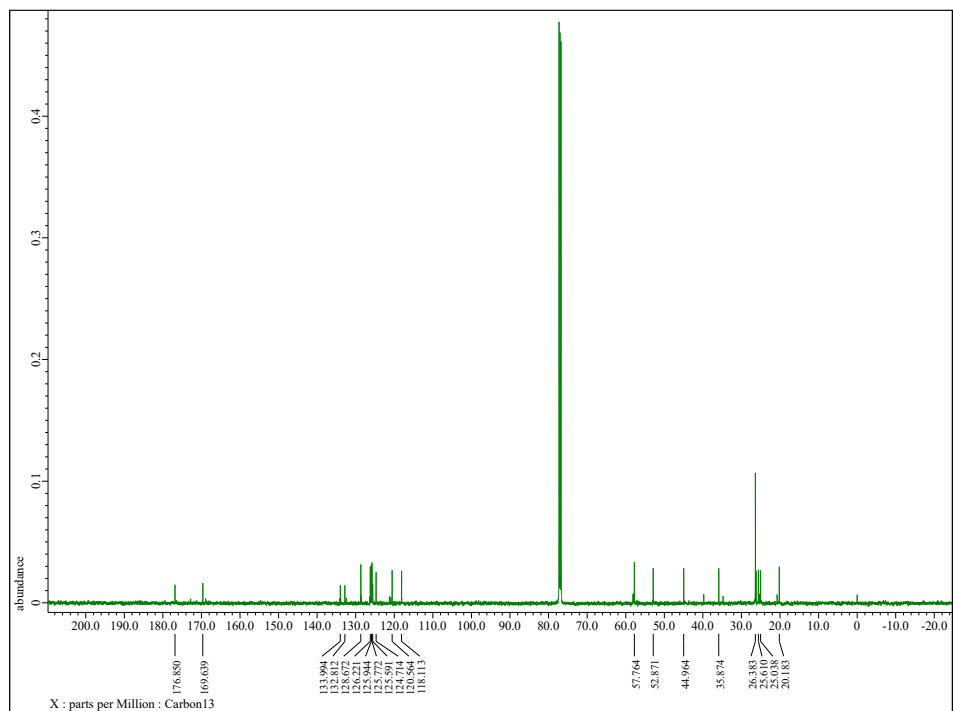

L-Ala- L-Tle- L-Pro-1-Naph (6a) (Chemical Formula: C<sub>24</sub>H<sub>32</sub>N<sub>4</sub>O<sub>3</sub>)

### <sup>1</sup>H-NMR

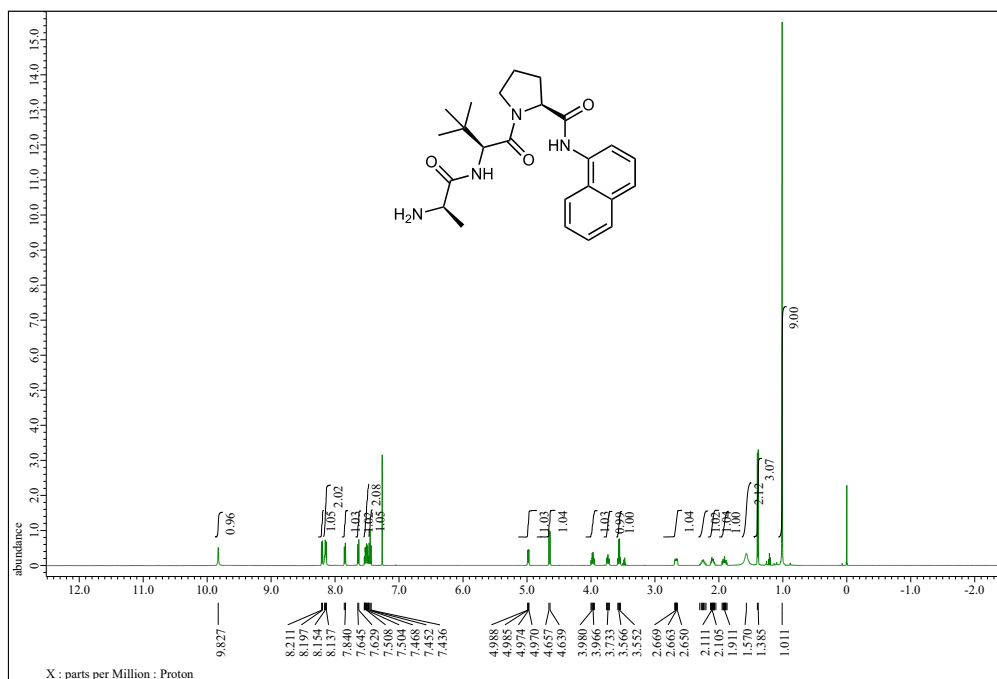

### <sup>13</sup>C-NMR

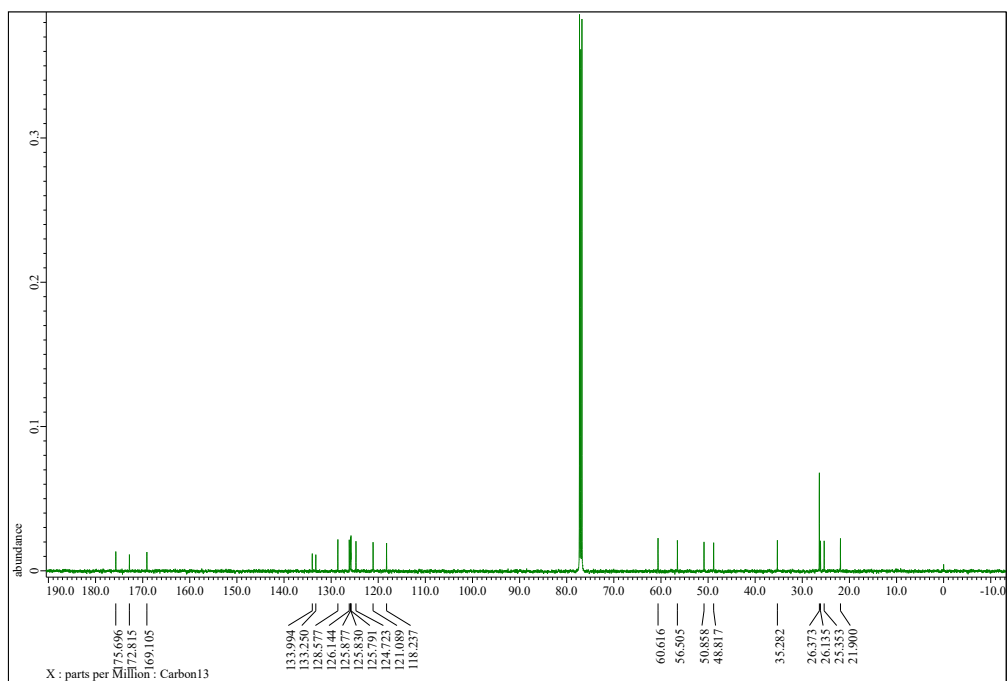

L-Val- L-Tle- L-Pro-1-Naph (6b) (Chemical Formula: C<sub>26</sub>H<sub>36</sub>N<sub>4</sub>O<sub>3</sub>)

# <sup>1</sup>H-NMR

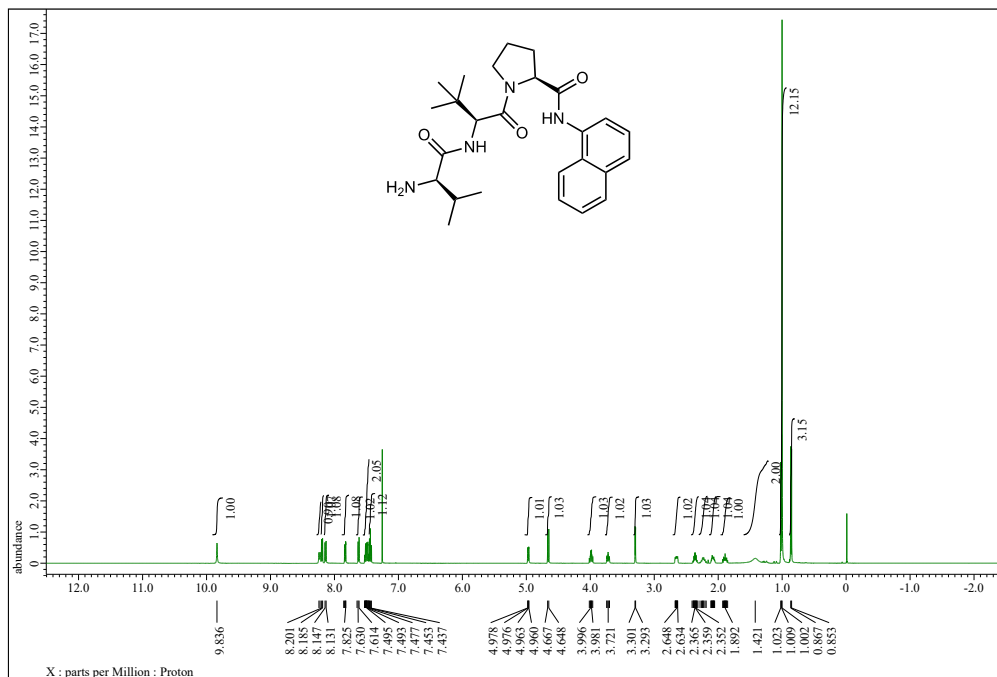

# <sup>13</sup>C-NMR

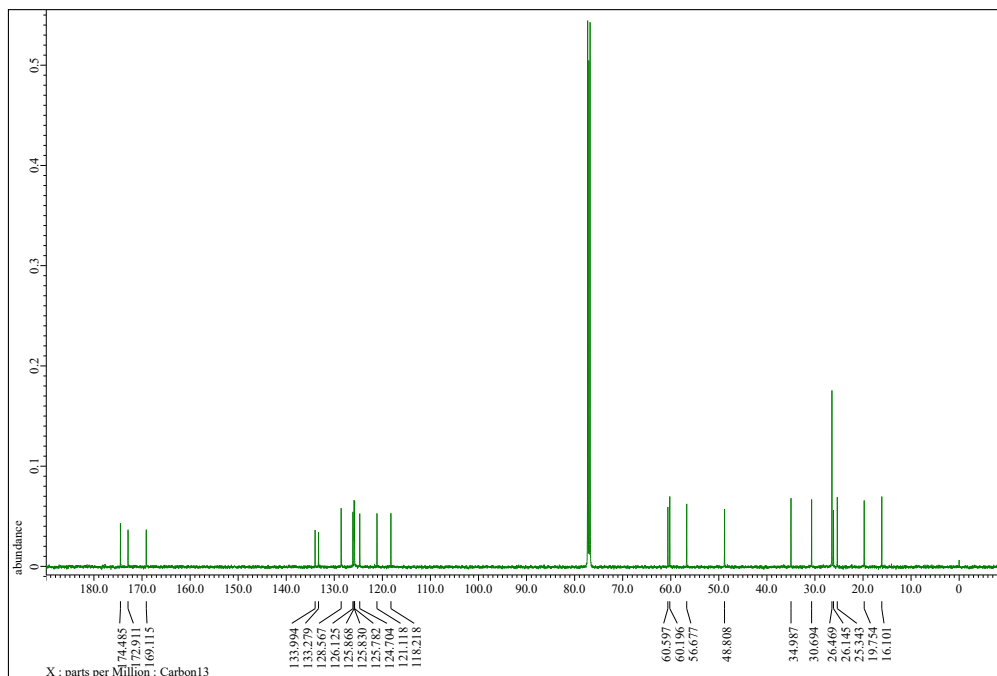

L-Tel- L-Tle- L-Pro-1-Naph (6c) (Chemical Formula: C<sub>27</sub>H<sub>38</sub>N<sub>4</sub>O<sub>3</sub>)

# <sup>1</sup>H-NMR

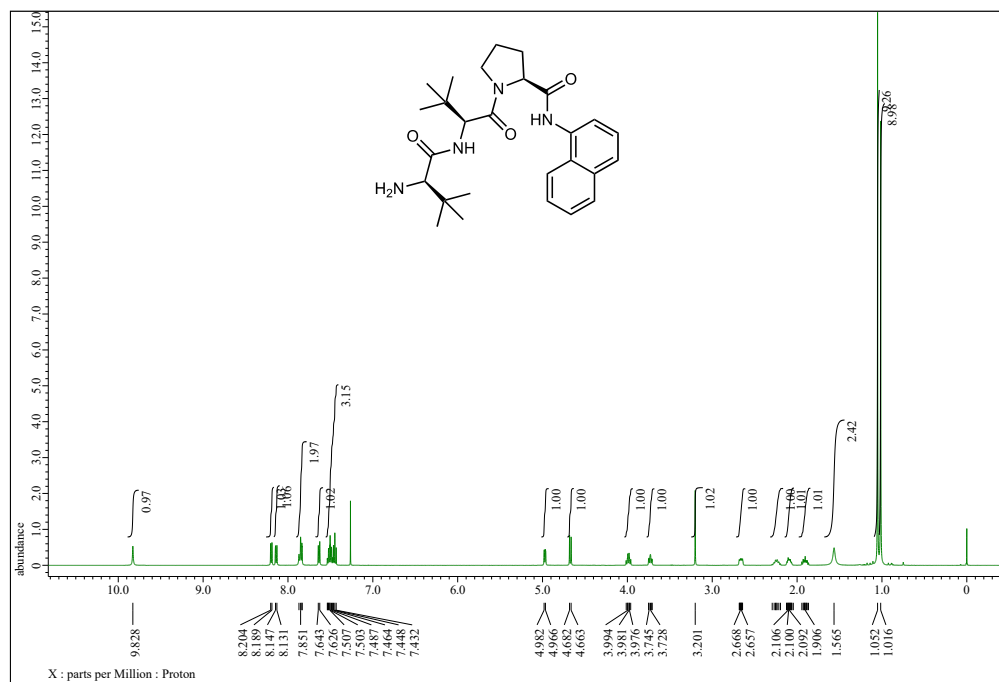

### <sup>13</sup>C-NMR

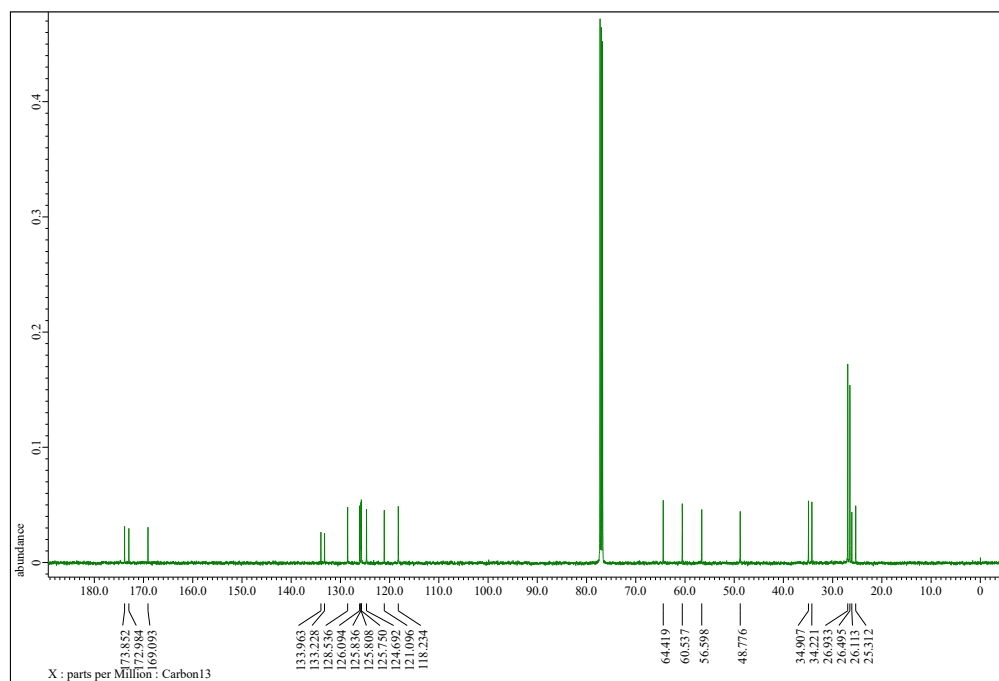

L-Phg-L-Tle-L-Pro-1-Naph (6d) (Chemical Formula: C<sub>29</sub>H<sub>34</sub>N<sub>4</sub>O<sub>3</sub>)

<sup>1</sup>H-NMR



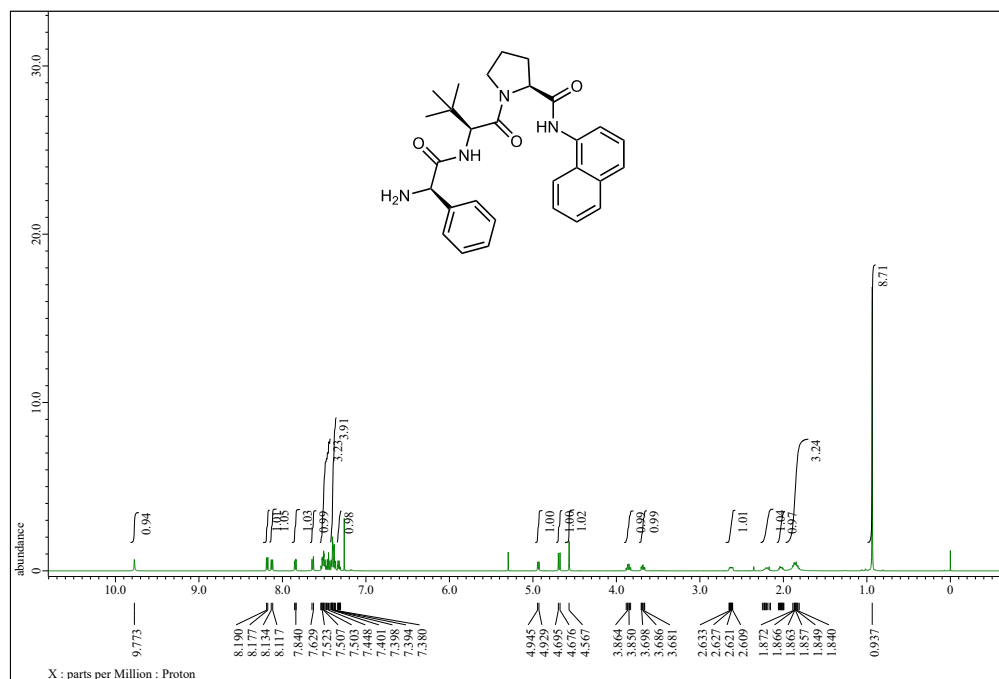

### <sup>13</sup>C-NMR

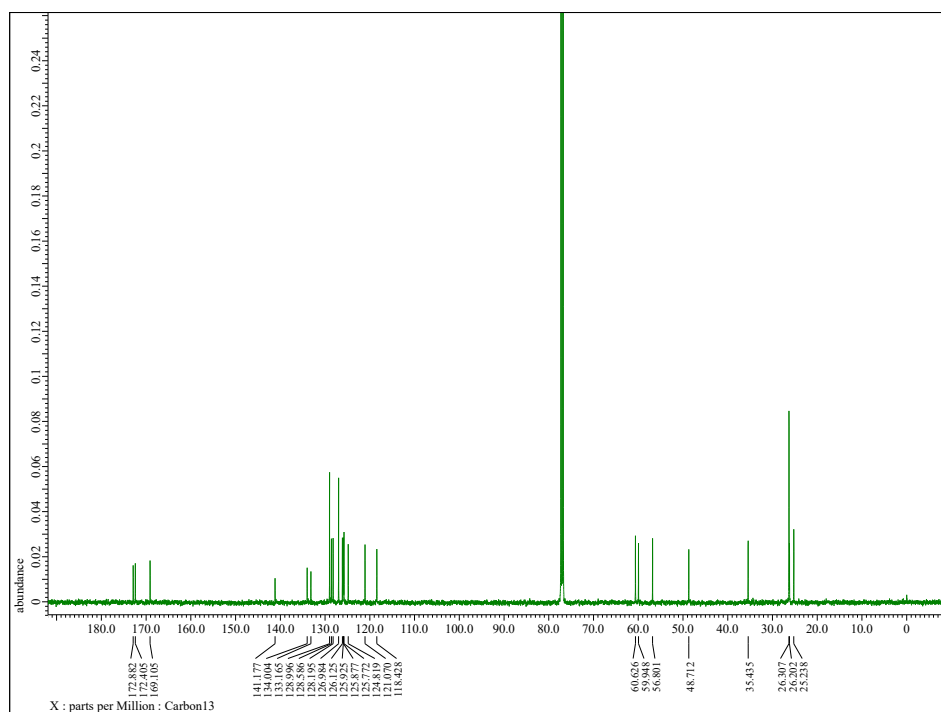

L-Phe- L-Tle- L-Pro-1-Naph (6e) (Chemical Formula: C<sub>30</sub>H<sub>36</sub>N<sub>4</sub>O<sub>3</sub>)

<sup>1</sup>H-NMR

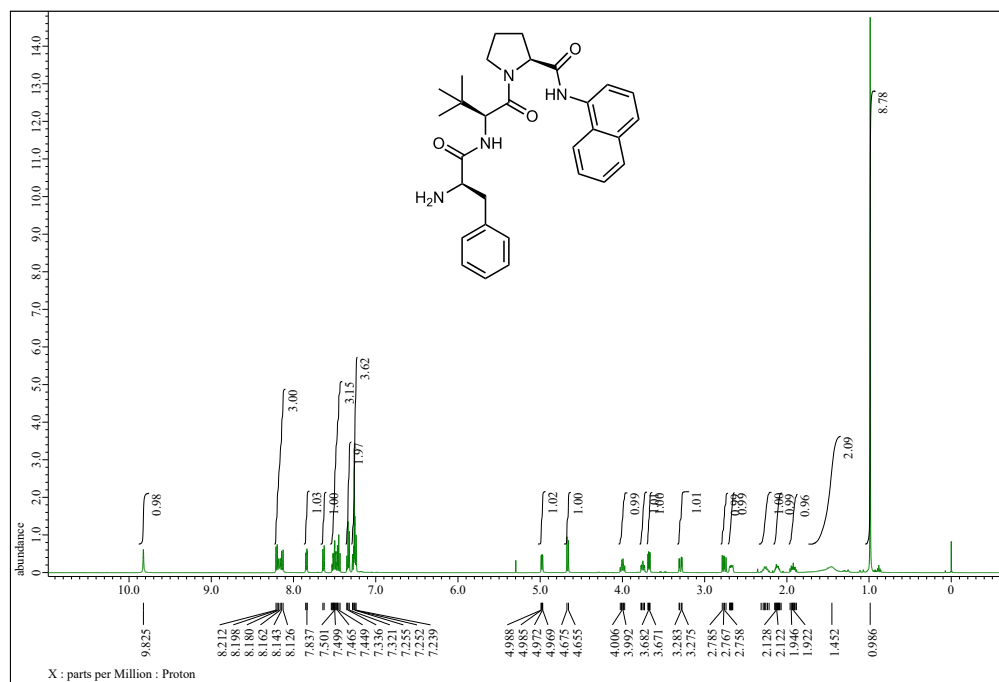

### <sup>13</sup>C-NMR

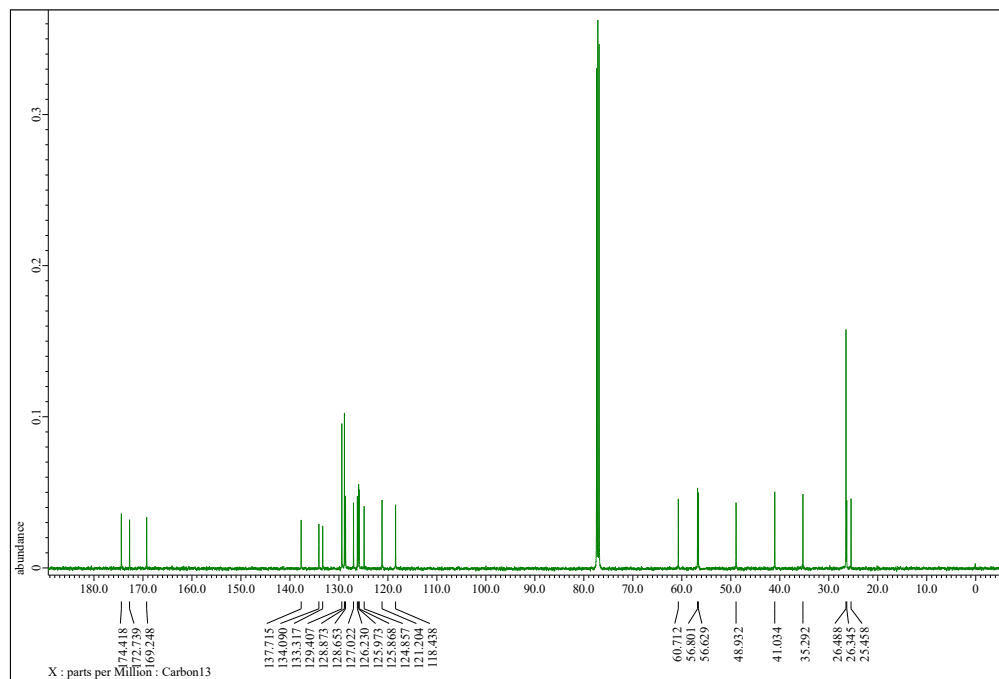

Gly- L-Tle- L-Pro-1-Naph (6f) (Chemical Formula: C<sub>23</sub>H<sub>30</sub>N<sub>4</sub>O<sub>3</sub>)

# <sup>1</sup>H-NMR

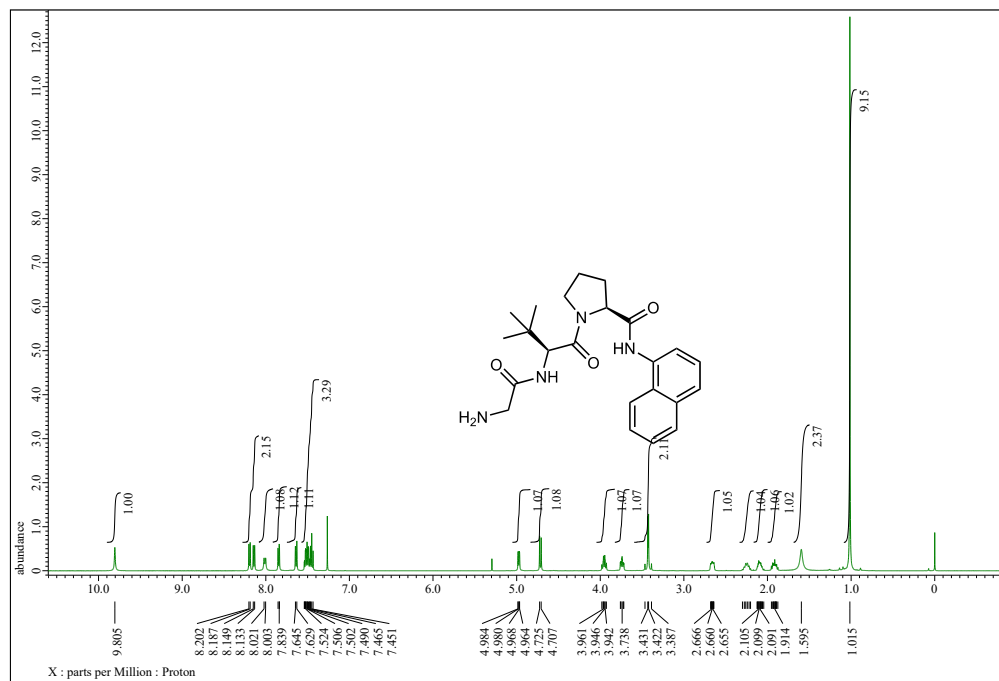

# <sup>13</sup>C-NMR

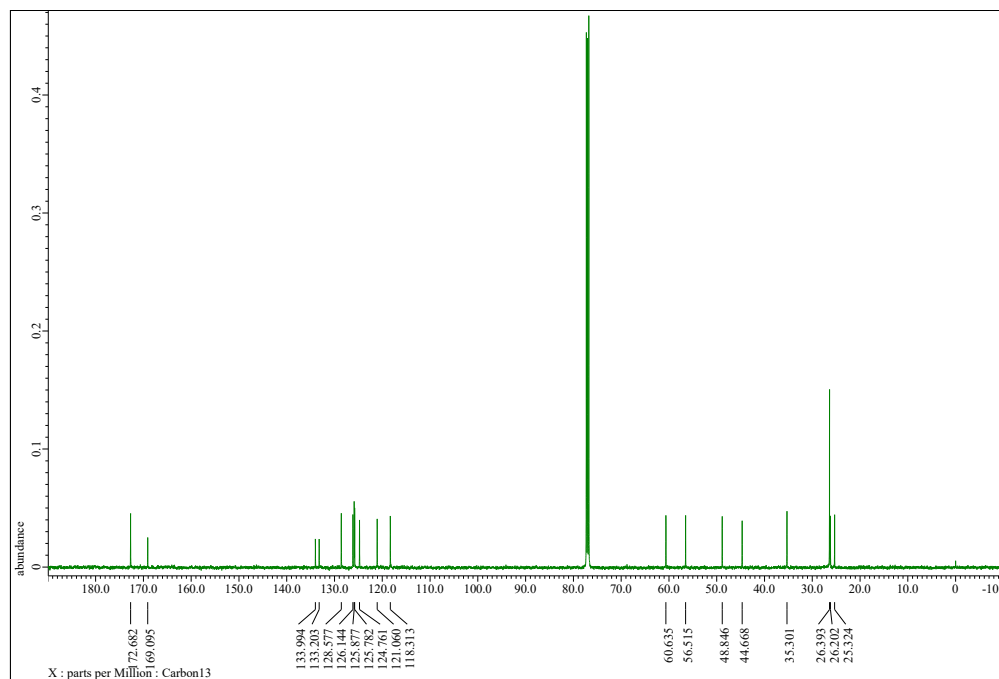

L-Tle- L-Tle- L-Pro-Ph (6g) (Chemical Formula: C<sub>23</sub>H<sub>36</sub>N<sub>4</sub>O<sub>3</sub>)

# <sup>1</sup>H-NMR

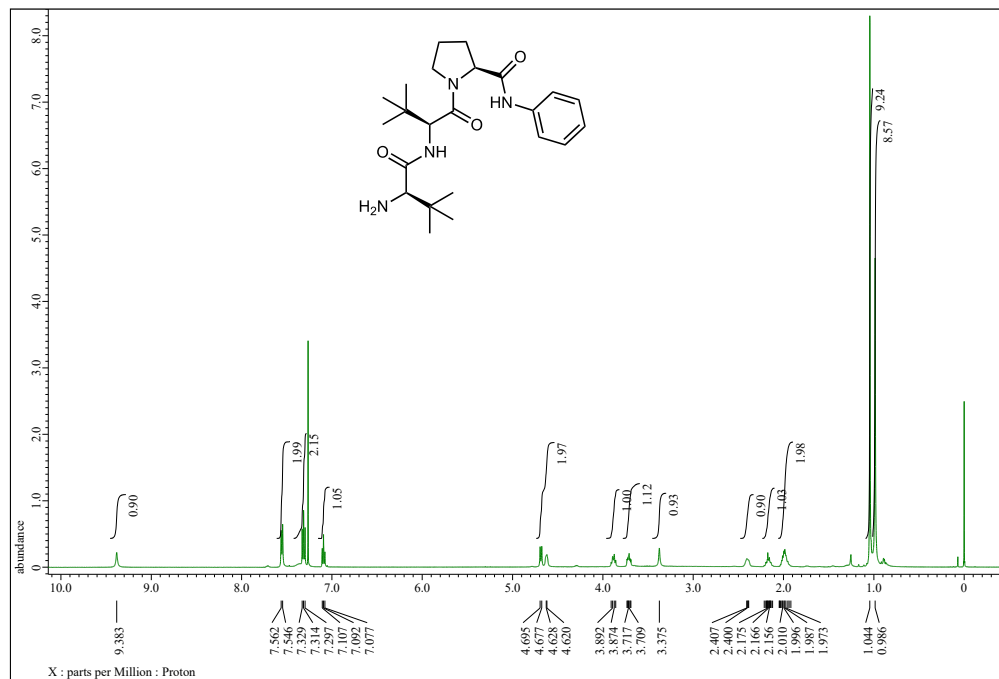

# <sup>13</sup>C-NMR

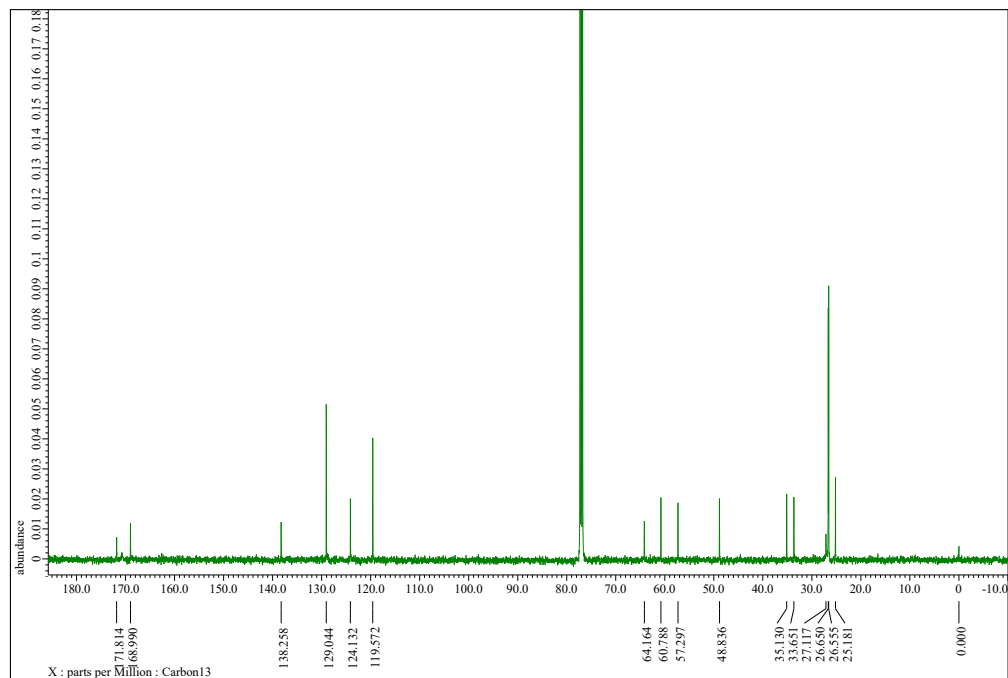

L-Tle- L-Tle- L-Pro-1-Anth (6h) (Chemical Formula: C<sub>31</sub>H<sub>40</sub>N<sub>4</sub>O<sub>3</sub>)

# <sup>1</sup>H-NMR

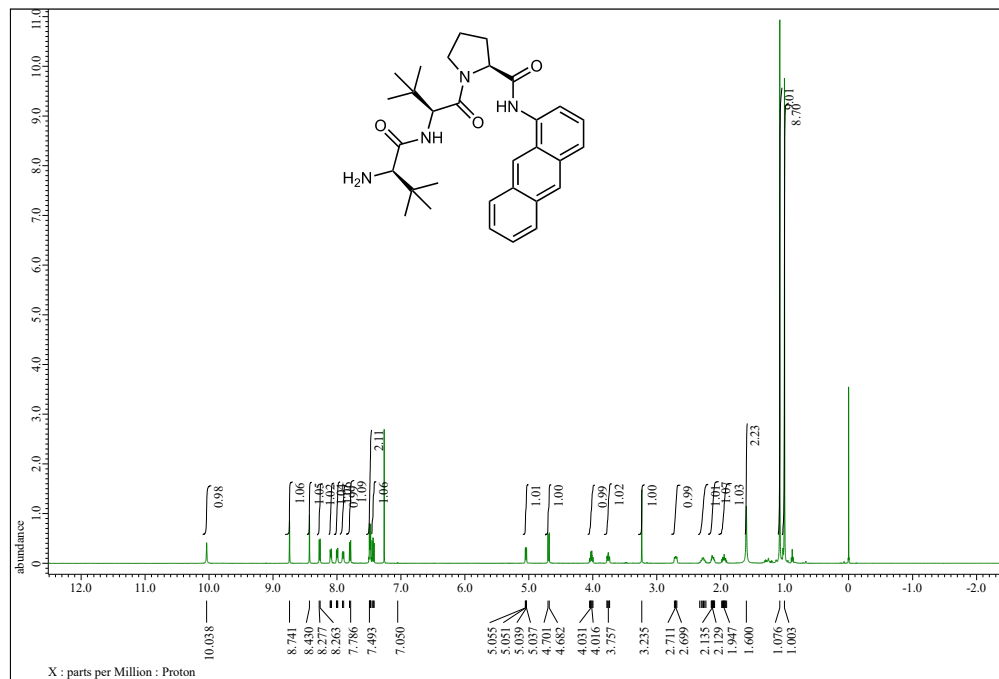

# <sup>13</sup>C-NMR

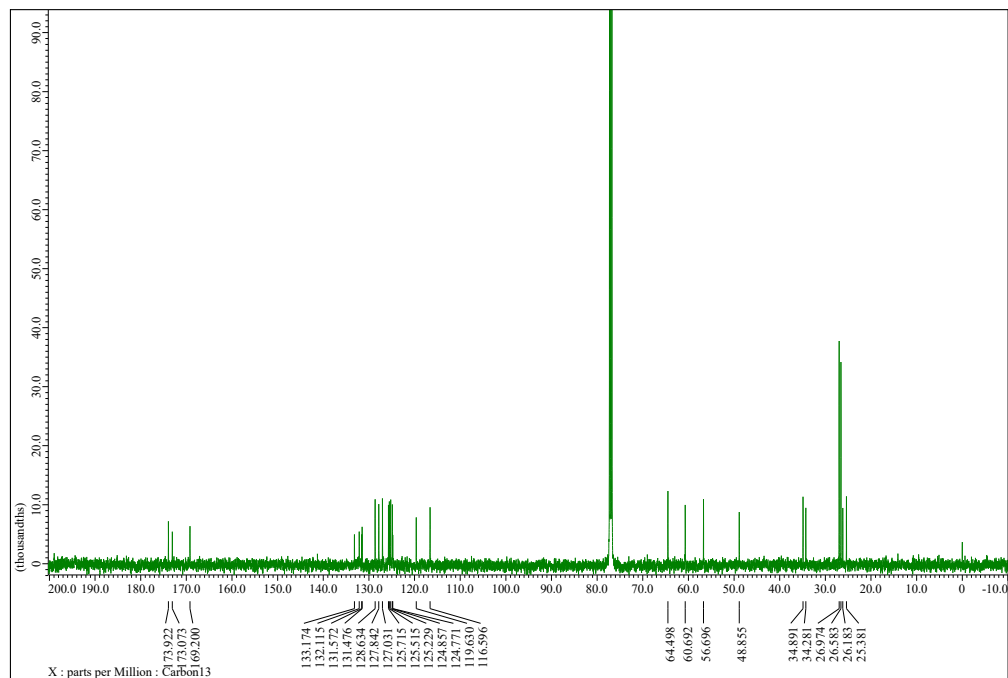

L-Tle- L-Tle- L-Pro-1-Pyr (6i) (Chemical Formula: C<sub>33</sub>H<sub>40</sub>N<sub>4</sub>O<sub>3</sub>)

# <sup>1</sup>H-NMR

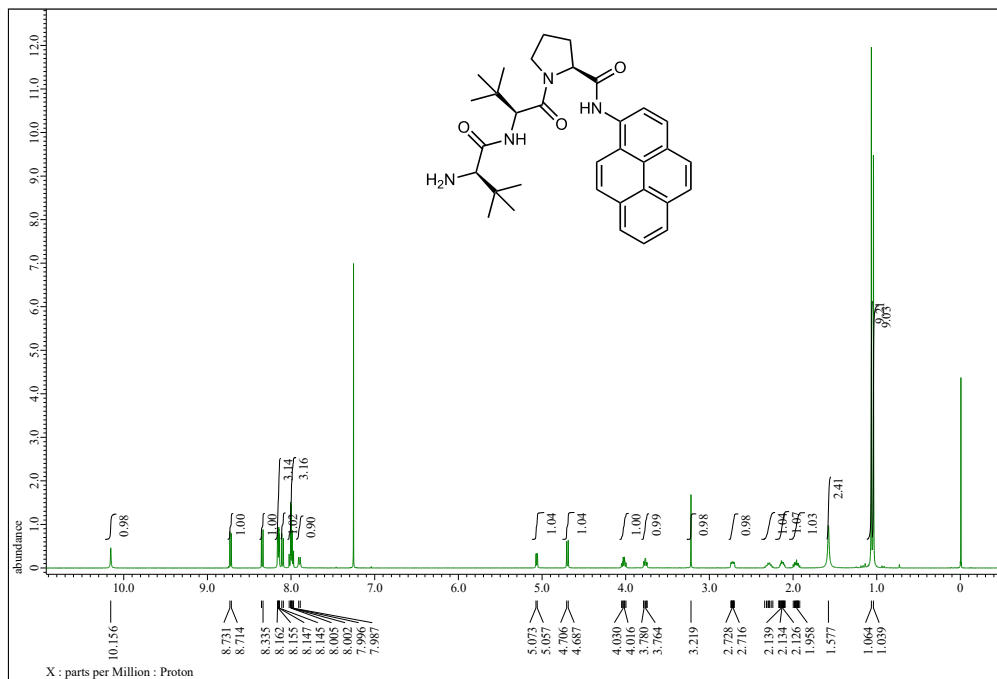

# <sup>13</sup>C-NMR

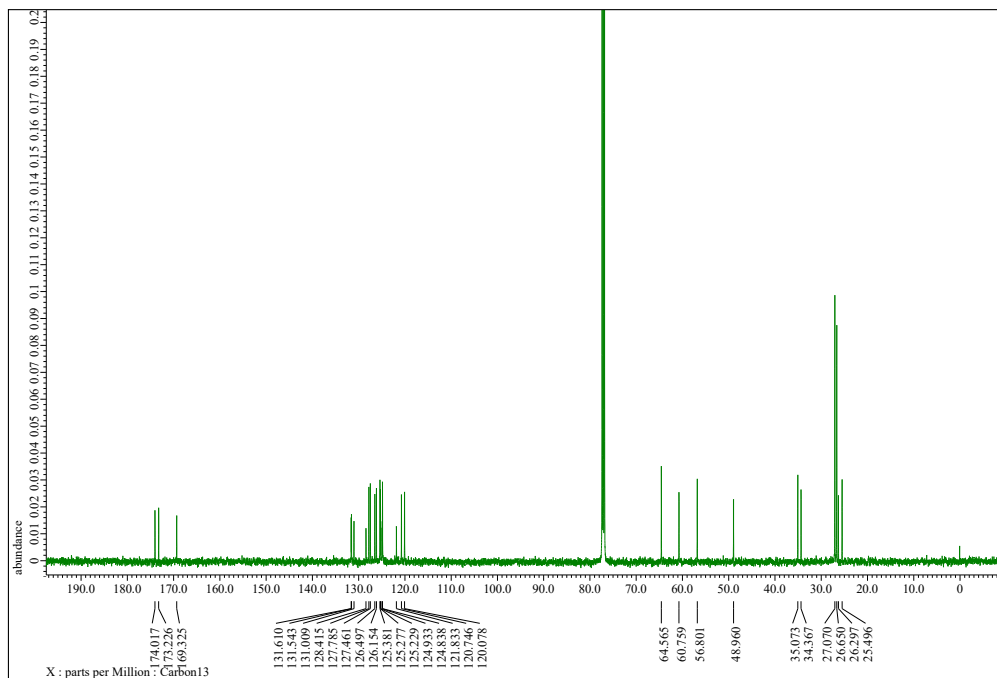

D-Tle- L-Tle- L-Pro-1-Naph (6j) (Chemical Formula: C<sub>27</sub>H<sub>38</sub>N<sub>4</sub>O<sub>3</sub>)

# <sup>1</sup>H-NMR

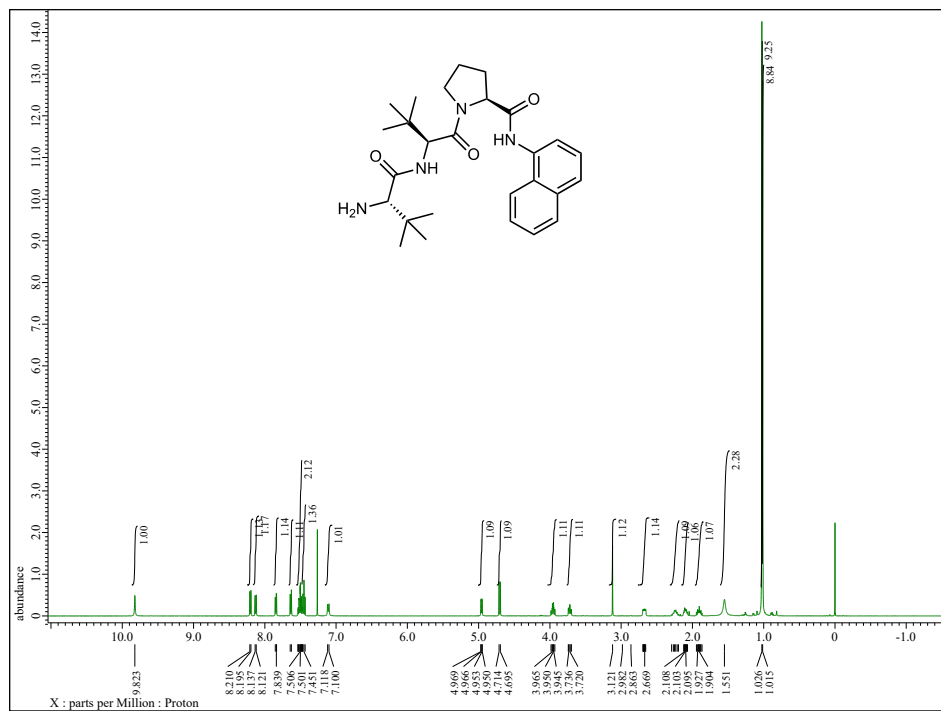

# <sup>13</sup>C-NMR

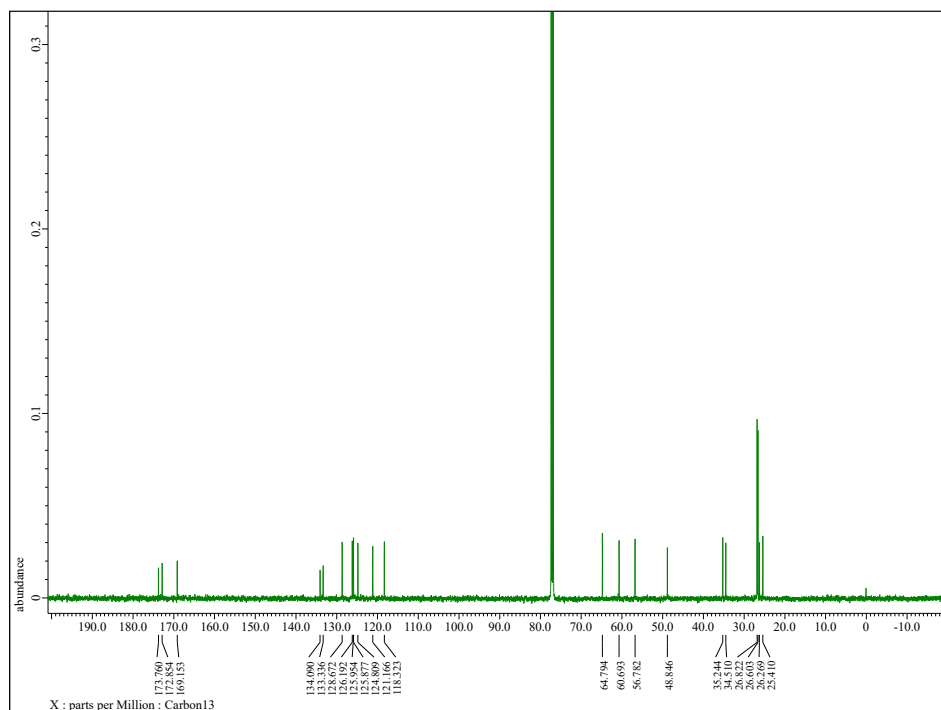

L-Tle- L-Tle-D-Pro-1-Naph (10) (Chemical Formula: C<sub>27</sub>H<sub>38</sub>N<sub>4</sub>O<sub>3</sub>)

# <sup>1</sup>H-NMR

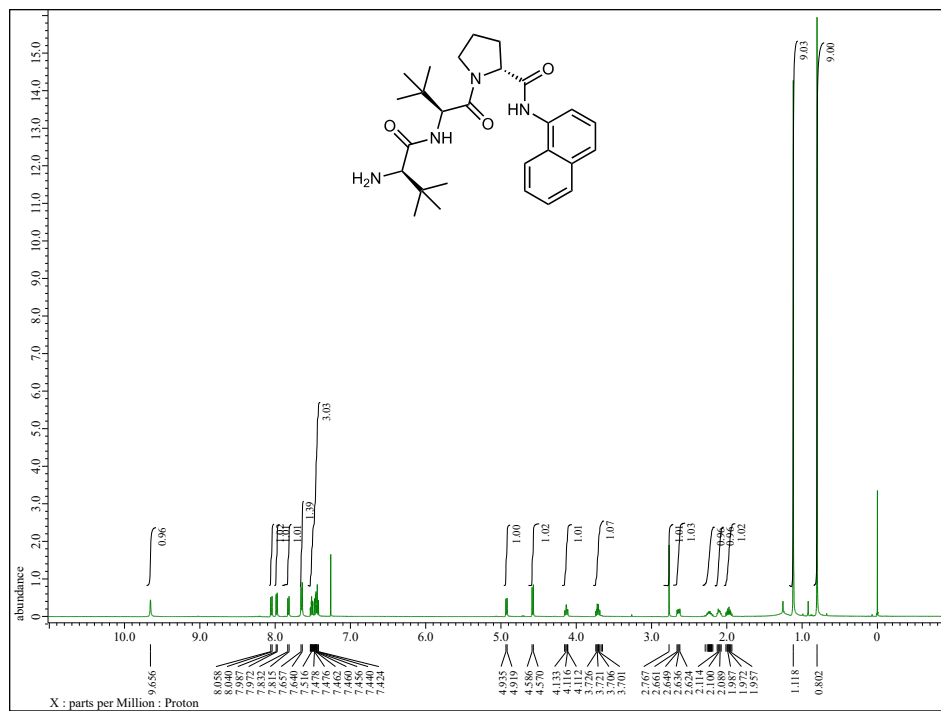

# <sup>13</sup>C-NMR

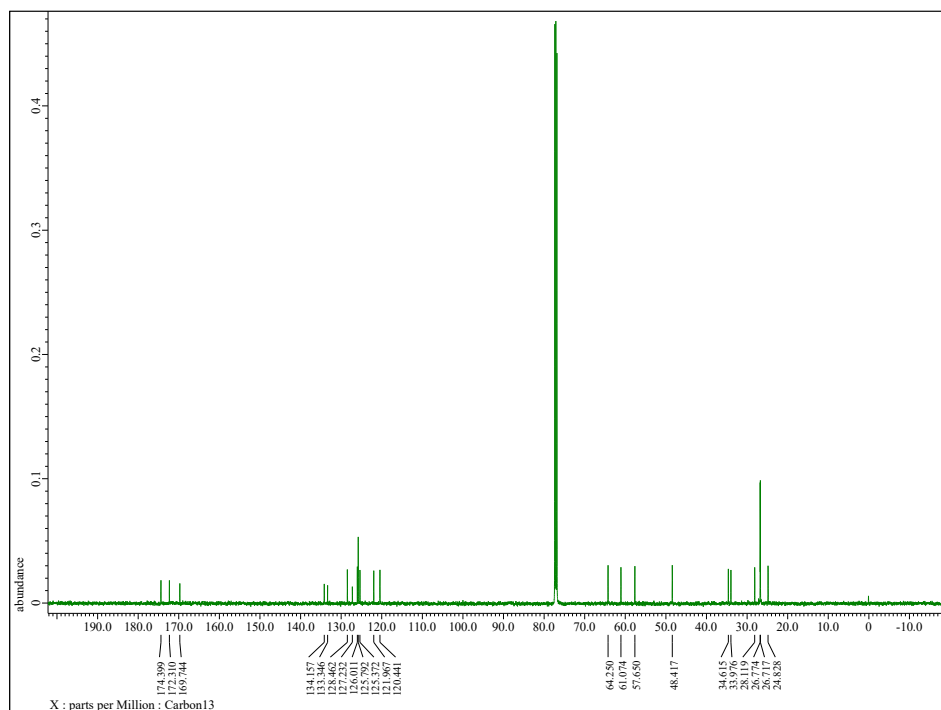

L-Tle- L-Tle- L-Aze-1-Naph (14a) (Chemical Formula: C<sub>26</sub>H<sub>36</sub>N<sub>4</sub>O<sub>3</sub>)



# <sup>1</sup>H-NMR

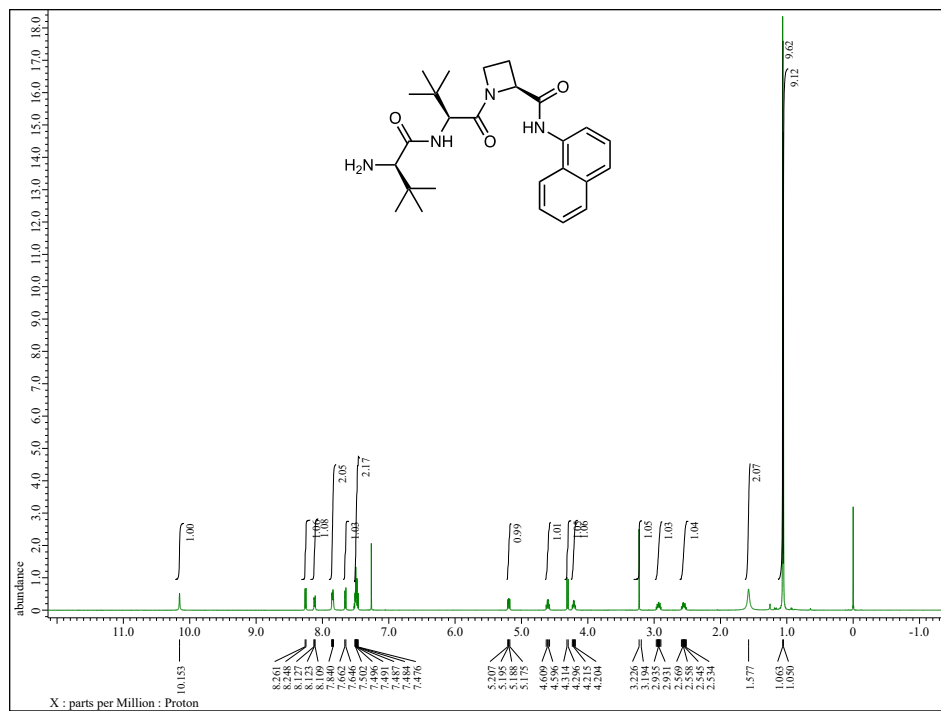

# <sup>13</sup>C-NMR

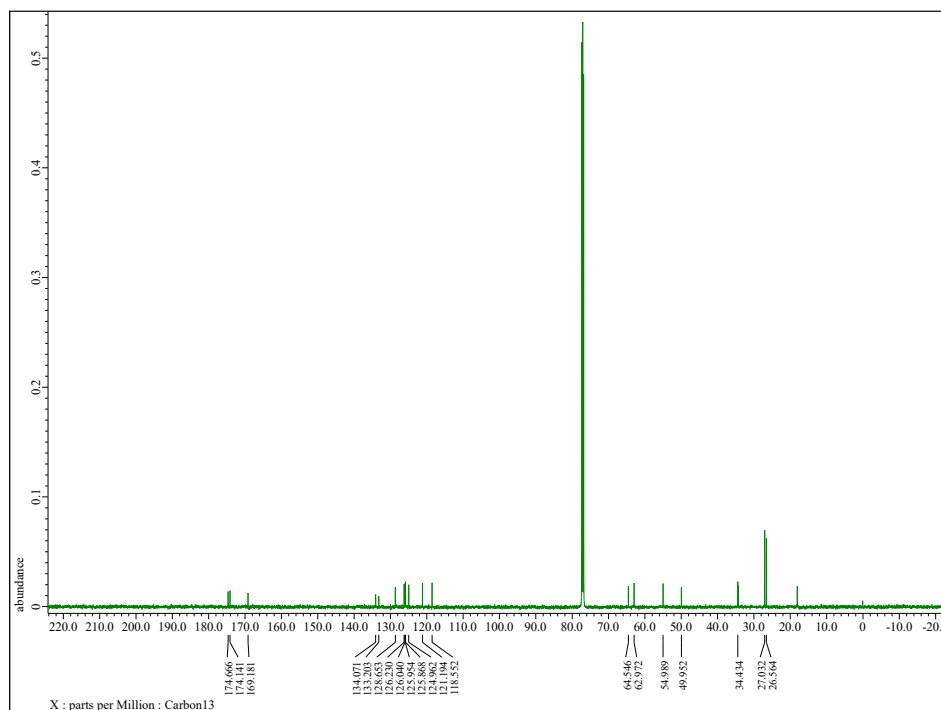

L-Tle- L-Tle- L-Pip-1-Naph (14b) (Chemical Formula: C<sub>26</sub>H<sub>36</sub>N<sub>4</sub>O<sub>3</sub>)

# <sup>1</sup>H-NMR

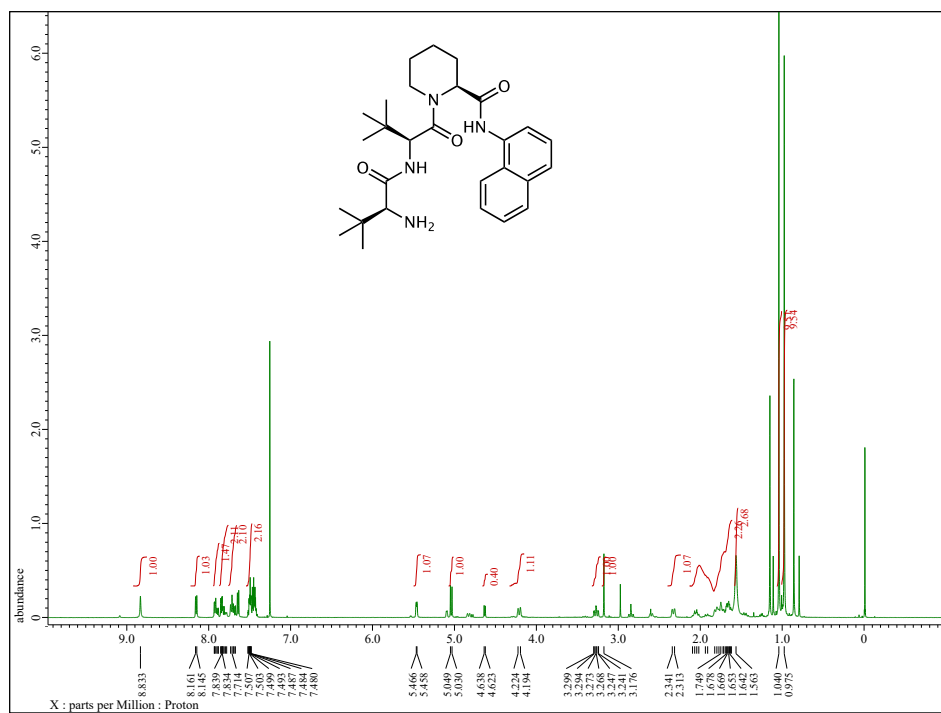

# <sup>13</sup>C-NMR

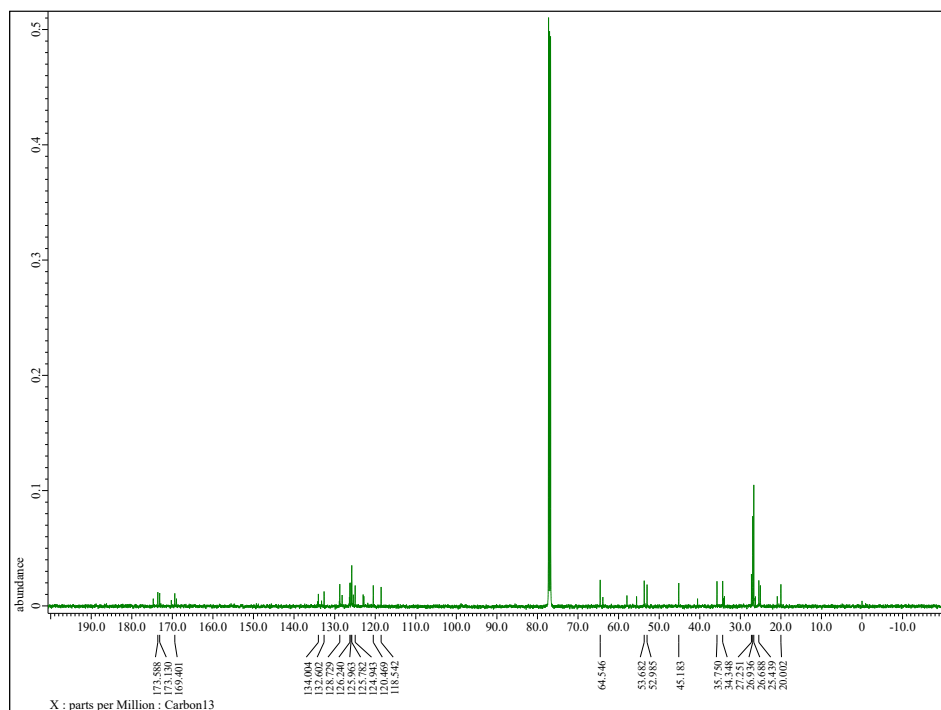

# 5. HPLC SPECTRA FOR ALDOL PRODUCTS

2-[Hydroxy-(4-nitrophenyl)-methyl]-cyclohexan-1-one (**17a**): *AD-H* column, *n*-hexane/*iso*-propanol = 90/10, flow rate = 1.0 mL/min,  $\lambda=254$  nm, *dr*(*syn/anti*) = 20:80, 98% *ee anti*.

### Racemic

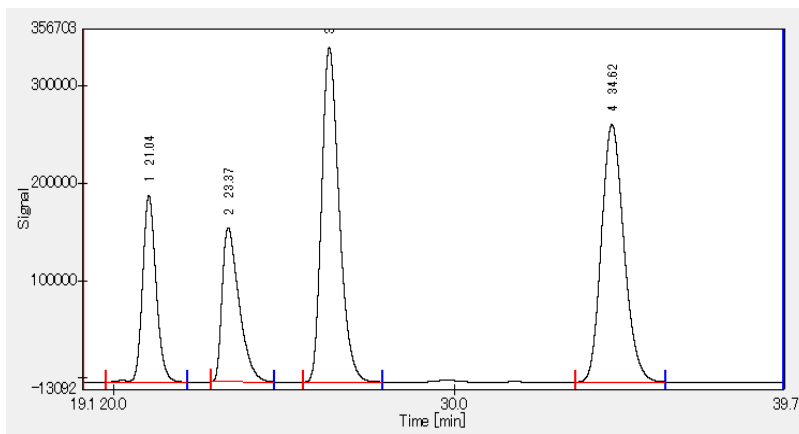

| No | Rt(min) | Area     | Area%   | Height | NTP     | Symmetry | Resolution |
|----|---------|----------|---------|--------|---------|----------|------------|
| 1  | 21.04   | 5240452  | 14.9537 | 191121 | 13076.6 | 1.18     | 2.769      |
| 2  | 23.37   | 5438855  | 15.5198 | 158075 | 9795.3  | 1.668    | 3.093      |
| 3  | 26.33   | 12231672 | 34.9032 | 342773 | 11799.8 | 1.3      | 7.509      |
| 4  | 34.62   | 12133538 | 34.6232 | 264130 | 12496.6 | 1.171    | *****      |
|    |         | 35044517 | 100     | 956099 |         |          |            |

### Chiral

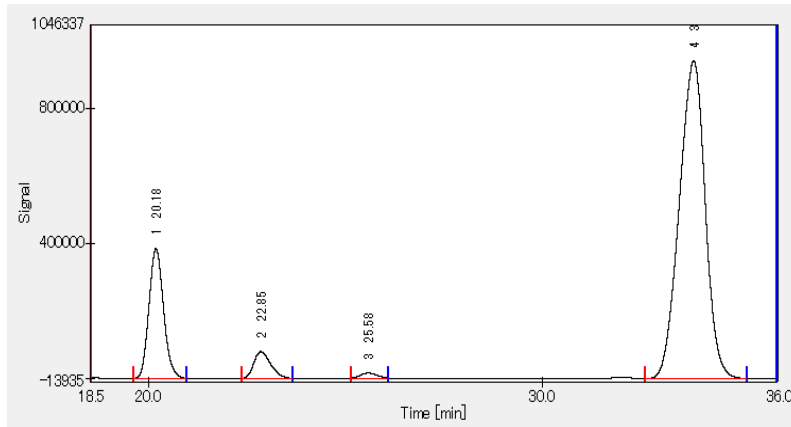

| No | Rt(min) | Area     | Area%   | Height  | NTP     | Symmetry | Resolution |
|----|---------|----------|---------|---------|---------|----------|------------|
| 1  | 20.18   | 9978690  | 17.8164 | 386306  | 13386.5 | 1.124    | 3.527      |
| 2  | 22.85   | 2386523  | 4.261   | 79647   | 12585.2 | 1.327    | 3.463      |
| 3  | 25.58   | 442223.8 | 0.7896  | 15253   | 17842   | 1.083    | 8.292      |
| 4  | 33.86   | 43201037 | 77.133  | 942262  | 12132.5 | 0.946    | *****      |
|    |         | 56008473 | 100     | 1423468 |         |          |            |

2-[Hydroxy-(2-nitrophenyl)-methyl]-cyclohexan-1-one (**17b**): AD-H column, *n*-hexane/*iso*-propanol: 90/10, flow rate = 1.0 mL/min,  $\lambda=254$  nm, *dr*(*syn/anti*) = 22:78, 99% *ee anti*.

### Racemic

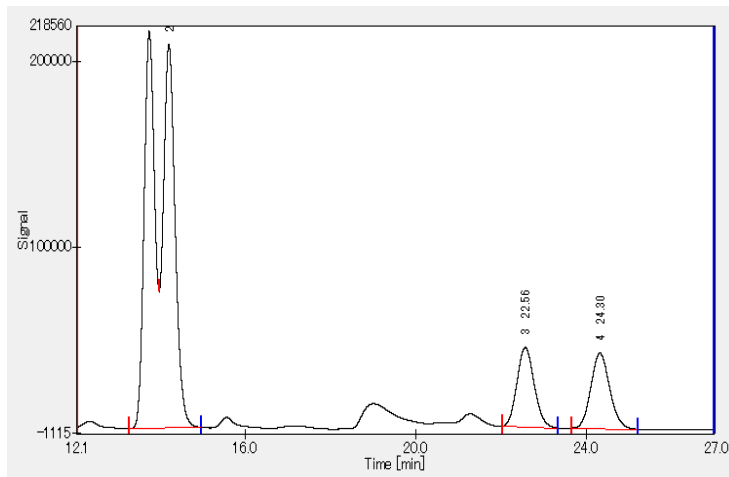

| No | Rt(min) | Area     | Area%   | Height | NTP     | Symmetry | Resolution |
|----|---------|----------|---------|--------|---------|----------|------------|
| 1  | 13.76   | 3755605  | 36.7729 | 213745 | 13879.1 | *****    | 0.935      |
| 2  | 14.22   | 4014459  | 39.3075 | 206530 | 12111.5 | *****    | 13.196     |
| 3  | 22.56   | 1199921  | 11.749  | 42778  | 14202.5 | 1.121    | 2.207      |
| 4  | 24.3    | 1242980  | 12.1706 | 40664  | 13856.4 | 1.125    | *****      |
|    |         | 10212964 | 100     | 503717 |         |          |            |

### Chiral

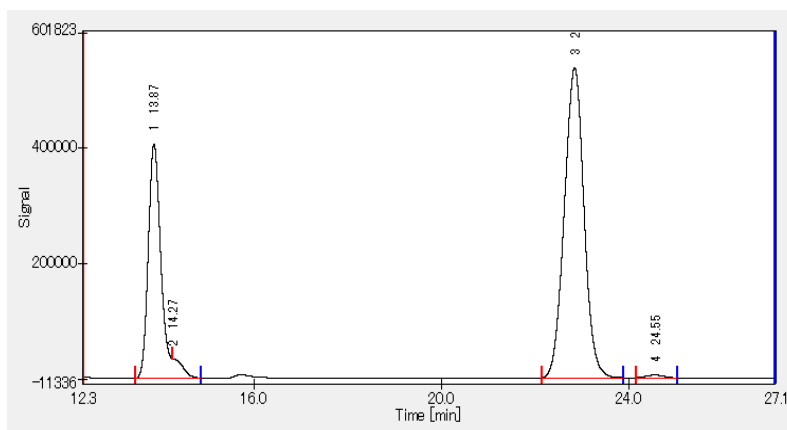

| No | Rt(min) | Area     | Area%   | Height | NTP     | Symmetry | Resolution |
|----|---------|----------|---------|--------|---------|----------|------------|
| 1  | 13.87   | 7491683  | 31.4608 | 407179 | 12854.3 | *****    | 0.899      |
| 2  | 14.27   | 498899.6 | 2.0951  | 33153  | 20339.9 | *****    | 14.58      |
| 3  | 22.84   | 15692161 | 65.8982 | 537934 | 13554.5 | 1.007    | 2.315      |
| 4  | 24.55   | 129992.9 | 0.5459  | 4947   | 20103.5 | 1.1      | *****      |
|    |         | 23812737 | 100     | 983213 |         |          |            |

2-[Hydroxy-(3-nitrophenyl)-methyl]-cyclohexan-1-one (**17c**): AD-H column, *n*-hexane/*iso* propanol = 90/10, flow rate = 1.0 mL/min,  $\lambda=254$  nm, *dr*(*syn/anti*) = 20:80, 99% *ee anti*.

### Racemic

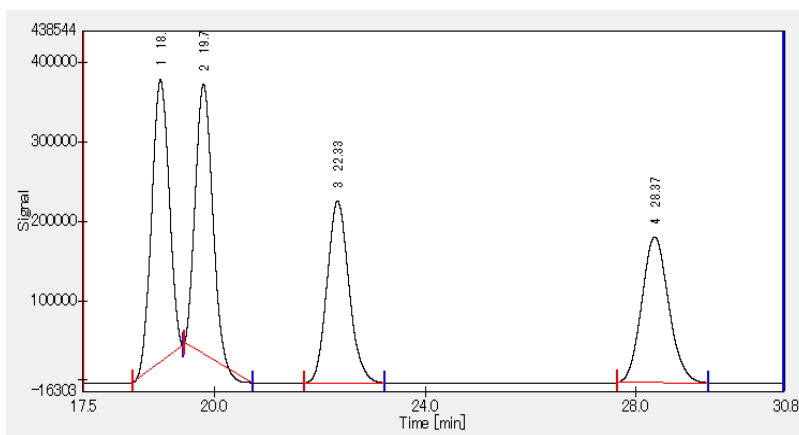

| No | Rt(min) | Area     | Area%   | Height  | NTP     | Symmetry | Resolution |
|----|---------|----------|---------|---------|---------|----------|------------|
| 1  | 18.96   | 8195506  | 28.2962 | 356520  | 15202.6 | 0.992    | 1.348      |
| 2  | 19.78   | 7550894  | 26.0706 | 339909  | 17291.7 | 1.124    | 3.67       |
| 3  | 22.33   | 6661845  | 23.001  | 229403  | 12859.2 | 1.14     | 6.884      |
| 4  | 28.37   | 6554983  | 22.6321 | 183740  | 13819.8 | 1.118    | *****      |
|    |         | 28963229 | 100     | 1109572 |         |          |            |

### Chiral

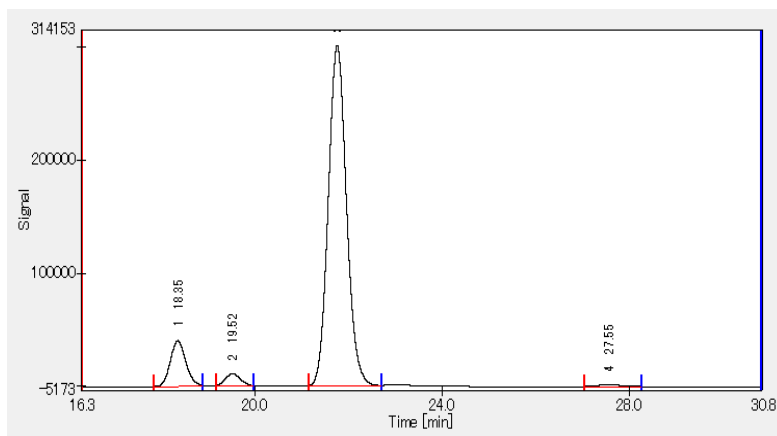

| No | Rt(min) | Area     | Area%  | Height | NTP     | Symmetry | Resolution |
|----|---------|----------|--------|--------|---------|----------|------------|
| 1  | 18.35   | 913986.4 | 9.822  | 40176  | 14255.7 | 1.1      | 1.932      |
| 2  | 19.52   | 233222.6 | 2.5063 | 10505  | 17166.7 | 1.129    | 3.379      |
| 3  | 21.76   | 8102028  | 87.067 | 301345 | 14369.2 | 1.093    | 7.259      |
| 4  | 27.55   | 56273    | 0.6047 | 1742   | 16035.2 | 1.149    | *****      |
|    |         | 9305510  | 100    | 353768 |         |          |            |

2-[Hydroxy-(2-bromophenyl)-methyl]-cyclohexan-1-one (**17d**): AD-H column, *n*-hexane/*iso*-propanol = 90/10, flow rate = 1.0 mL/min,  $\lambda=254$  nm, *dr*(*syn/anti*) = 25:75, 86% *ee anti*.

### Racemic

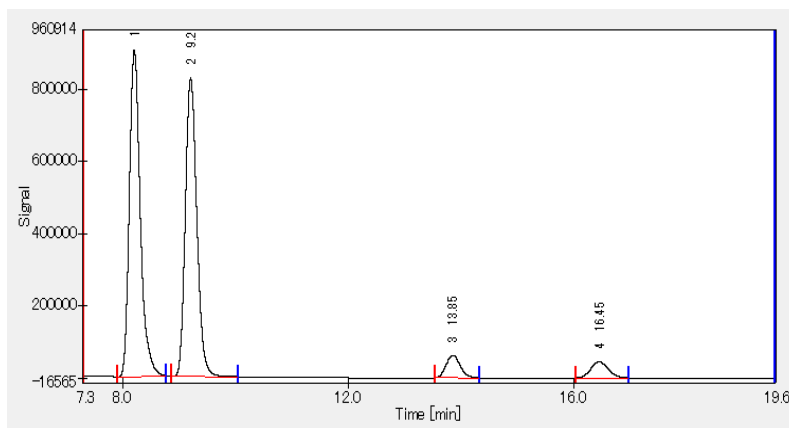

| No | Rt(min) | Area     | Area%   | Height  | NTP     | Symmetry | Resolution |
|----|---------|----------|---------|---------|---------|----------|------------|
| 1  | 8.21    | 12151134 | 46.9446 | 903908  | 8094.4  | 1.321    | 2.695      |
| 2  | 9.2     | 11685035 | 45.1439 | 826335  | 9644    | 1.191    | 11.028     |
| 3  | 13.85   | 1087515  | 4.2015  | 62664   | 14024.9 | 1.135    | 4.942      |
| 4  | 16.45   | 960282.2 | 3.7099  | 44662   | 12733.2 | 1.086    | *****      |
|    |         | 25883966 | 100     | 1837569 |         |          |            |

### Chiral

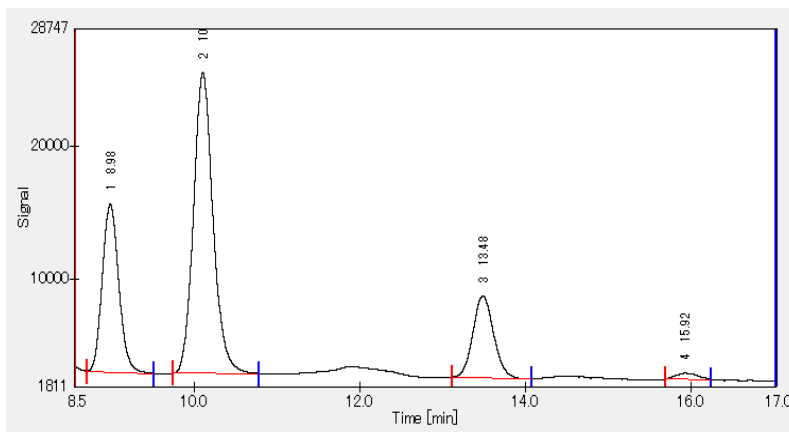

| No | Rt(min) | Area     | Area%   | Height | NTP     | Symmetry | Resolution |
|----|---------|----------|---------|--------|---------|----------|------------|
| 1  | 8.98    | 174521   | 26.4294 | 12623  | 9518.8  | 1.12     | 2.73       |
| 2  | 10.1    | 371724   | 56.2939 | 22626  | 8055.3  | 1.137    | 7.391      |
| 3  | 13.48   | 106086   | 16.0657 | 6163   | 13371.1 | 1.094    | 5.223      |
| 4  | 15.92   | 7996.8   | 1.211   | 452    | 18529   | 1.182    | *****      |
|    |         | 660327.8 | 100     | 41864  |         |          |            |

2-[Hydroxy-(3-bromophenyl)-methyl]-cyclohexan-1-one (**17e**): AD-H column, *n*-hexane/*iso*-propanol = 90/10, flow rate = 1.0 mL/min,  $\lambda=254$  nm, *dr*(*syn/anti*) = 25:75, 93% *ee anti*.

**Racemic**

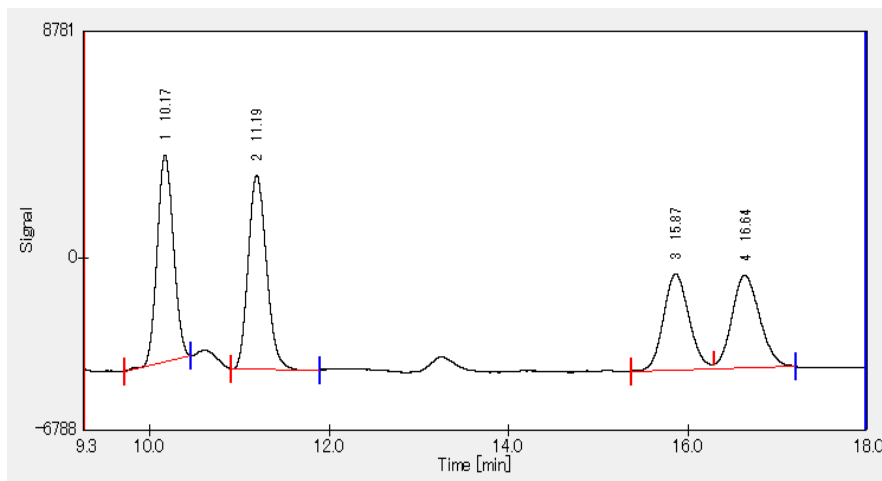

| No | Rt(min) | Area     | Area%   | Height | NTP     | Symmetry | Resolution |
|----|---------|----------|---------|--------|---------|----------|------------|
| 1  | 10.17   | 101584.5 | 28.2445 | 8074   | 14428.4 | 1.076    | 2.861      |
| 2  | 11.19   | 106307.2 | 29.5576 | 7574   | 14119.4 | 1.166    | 10.33      |
| 3  | 15.87   | 73941.53 | 20.5586 | 3746   | 14615.5 | 1.131    | 1.41       |
| 4  | 16.64   | 77828.37 | 21.6393 | 3620   | 13549.7 | 1.091    | *****      |
|    |         | 359661.6 | 100     | 23014  |         |          |            |

**Chiral**

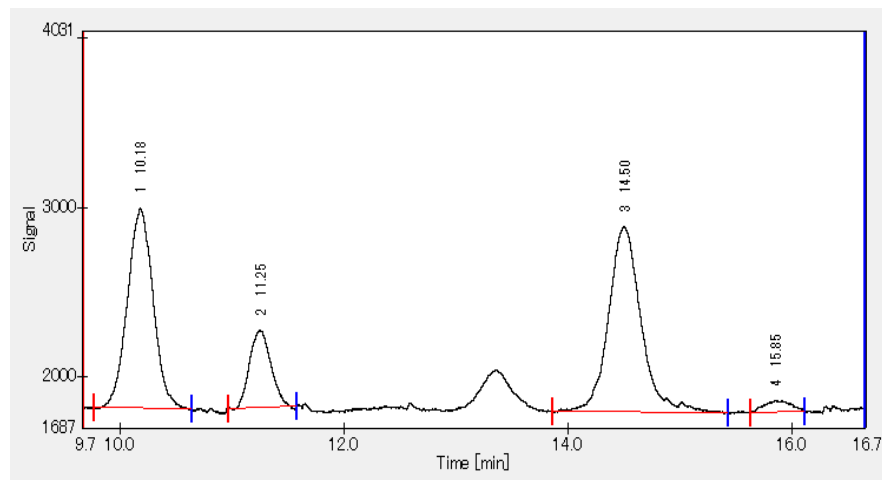

| No | Rt(min) | Area    | Area%   | Height | NTP     | Symmetry | Resolution |
|----|---------|---------|---------|--------|---------|----------|------------|
| 1  | 10.18   | 18803   | 39.2727 | 1178   | 9001.4  | 1.024    | 2.725      |
| 2  | 11.25   | 5898.4  | 12.3196 | 454    | 15990.6 | 1.08     | 7.282      |
| 3  | 14.5    | 22094.8 | 46.2481 | 1093   | 11685.5 | 1.136    | 2.843      |
| 4  | 15.85   | 1081.8  | 1.7595  | 66     | 23814.8 | 1.191    | *****      |
|    |         | 47878   | 100     | 2791   |         |          |            |

2-[Hydroxy-(4-bromophenyl)-methyl]-cyclohexan-1-one (**17f**): AD-H column, *n*-hexane/*iso*-propanol = 90/10, flow rate = 1.0 mL/min,  $\lambda=254$  nm, *dr*(*syn/anti*) = 23:77, 94% *ee anti*.

### Racemic

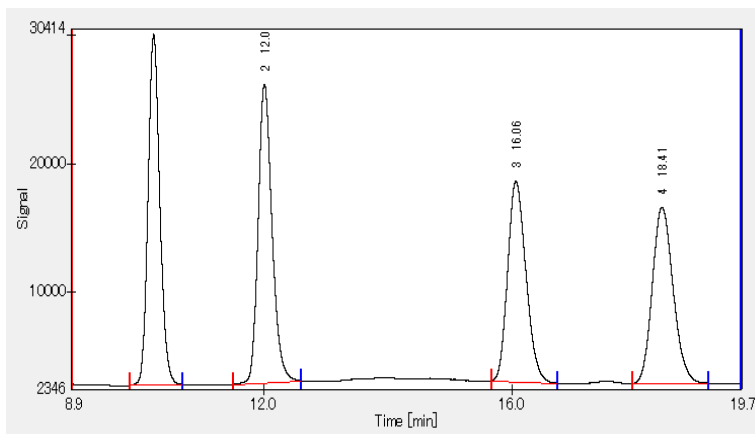

| No | Rt(min) | Area      | Area%   | Height | NTP     | Symmetry | Resolution |
|----|---------|-----------|---------|--------|---------|----------|------------|
| 1  | 10.23   | 358767    | 26.3765 | 27284  | 13113.7 | 1.144    | 4.588      |
| 2  | 12.01   | 360795.8  | 26.5256 | 23255  | 13087.1 | 1.227    | 8.316      |
| 3  | 16.06   | 320899.5  | 23.5925 | 15654  | 13484   | 1.198    | 3.983      |
| 4  | 18.41   | 319716.4  | 23.5055 | 13723  | 13799.9 | 1.158    | *****      |
|    |         | 1360178.7 | 100     | 79916  |         |          |            |

### Chiral

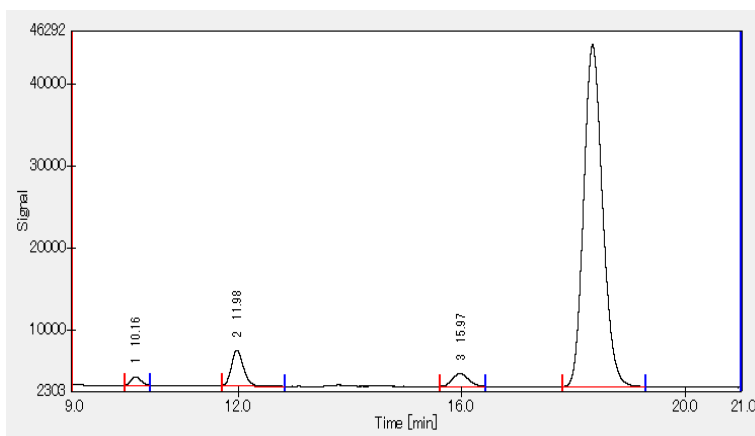

| No | Rt(min) | Area      | Area%   | Height | NTP     | Symmetry | Resolution |
|----|---------|-----------|---------|--------|---------|----------|------------|
| 1  | 10.16   | 12889.3   | 1.1854  | 1064   | 15408.8 | 1.205    | 4.983      |
| 2  | 11.98   | 64080.1   | 5.8933  | 4345   | 14236.7 | 1.172    | 8.503      |
| 3  | 15.97   | 31433.2   | 2.8909  | 1596   | 14121.6 | 1.137    | 4.055      |
| 4  | 18.35   | 978930.6  | 90.0304 | 41703  | 13446.5 | 1.149    | *****      |
|    |         | 1087333.2 | 100     | 48708  |         |          |            |



2-[Hydroxy-(4-chlorophenyl)-methyl]-cyclohexan-1-one (**17g**): AD-H column, *n*-hexane/*iso*-propanol = 90/10, flow rate = 1.0 mL/min,  $\lambda=254$  nm, *dr*(*syn*/*anti*) = 14:86, 98% *ee anti*.

### Racemic

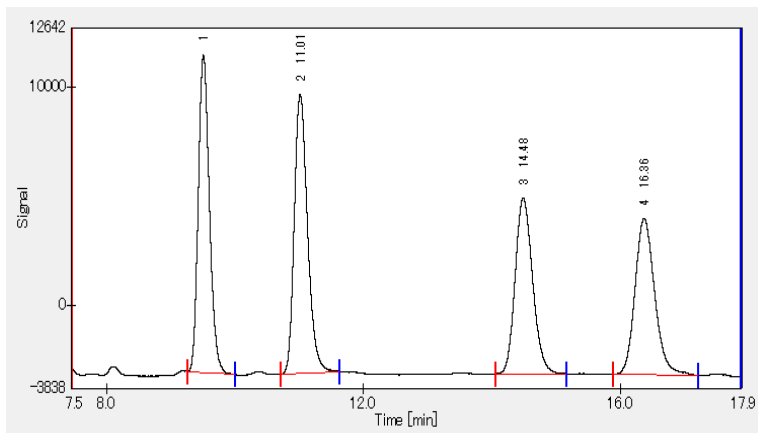

| No | Rt(min) | Area     | Area%   | Height | NTP     | Symmetry | Resolution |
|----|---------|----------|---------|--------|---------|----------|------------|
| 1  | 9.51    | 174051   | 26.3917 | 14503  | 13752.2 | 1.205    | 4.256      |
| 2  | 11.01   | 182351.5 | 27.6504 | 12750  | 13177.2 | 1.266    | 7.802      |
| 3  | 14.48   | 151525.2 | 22.9761 | 8054   | 13120.7 | 1.169    | 3.504      |
| 4  | 16.36   | 151562.6 | 22.9818 | 7129   | 13307.9 | 1.174    | *****      |
|    |         | 659490.3 | 100     | 42436  |         |          |            |

### Chiral

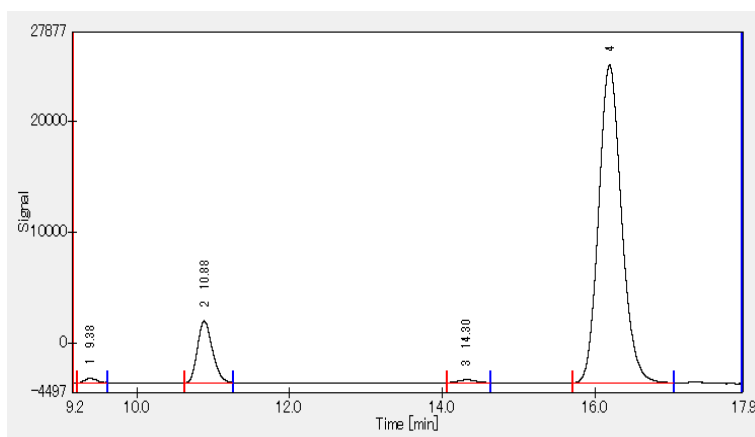

| No | Rt(min) | Area     | Area%   | Height | NTP     | Symmetry | Resolution |
|----|---------|----------|---------|--------|---------|----------|------------|
| 1  | 9.38    | 4476.2   | 0.6585  | 406    | 17170.7 | 1.23     | 4.591      |
| 2  | 10.88   | 75408    | 11.0934 | 5561   | 14065.5 | 1.199    | 8.609      |
| 3  | 14.3    | 4368.4   | 0.6426  | 285    | 17972.8 | 1.151    | 3.806      |
| 4  | 16.19   | 595500.9 | 87.6054 | 28552  | 13144.6 | 1.138    | *****      |

679753.5

100

34804

2-[Hydroxy-(4-cyanophenyl)-methyl]-cyclohexan-1-one (**17h**): AD-H column, *n*-hexane/*iso*-propanol = 90/10, flow rate = 1.0 mL/min,  $\lambda$ =254 nm, *dr*(*syn/anti*) = 36:67, 94% *ee anti*.

### Racemic

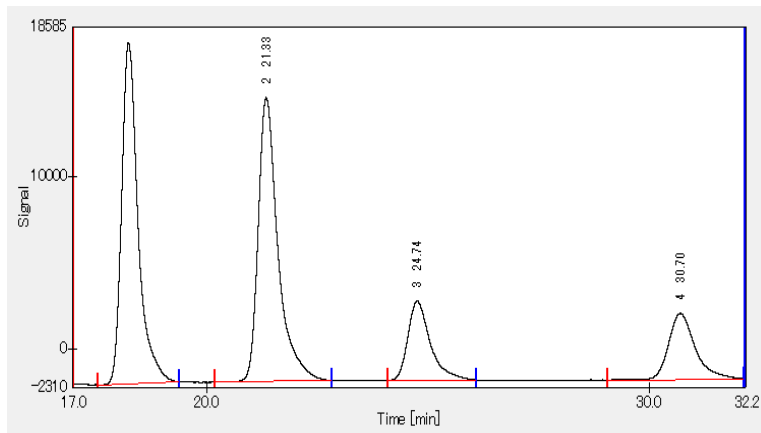

| No | Rt(min) | Area     | Area%   | Height | NTP     | Symmetry | Resolution |
|----|---------|----------|---------|--------|---------|----------|------------|
| 1  | 18.22   | 508859.8 | 37.9291 | 19769  | 10292.2 | 1.496    | 3.903      |
| 2  | 21.33   | 510804.8 | 38.074  | 16448  | 9458.9  | 1.591    | 3.627      |
| 3  | 24.74   | 162379.9 | 12.1034 | 4586   | 9728.1  | 1.534    | 5.521      |
| 4  | 30.7    | 159564.6 | 11.8935 | 3827   | 11286.7 | 1.368    | *****      |
|    |         | 1341609  | 100     | 44630  |         |          |            |

### Chiral

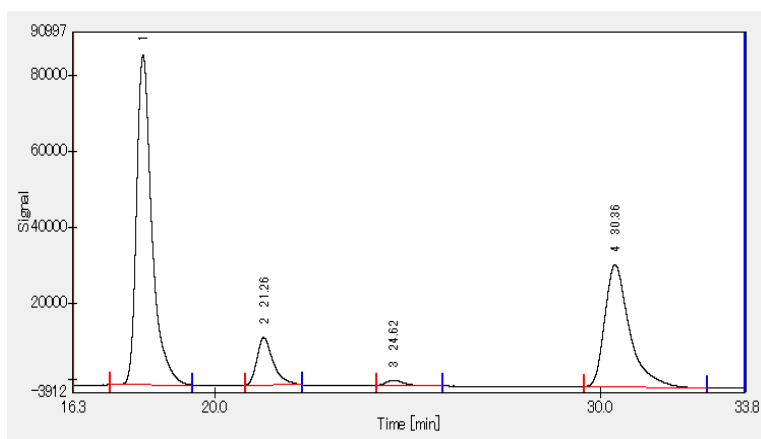

| No | Rt(min) | Area    | Area%   | Height | NTP     | Symmetry | Resolution |
|----|---------|---------|---------|--------|---------|----------|------------|
| 1  | 18.13   | 2393442 | 56.2981 | 86913  | 9005.6  | 1.513    | 3.954      |
| 2  | 21.26   | 363774  | 8.5566  | 12441  | 10731.6 | 1.467    | 4.019      |
| 3  | 24.62   | 45147.8 | 1.062   | 1449   | 13440.7 | 1.46     | 5.455      |
| 4  | 30.36   | 1449008 | 34.0833 | 32243  | 9325.3  | 1.582    | *****      |

4251372 100 133046

2-[Hydroxy-phenyl-methyl]-cyclohexan-1-one (**17i**): OD-H column, n-hexane/iso-propanol = 90/10, flow rate = 0.5 mL/min,  $\lambda=220$  nm, dr(syn/anti) = 25:75, 60% ee anti.

**Racemic**

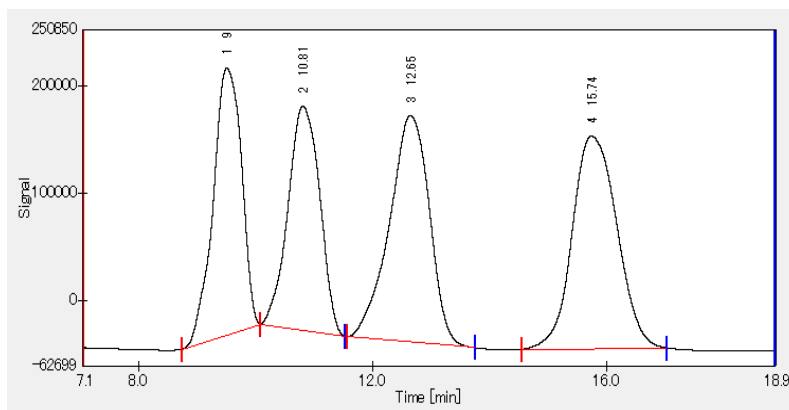

| No | Rt(min) | Area     | Area%   | Height | NTP    | Symmetry | Resolution |
|----|---------|----------|---------|--------|--------|----------|------------|
| 1  | 9.51    | 8371984  | 22.7175 | 249127 | 1795.1 | 0.92     | 1.369      |
| 2  | 10.81   | 7922735  | 21.4985 | 209345 | 1869.5 | 0.978    | 1.599      |
| 3  | 12.65   | 10048378 | 27.2664 | 211531 | 1514.4 | 0.889    | 2.319      |
| 4  | 15.74   | 10509479 | 28.5176 | 198335 | 2132   | 1.101    | *****      |
|    |         | 36852575 | 100     | 868338 |        |          |            |

**Chiral**

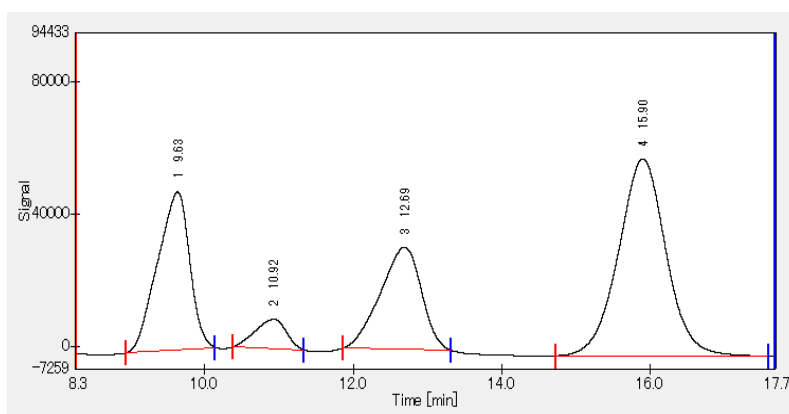

| No | Rt(min) | Area     | Area%   | Height | NTP    | Symmetry | Resolution |
|----|---------|----------|---------|--------|--------|----------|------------|
| 1  | 9.63    | 1432053  | 25.89   | 47698  | 2260.8 | 0.847    | 1.64       |
| 2  | 10.92   | 257567.9 | 4.6566  | 8881   | 3240.3 | 0.862    | 1.956      |
| 3  | 12.69   | 1189169  | 21.4989 | 30971  | 2372.2 | 0.857    | 2.85       |
| 4  | 15.9    | 2652509  | 47.9545 | 59521  | 2764.3 | 1.01     | *****      |

5531299 100 147071

2-[Hydroxy-(4-(Methoxyphenyl)-methyl)-cyclopentan-1-one (**17j**): AD column, *n*-hexane/*iso*-propanol = 98/2, flow rate = 0.4 mL/min,  $\lambda=254$  nm, *dr*(*syn/anti*) = 26:74, 58% *ee anti*.

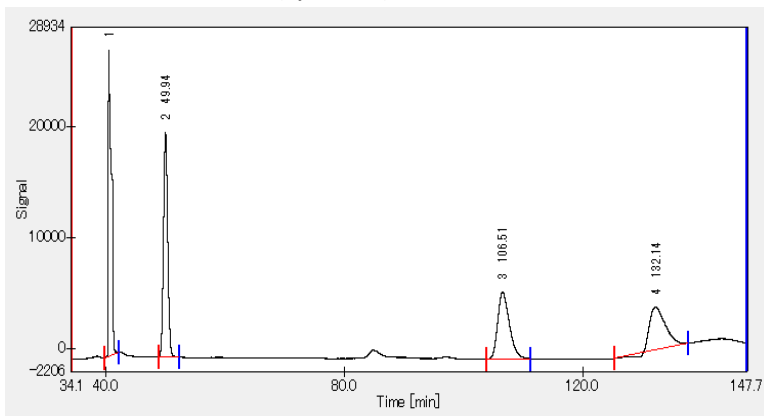

| No | Rt(min) | Area     | Area%   | Height | NTP     | Symmetry | Resolution |
|----|---------|----------|---------|--------|---------|----------|------------|
| 1  | 40.41   | 1007122  | 28.7766 | 27575  | 30966   | 2.799    | 8.526      |
| 2  | 49.94   | 993246.2 | 28.3801 | 20243  | 23063.2 | 1.086    | 22.747     |
| 3  | 106.51  | 817996.4 | 23.3727 | 6035   | 13559.2 | 1.337    | 5.911      |
| 4  | 132.14  | 681436   | 19.4707 | 3875   | 11113.8 | 1.646    | *****      |
|    |         | 3499801  | 100     | 57728  |         |          |            |

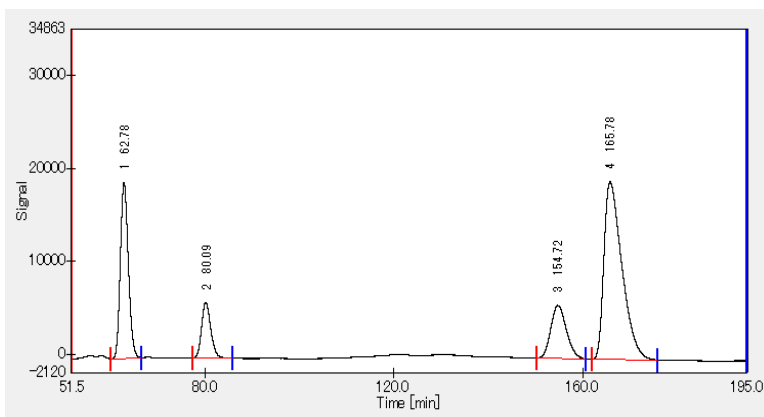

| No | Rt(min) | Area     | Area%   | Height | NTP    | Symmetry | Resolution |
|----|---------|----------|---------|--------|--------|----------|------------|
| 1  | 62.78   | 2233025  | 23.6718 | 18898  | 6391.6 | 1.162    | 5.11       |
| 2  | 80.09   | 807392.2 | 8.559   | 5959   | 7769.2 | 1.192    | 15.039     |
| 3  | 154.72  | 1327962  | 14.0774 | 5731   | 9679.7 | 1.176    | 1.638      |
| 4  | 165.78  | 5064899  | 53.6918 | 19127  | 8435.6 | 1.701    | *****      |
|    |         | 9433278  | 100     | 49715  |        |          |            |

2-[Hydroxy-(4-(nitrophenyl)-methyl)-cyclopentan-1-one (**17m**): IC column, *n*-hexane/*iso*-propanol = 85/15, flow rate = 0.8 mL/min,  $\lambda$ =254 nm, *dr*(*syn/anti*) = 15:85, 93% *ee anti*.

**Racemic**

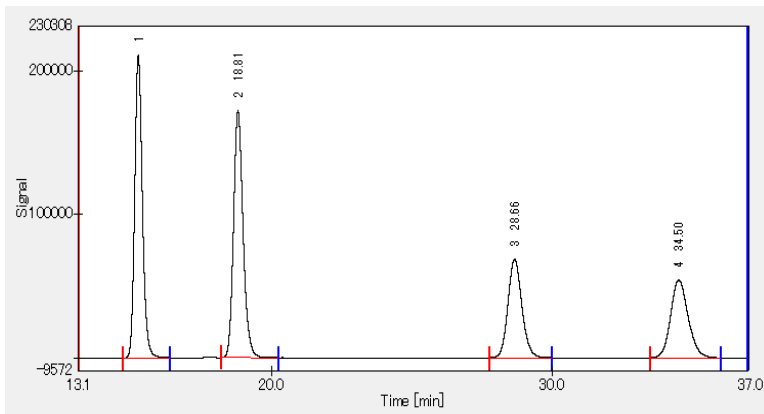

| No | Rt(min) | Area     | Area%   | Height | NTP     | Symmetry | Resolution |
|----|---------|----------|---------|--------|---------|----------|------------|
| 1  | 15.27   | 3987374  | 31.2444 | 210514 | 14288.7 | 1.174    | 6.157      |
| 2  | 18.81   | 4063273  | 31.8391 | 172008 | 13772.7 | 1.187    | 12.497     |
| 3  | 28.66   | 2365768  | 18.5378 | 68392  | 15046   | 1.12     | 5.534      |
| 4  | 34.5    | 2345470  | 18.3787 | 54082  | 13744.1 | 1.145    | *****      |
|    |         | 12761884 | 100     | 504996 |         |          |            |

**Chiral**

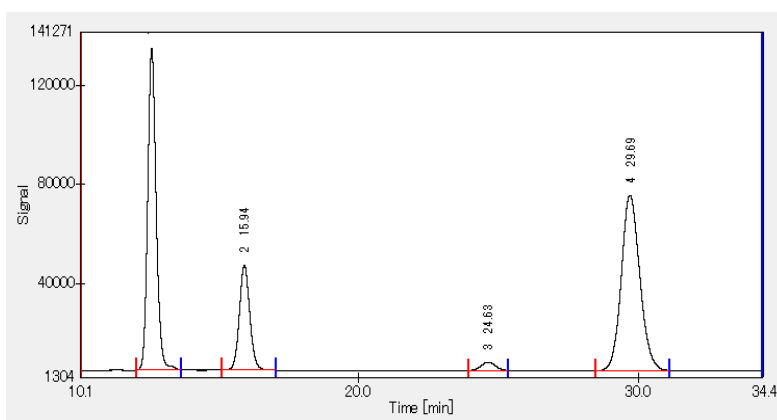

| No | Rt(min) | Area    | Area%   | Height | NTP    | Symmetry | Resolution |
|----|---------|---------|---------|--------|--------|----------|------------|
| 1  | 12.64   | 2731639 | 37.8848 | 130327 | 7998.9 | 1.133    | 5.241      |
| 2  | 15.94   | 1094448 | 15.1788 | 42609  | 8449.1 | 1.088    | 10.577     |
| 3  | 24.63   | 119718  | 1.6604  | 3432   | 10795  | 1.032    | 4.611      |

4        29.69    3264572    45.276    71105    9074.3    1.111    \*\*\*\*\*  
                                          7210377    100        247473

2-[Hydroxy(4-nitrophenyl)-methyl]-cycloheptan-1-one (**17n**): AD-H column, *n*-hexane/iso-propanol = 90/10, flow rate = 1.0 mL/min,  $\lambda$ =254 nm, (*syn/anti*) = 15:85, 91% ee *anti*.

**Racemic**

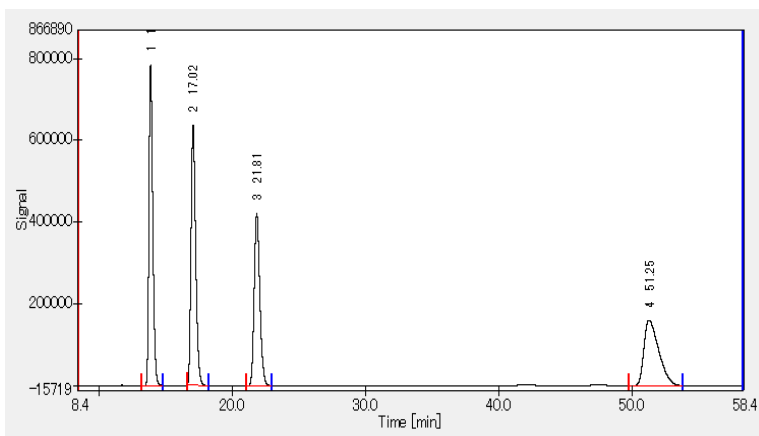

| No | Rt(min) | Area     | Area%   | Height  | NTP     | Symmetry | Resolution |
|----|---------|----------|---------|---------|---------|----------|------------|
| 1  | 13.84   | 15607317 | 27.8346 | 784338  | 10337.7 | 1.321    | 5.304      |
| 2  | 17.02   | 15382574 | 27.4338 | 636843  | 10781.7 | 1.328    | 6.576      |
| 3  | 21.81   | 12465413 | 22.2313 | 421084  | 11888.9 | 1.206    | 20.16      |
| 4  | 51.25   | 12616274 | 22.5003 | 161437  | 9346    | 1.601    | *****      |
|    |         | 56071579 | 100     | 2003702 |         |          |            |

**Chiral**

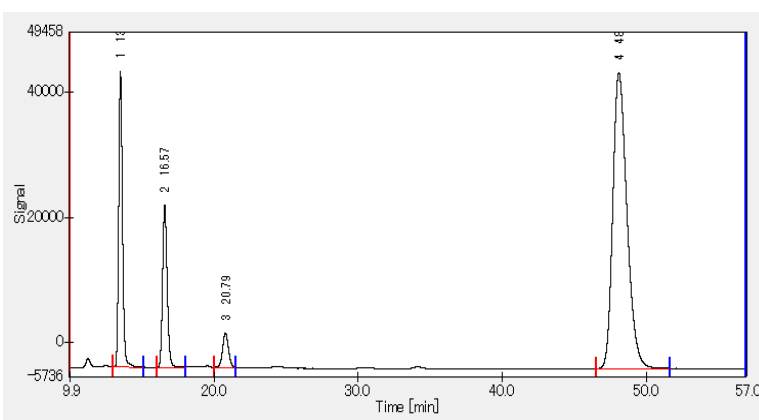

| No | Rt(min) | Area     | Area%   | Height | NTP     | Symmetry | Resolution |
|----|---------|----------|---------|--------|---------|----------|------------|
| 1  | 13.49   | 865645.6 | 17.913  | 47269  | 12289.6 | 1.165    | 5.676      |
| 2  | 16.57   | 578449.8 | 11.97   | 25978  | 12362.9 | 1.175    | 6.258      |
| 3  | 20.79   | 154673.9 | 3.2007  | 5507   | 12140.8 | 1.037    | 21.068     |
| 4  | 48.1    | 3233735  | 66.9163 | 47364  | 10962.4 | 1.293    | *****      |

4832505 100 126118

2-[-Hydroxy-(4-(nitrophenyl)-methyl)-4-methylcyclohexan-1-one (**17o**): AD-H column, *n*-hexane/iso-propanol: 90/10, flow Rate = 1.0 mL/min,  $\lambda=254$  nm, (*syn/anti*) =21:79, 90% ee anti.

**Racemic**

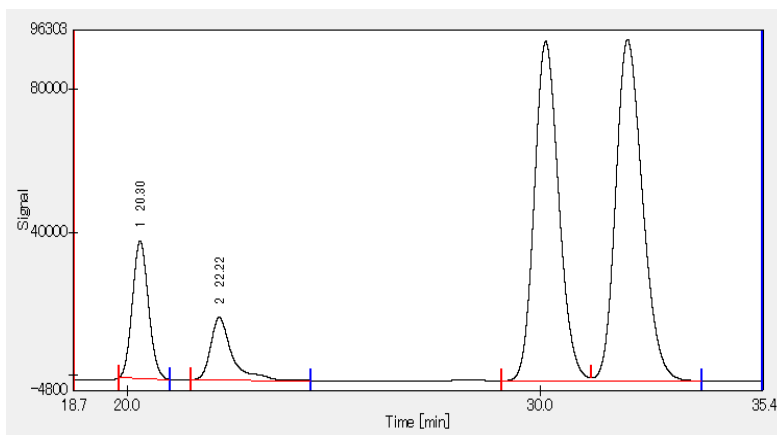

| No | Rt(min) | Area     | Area%   | Height | NTP     | Symmetry | Resolution |
|----|---------|----------|---------|--------|---------|----------|------------|
| 1  | 20.3    | 1048193  | 10.5526 | 38680  | 12286.6 | 1.1      | 2.232      |
| 2  | 22.22   | 626136.4 | 6.3036  | 17500  | 8088.4  | 1.774    | 7.557      |
| 3  | 30.14   | 3922313  | 39.4875 | 95190  | 12102.3 | 1.146    | 1.727      |
| 4  | 32.13   | 4336401  | 43.6563 | 95707  | 11372.1 | 1.219    | *****      |
|    |         | 9933043  | 100     | 247077 |         |          |            |

**Chiral**

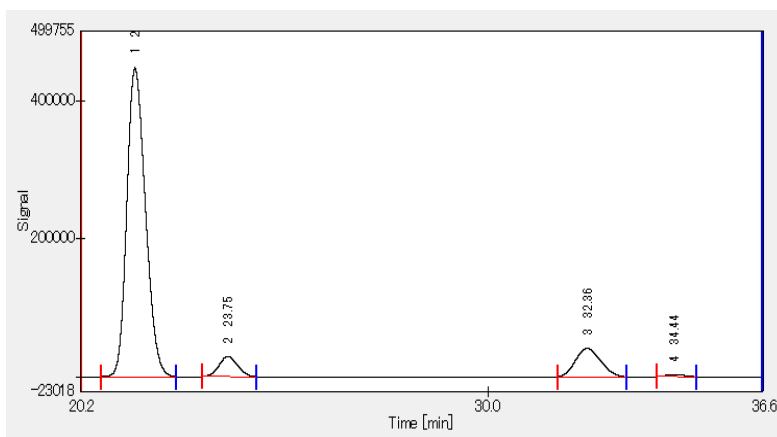

| No | Rt(min) | Area     | Area%   | Height | NTP     | Symmetry | Resolution |
|----|---------|----------|---------|--------|---------|----------|------------|
| 1  | 21.53   | 13881921 | 83.4334 | 447870 | 10875.4 | 1.22     | 2.658      |
| 2  | 23.75   | 918263.4 | 5.519   | 29761  | 12507.1 | 1.075    | 8.677      |
| 3  | 32.36   | 1745002  | 10.4878 | 41387  | 13024.4 | 1.145    | 2.126      |

4      34.44      93137.8      0.5598      2798      27833.2      1.164      \*\*\*\*\*  
                                          16638324      100      521816

6-[Hydroxy-(4-nitro-phenyl)-methyl]-2,2-dimethyl-1,3-dioxan-5-one (**17p**): AD-H column, *n*-hexane/*iso*-propanol = 90/10, flow rate = 1.0 mL/min,  $\lambda=254$  nm, *dr*(*syn/anti*) = 30:70, 68% *ee anti*.

**Racemic**

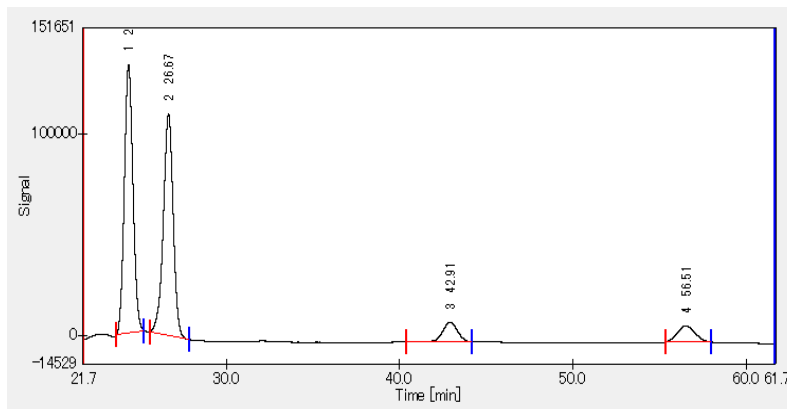

| No | Rt(min) | Area     | Area%   | Height | NTP     | Symmetry | Resolution |
|----|---------|----------|---------|--------|---------|----------|------------|
| 1  | 24.36   | 4570692  | 45.6075 | 132166 | 10993.2 | 1.083    | 2.303      |
| 2  | 26.67   | 4297609  | 42.8826 | 109336 | 9875.9  | 0.928    | 12.319     |
| 3  | 42.91   | 584345.3 | 5.8307  | 9773   | 12064.8 | 1.025    | 7.85       |
| 4  | 56.51   | 569147.4 | 5.6791  | 7958   | 14105.4 | 1.092    | *****      |
|    |         | 10021794 | 100     | 259233 |         |          |            |

**Chiral**

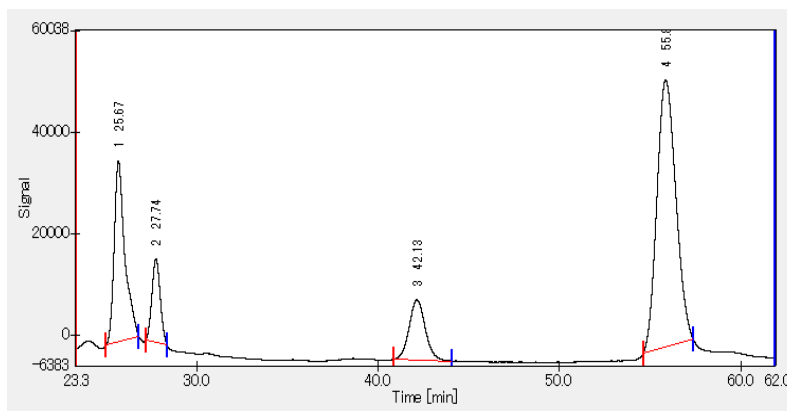

| No | Rt(min) | Area     | Area%   | Height | NTP     | Symmetry | Resolution |
|----|---------|----------|---------|--------|---------|----------|------------|
| 1  | 25.67   | 1464435  | 22.3966 | 35764  | 6690.1  | 1.445    | 1.965      |
| 2  | 27.74   | 522822.1 | 7.9959  | 16511  | 16972.3 | 1.06     | 11.415     |
| 3  | 42.13   | 731068.2 | 11.1807 | 11874  | 10180.2 | 1.08     | 7.594      |
| 4  | 55.87   | 3820323  | 58.4268 | 52735  | 13165.2 | 1.132    | *****      |
|    |         | 6538649  | 100     | 116884 |         |          |            |



3-[Hydroxy-[4-(nitrophenyl)-methyl]-dihydro-2H-pyran-4-one (**17q**): *AD-H* column, *n*-hexane/*iso*-propanol = 90/10, flow rate = 1.0 mL/min,  $\lambda=254$  nm, *dr*(*syn/anti*) = 13:87, 94% *ee anti*.

**Racemic**

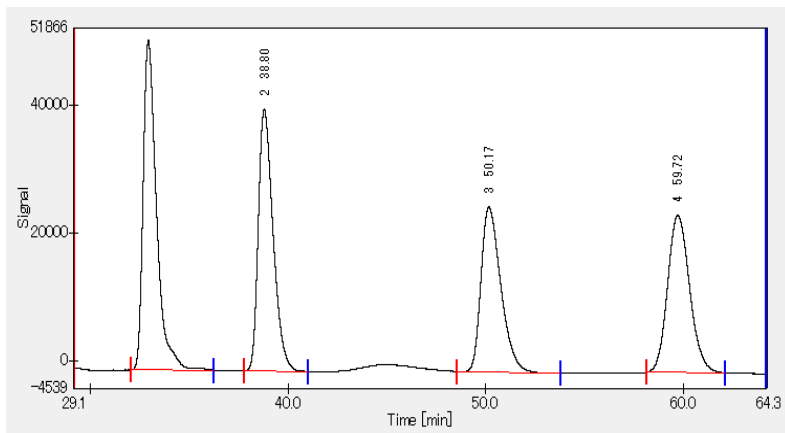

| No | Rt(min) | Area    | Area%   | Height | NTP     | Symmetry | Resolution |
|----|---------|---------|---------|--------|---------|----------|------------|
| 1  | 32.93   | 2427987 | 29.3593 | 51563  | 11220.2 | 1.71     | 4.428      |
| 2  | 38.8    | 2129583 | 25.751  | 40954  | 12179.1 | 1.416    | 6.895      |
| 3  | 50.17   | 1803880 | 21.8126 | 25839  | 11240   | 1.416    | 4.799      |
| 4  | 59.72   | 1908462 | 23.0772 | 24589  | 13101.9 | 1.165    | *****      |
|    |         | 8269912 | 100     | 142945 |         |          |            |

**Chiral**

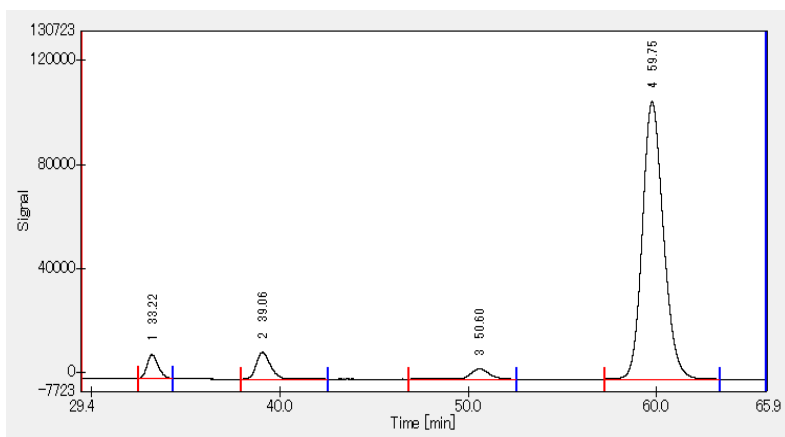

| No | Rt(min) | Area     | Area%   | Height | NTP     | Symmetry | Resolution |
|----|---------|----------|---------|--------|---------|----------|------------|
| 1  | 33.22   | 379003.8 | 4.0031  | 9122   | 13950.5 | 1.199    | 4.621      |
| 2  | 39.06   | 557366.2 | 5.887   | 10272  | 12404.9 | 1.263    | 7.145      |
| 3  | 50.6    | 274502.8 | 2.8994  | 3940   | 12280.2 | 1.16     | 4.673      |
| 4  | 59.75   | 8256819  | 87.2105 | 106565 | 13044.6 | 1.165    | *****      |
|    |         | 9467691  | 100     | 129899 |         |          |            |

3-Hydroxy-3-(4-nitrophenyl)-1-propan-1-one (**17r**): (AS-H column, *n*-hexane/*iso*-propanol: 90/10, flow Rate = 1.0 mL/min,  $\lambda=254$  nm, *dr*(*syn/anti*) = *n.d.*, 52% *ee anti*.)

**Racemic**

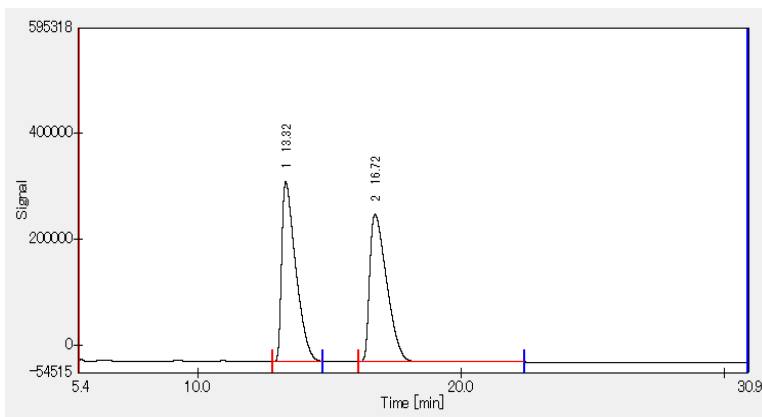

| No | Rt(min) | Area     | Area%  | Height | NTP    | Symmetry | Resolution |
|----|---------|----------|--------|--------|--------|----------|------------|
| 1  | 13.32   | 12536501 | 50.047 | 338398 | 2679.4 | 2.091    | 3.046      |
| 2  | 16.72   | 12512958 | 49.953 | 278010 | 3094.3 | 1.853    | *****      |
|    |         | 25049459 | 100    | 616408 |        |          |            |

**Chiral**

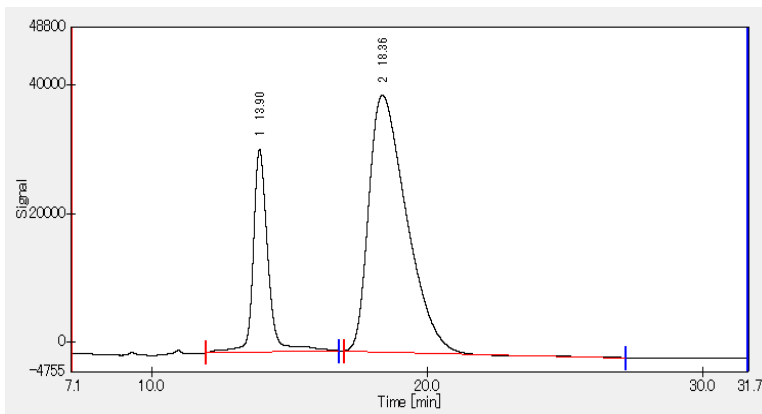

| No | Rt(min) | Area    | Area%   | Height | NTP    | Symmetry | Resolution |
|----|---------|---------|---------|--------|--------|----------|------------|
| 1  | 13.9    | 1174817 | 23.7938 | 31507  | 3668.6 | 1.226    | 2.553      |
| 2  | 18.36   | 3762670 | 76.2062 | 39886  | 814.2  | 1.602    | *****      |
|    |         | 4937487 | 100     | 71393  |        |          |            |

3-Hydroxy-3-(4-nitrophenyl)-1-phenylpropan-1-one (**17s**): AD-H column, *n*-hexane/*iso*-propanol: 90/10, flow Rate = 1.0 mL/min,  $\lambda=254$  nm, *dr*(*syn/anti*) = *n.d*, 82% *ee anti*.

**Racemic**

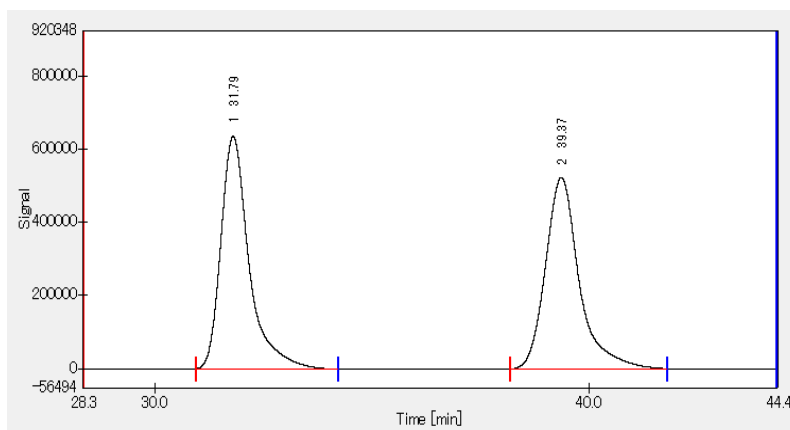

| No | Rt(min) | Area     | Area%   | Height  | NTP     | Symmetry | Resolution |
|----|---------|----------|---------|---------|---------|----------|------------|
| 1  | 31.79   | 28749255 | 50.3207 | 635412  | 10376.5 | 1.506    | 5.518      |
| 2  | 39.37   | 28382754 | 49.6793 | 523630  | 11074.9 | 1.346    | *****      |
|    |         | 57132009 | 100     | 1159042 |         |          |            |

**Chiral**

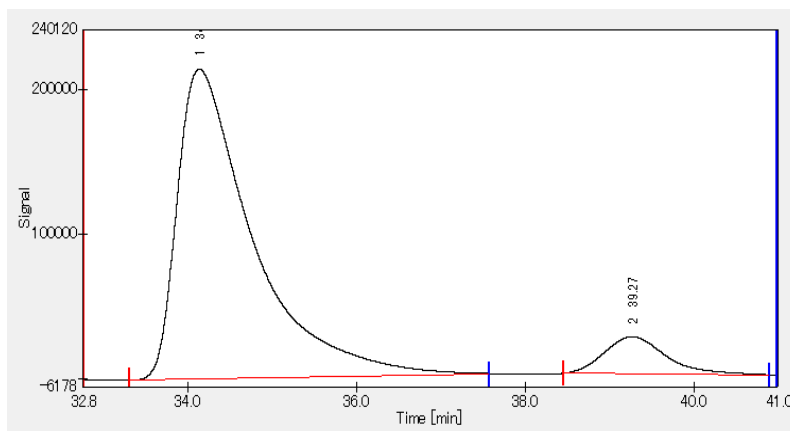

| No | Rt(min) | Area     | Area%   | Height | NTP     | Symmetry | Resolution |
|----|---------|----------|---------|--------|---------|----------|------------|
| 1  | 34.14   | 13262031 | 91.0873 | 213711 | 5836.2  | 2.452    | 3.227      |
| 2  | 39.27   | 1297658  | 8.9127  | 25604  | 12738.8 | 1.34     | *****      |
|    |         | 14559689 | 100     | 239315 |         |          |            |

2-[Hydroxy-(4-nitrophenyl)-methyl]-cyclohexan-1-one (**17a**): AD-H column, *n*-hexane/*iso*-propanol = 90/10, flow rate = 1.0 mL/min,  $\lambda=254$  nm, *dr*(*syn/anti*) = 24:76, 93% *ee anti*. (**1-gram Scale**)

**Racemic**

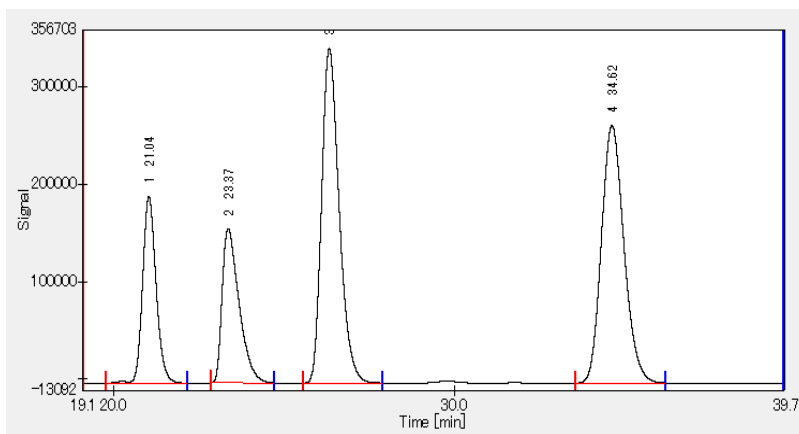

| No | Rt(min) | Area     | Area%   | Height | NTP     | Symmetry | Resolution |
|----|---------|----------|---------|--------|---------|----------|------------|
| 1  | 21.04   | 5240452  | 14.9537 | 191121 | 13076.6 | 1.18     | 2.769      |
| 2  | 23.37   | 5438855  | 15.5198 | 158075 | 9795.3  | 1.668    | 3.093      |
| 3  | 26.33   | 12231672 | 34.9032 | 342773 | 11799.8 | 1.3      | 7.509      |
| 4  | 34.62   | 12133538 | 34.6232 | 264130 | 12496.6 | 1.171    | *****      |
|    |         | 35044517 | 100     | 956099 |         |          |            |

**Chiral**

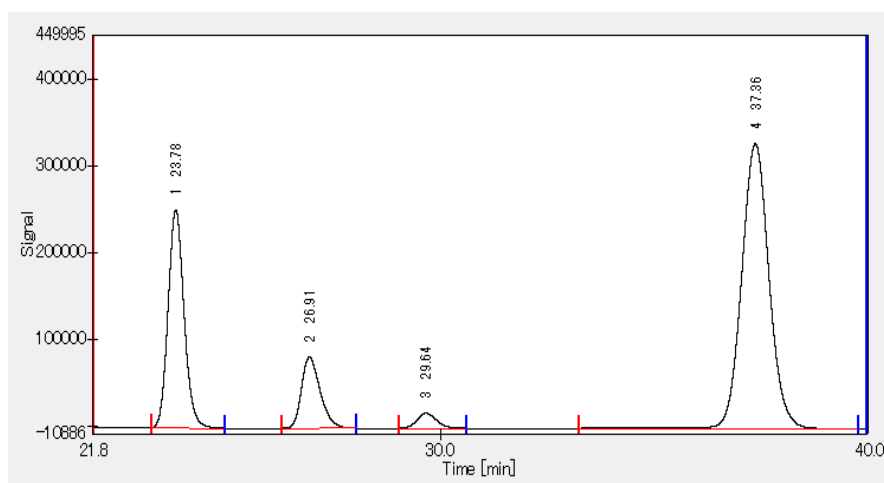

| No | Rt(min) | Area     | Area%   | Height | NTP     | Symmetry | Resolution |
|----|---------|----------|---------|--------|---------|----------|------------|
| 1  | 23.78   | 6549061  | 27.0478 | 252299 | 18549.7 | 1.141    | 4.109      |
| 2  | 26.91   | 2508992  | 10.3622 | 82344  | 16947.7 | 1.328    | 3.22       |
| 3  | 29.64   | 551944.9 | 2.2796  | 17238  | 18626   | 1.171    | 7.52       |
| 4  | 37.36   | 14602882 | 60.3104 | 328677 | 15936.7 | 1.067    | *****      |

24212880 100 680558
